# Supplementary material for: Use of environmental scans in health services delivery research: a scoping review
Source: PubMed Central journal article supplement — BMJ Open. 2021 Nov 10;11(11):e050284. doi: 10.1136/bmjopen-2021-050284 (PMC8587593; doi:10.1136/bmjopen-2021-050284), 2021-11-10
Supplement: bmjopen-2021-050284.draft_revisions.pdf [file bmjopen-2021-050284.draft_revisions.pdf]

# BMJ Open

BMJ Open is committed to open peer review. As part of this commitment we make the peer review history of every article we publish publicly available.

When an article is published we post the peer reviewers' comments and the authors' responses online. We also post the versions of the paper that were used during peer review. These are the versions that the peer review comments apply to.

The versions of the paper that follow are the versions that were submitted during the peer review process. They are not the versions of record or the final published versions. They should not be cited or distributed as the published version of this manuscript.

BMJ Open is an open access journal and the full, final, typeset and author-corrected version of record of the manuscript is available on our site with no access controls, subscription charges or pay-per-view fees (<http://bmjopen.bmj.com>).

If you have any questions on BMJ Open's open peer review process please email [info.bmjopen@bmj.com](mailto:info.bmjopen@bmj.com)

# BMJ Open

## Use of environmental scans in health services delivery research: a scoping review

|                               |                                                                                                                                                                                                                                                                                                                                                                                                                                                                                                                                                                                                                                                                                                                                                                                                                                                                            |
|-------------------------------|----------------------------------------------------------------------------------------------------------------------------------------------------------------------------------------------------------------------------------------------------------------------------------------------------------------------------------------------------------------------------------------------------------------------------------------------------------------------------------------------------------------------------------------------------------------------------------------------------------------------------------------------------------------------------------------------------------------------------------------------------------------------------------------------------------------------------------------------------------------------------|
| Journal:                      | <i>BMJ Open</i>                                                                                                                                                                                                                                                                                                                                                                                                                                                                                                                                                                                                                                                                                                                                                                                                                                                            |
| Manuscript ID                 | bmjopen-2021-050284                                                                                                                                                                                                                                                                                                                                                                                                                                                                                                                                                                                                                                                                                                                                                                                                                                                        |
| Article Type:                 | Original research                                                                                                                                                                                                                                                                                                                                                                                                                                                                                                                                                                                                                                                                                                                                                                                                                                                          |
| Date Submitted by the Author: | 15-Feb-2021                                                                                                                                                                                                                                                                                                                                                                                                                                                                                                                                                                                                                                                                                                                                                                                                                                                                |
| Complete List of Authors:     | Charlton, Patricia; University of Prince Edward Island, Adjunct Faculty, Faculty of Nursing<br>Kean, Terri; University of Prince Edward Island, Faculty of Nursing<br>Liu, Rebecca; University of Toronto, Women's College Hospital Institute for Health System Solutions and Virtual Care, Dalla Lana School of Public Health<br>Nagel, Daniel; University of Manitoba Faculty of Health Sciences, College of Nursing<br>Azar, R; Mount Allison University, Psychobiology of Stress and Health Lab, Psychology Department<br>Doucet, Shelley; University of New Brunswick, Department of Nursing and Health Sciences<br>Luke, Alison; University of New Brunswick, Department of Nursing and Health Sciences, Centre for Research in Integrated Care<br>Montelpare, William; University of Prince Edward Island, Department of Applied Human Sciences, Faculty of Science |
| Keywords:                     | PUBLIC HEALTH, STATISTICS & RESEARCH METHODS, Health policy < HEALTH SERVICES ADMINISTRATION & MANAGEMENT                                                                                                                                                                                                                                                                                                                                                                                                                                                                                                                                                                                                                                                                                                                                                                  |
|                               |                                                                                                                                                                                                                                                                                                                                                                                                                                                                                                                                                                                                                                                                                                                                                                                                                                                                            |

SCHOLARONE™  
Manuscripts

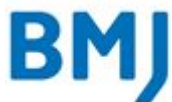

I, the Submitting Author has the right to grant and does grant on behalf of all authors of the Work (as defined in the below author licence), an exclusive licence and/or a non-exclusive licence for contributions from authors who are: i) UK Crown employees; ii) where BMJ has agreed a CC-BY licence shall apply, and/or iii) in accordance with the terms applicable for US Federal Government officers or employees acting as part of their official duties; on a worldwide, perpetual, irrevocable, royalty-free basis to BMJ Publishing Group Ltd ("BMJ") its licensees and where the relevant Journal is co-owned by BMJ to the co-owners of the Journal, to publish the Work in this journal and any other BMJ products and to exploit all rights, as set out in our [licence](#).

The Submitting Author accepts and understands that any supply made under these terms is made by BMJ to the Submitting Author unless you are acting as an employee on behalf of your employer or a postgraduate student of an affiliated institution which is paying any applicable article publishing charge ("APC") for Open Access articles. Where the Submitting Author wishes to make the Work available on an Open Access basis (and intends to pay the relevant APC), the terms of reuse of such Open Access shall be governed by a Creative Commons licence – details of these licences and which [Creative Commons](#) licence will apply to this Work are set out in our licence referred to above.

Other than as permitted in any relevant BMJ Author's Self Archiving Policies, I confirm this Work has not been accepted for publication elsewhere, is not being considered for publication elsewhere and does not duplicate material already published. I confirm all authors consent to publication of this Work and authorise the granting of this licence.

## Manuscript Title

Use of environmental scans in health services delivery research: a scoping review

**Corresponding author:** Patricia Charlton, PhD, Adjunct Faculty, Faculty of Nursing, University of Prince Edward Island, 550 University Avenue, Charlottetown, PEI. C1A 4P3. Canada.

Email: [pcharlton@upe.ca](mailto:pcharlton@upe.ca)

### Co-authors:

Terri Kean, Faculty of Nursing, University of Prince Edward Island, Charlottetown, PEI. Canada

Rebecca H Liu, PhD, Women's College Hospital Institute for Health Systems Solutions and Virtual Care, University of Toronto, Dalla Lama School of Public Health, Toronto, Ontario, Canada

Daniel A. Nagel, RN, PhD, College of Nursing, Rady Faculty of Health Sciences, University of Manitoba, Winnipeg, Manitoba, Canada

Rima Azar, PhD. Psychobiology of Stress and Health Lab, Psychology Department, Mount Alison University, Sackville, New Brunswick, Canada

Shelley Doucet, PhD, Department of Nursing and Health Sciences, University of New Brunswick in Saint John. Saint John, New Brunswick, Canada

Alison Luke, PhD, Department of Nursing and Health Sciences, Centre for Research in Integrated Care, University of New Brunswick Saint John. Saint John, NB. Canada

William Montelpare, PhD, Department of Applied Human Sciences, Faculty of Science, University of Prince Edward Island, Charlottetown, PEI. Canada

Word count: 5741

February 15, 2020

1  
2  
3 **Use of environmental scans in health services delivery research:**  
4  
5 **a scoping review**  
6  
7  
8  
9

10 **ABSTRACT**

11 **Objectives** To describe the extent and nature of evidence that describes the use of  
12 environmental scans (ESs) in the health services delivery research literature including the  
13 characteristics and design of these studies, and to propose a working definition in this  
14 context.  
15  
16  
17  
18  
19  
20

21 **Design** Scoping review

22 **Methods** This scoping review followed the five-stage scoping review methodology  
23 outlined by Khalil et al. The search strategy included searches of seven electronic  
24 databases and the grey literature. A Peer Review of Electronic Search Strategies (PRESS)  
25 was completed. A team of reviewers worked in pairs to independently perform the two  
26 levels of screening and the data extraction. Data were analyzed using qualitative content  
27 and thematic analysis.  
28  
29  
30  
31  
32  
33  
34  
35  
36

37 **Results.** Ninety-six studies were included in the scoping review. ESs were conducted for  
38 many purposes, the most common being to examine current state of programs, services,  
39 or policies. Researchers conducted ESs to examine trends, issues, services, policies,  
40 practices, policies, guidelines and standards, strategies, technologies, tools and resources,  
41 structures, and/or client/patient/provider perceptions and experiences. A variety of data  
42 collection methods were used, and 49% of the studies used both passive and active data  
43 collection approaches. Personal and impersonal sources of data were used to a similar  
44 extent, and external sources were more common than internal sources. Research gaps  
45  
46  
47  
48  
49  
50  
51  
52  
53  
54  
55  
56  
57  
58  
59  
60

1  
2  
3 identified were inconsistencies in terminology, absence of a standard definition, and lack  
4  
5 of guiding frameworks in the health services delivery context.  
6

7  
8 **Conclusions** ESs were conducted to gather evidence and inform decision-making on a  
9  
10 range of policy and health services delivery issues across the continuum of care. Clarity  
11  
12 in terminology and definition of ES, and more guidance on designing ESs may help to  
13  
14 provide structure and consistency for researchers and other stakeholders and help  
15  
16 advance ES as a methodological approach. A working definition is presented based on  
17  
18 the findings of this scoping review.  
19  
20  
21  
22  
23  
24  
25

26 **Key Words:** environmental scan, health care, health services delivery, scoping review,  
27  
28 protocol, research design  
29  
30  
31  
32  
33  
34  
35  
36  
37  
38  
39  
40  
41  
42  
43  
44  
45  
46  
47  
48  
49  
50  
51  
52  
53  
54  
55  
56  
57  
58  
59  
60

## Strengths and limitations of this study

### Strengths

- This scoping review addresses a knowledge gap on a subject that has not been extensively examined and includes an analysis of the peer-reviewed and grey literature.
- The study followed established and systematic methods for conducting scoping reviews.

### Limitations

- Limits were placed on the grey literature search, which may have resulted in some relevant studies being missed. Our comprehensive search strategy helped to mitigate this limitation.
- The quality of the studies included in our review were not assessed for methodological quality.
- This scoping review included studies that were in English only and that were available in the public domain.

## Use of environmental scans in health services delivery research: A scoping review

### INTRODUCTION

Environmental scanning involves the process of gathering pertinent information from an organization's external environment to identify trends and issues that present a threat or opportunity to the organization's success, and making effective use of that information to inform future response.[1–4] Evaluating and understanding environmental factors can equip organizations with the knowledge needed to inform decisions and formulate strategies to respond and adapt successfully to changing environmental conditions.[2–7]

Scanning the external environment and internal environments is integral to business and strategic planning.[8–11] The external environment includes elements outside the boundaries of an organization that can impact operations and performance and include: (1) the general (or macro) environment (e.g., political, technological, political/legal, economic, socio-cultural environments) and; (2) the task (or micro) environment, which includes those elements or groups with which the organization has direct interaction (e.g., customers, suppliers, resources, competitors, strategic partners).[9,12,13] The internal environment (e.g., structure, budget, workforce capacity and skills, organizational culture, leadership) must adapt to the demands or shifts in the external environment in order to evolve and succeed.[5,13–16]

Scanning activity can be formal or informal and is influenced by individual, contextual and organizational factors.[17–19] These factors include the size of the organization, educational level of individuals responsible for scanning, organizational strategy, availability and accessibility of information, and the perceived level of



1  
2  
3 environmental uncertainty (i.e. number of factors or complexity, and rate of change in the  
4 external environment), especially in those sectors that are most important to the  
5 organization's performance.[4,5,12,17–25]  
6  
7

8  
9  
10 Data collection methods and sources used in environmental scanning depend on  
11 an organization's information needs and scanning objectives.[17,19,23] Information is  
12 drawn from personal and impersonal sources that are internal and/or external to the  
13 organization but personal sources tend to be preferred.[4,5,20,22,24] Accessibility and  
14 quality of information (i.e. relevancy and reliability) are key factors in choosing data  
15 sources but other factors such as environmental uncertainty have also been shown to  
16 influence the selection of information sources.[5,19,20,22,24]  
17  
18  
19  
20  
21  
22  
23  
24  
25

### 26 **Health system and environmental scanning**

27  
28 In highly complex healthcare systems, environmental scanning is a key component of  
29 strategic planning and is vital to identify and assess trends, and/or issues that can either  
30 hinder or support achievement of long-term goals and impact performance.[9,15,18,26–  
31 31] Among these issues are shifting demographics, emerging healthcare innovations (e.g.  
32 technology), fluctuating resource constraints, human resource challenges, ever-changing  
33 patient demands and expectations, and major emerging events such as COVID-19  
34 pandemic.[10,15,31–40] Understanding environmental factors enables healthcare  
35 decision-makers to respond and adapt accordingly to emerging issues.[14,30,41] For  
36 example, a recent study about the influences of the macro environment (i.e. political,  
37 economic, socio-cultural and technological sectors) on health service strategy in private  
38 sector hospitals suggested that the technological sector was particularly influential in  
39 health services strategy.[30]  
40  
41  
42  
43  
44  
45  
46  
47  
48  
49  
50  
51  
52  
53  
54  
55  
56  
57  
58  
59  
60

1  
2  
3 While environmental scanning is widely conducted by healthcare organizations as  
4 part of strategic planning,[42–46] an environmental scan (ES) is often reported as a  
5 methodological approach in published studies that are focused on a specific health issue  
6 or problem. For instance, ESs have been used to explore current patient safety education  
7 and health care provider training programs [47,48] and to create quality indicators for  
8 various health services such as fall prevention and care of critically ill adult  
9 patients.[49,50] Environmental scans have been used to inform the design of cancer  
10 prevention programs [51,52], and explore the availability of health information  
11 resources.[53] Several studies noted the utility of an ES for assessing community needs  
12 and for program and policy development.[51,52,54,55]

13  
14  
15  
16  
17  
18  
19  
20  
21  
22  
23  
24  
25  
26 Despite the potential of ESs to inform policy and practice in health services  
27 delivery there appears to be no standard working definition for ES in this context to guide  
28 research and practice. [51,52,56] Terminology that describes an ES is inconsistent,  
29 [24,52,57] and limited practical guidance exists in the literature to assist researchers and  
30 practitioners to design and/or implement ESs. Guiding frameworks or models exist in the  
31 business and other sectors,[2,6,23,58–60] yet frameworks developed for the health  
32 services delivery context are comparatively lacking.[51,52,54–56] Health services  
33 related frameworks specific to ESs that are reported within the published health services  
34 delivery literature are limited. One exception is the framework developed by Wilburn et  
35 al. (2016) that highlights the value of an ES to public health practice in their study on  
36 human papilloma virus (HPV) vaccination.[52] Wilburn and colleagues outlined a seven-  
37 step process for conducting an ES which they maintain could be applied to other health  
38 issues and research.[52] In addition, a Canadian organization, the Canadian Agency for  
39  
40  
41  
42  
43  
44  
45  
46  
47  
48  
49  
50  
51  
52  
53  
54  
55  
56  
57  
58  
59  
60

1  
2  
3 Drugs and Technologies in Health (CADTH), conducts ES's to provide health care  
4  
5 decision-makers with objective evidence to support informed decision-making about the  
6  
7 optimal use of health technologies (e.g. drugs, devices, diagnostic tests, and medical,  
8  
9 surgical and dental procedures).[61] Researchers within CADTH follow CADTH's  
10  
11 specific organizational process for conducting ESs.[61] Still, some research suggests that  
12  
13 more study, evaluation, and refinement of ESs may enhance this approach and its utility  
14  
15 for supporting decision-making in health policy and practice.[51,52,56]  
16  
17  
18

19 In an attempt to address this knowledge gap, this scoping review was conducted  
20  
21 to examine the extent and nature of evidence on the use of ESs in a health services  
22  
23 delivery context. A review of the evidence can increase understanding of the utility and  
24  
25 limitations of this approach among stakeholders who are designing and implementing an  
26  
27 ES for research and/or other initiatives (e.g., quality improvement projects).  
28  
29  
30

31 This scoping review provides insight into how ESs are conceptualized, designed,  
32  
33 and implemented. It elucidates characteristics of these studies such as ES purpose,  
34  
35 setting, health domain (e.g., regulatory, technological environments), methods, data  
36  
37 sources, data source mode, scanning mode, definitions, guiding frameworks, and  
38  
39 limitations of these studies. Our results have yielded a working definition of ES in a  
40  
41 health services delivery context and the findings will inform future research to investigate  
42  
43 the development of a conceptual framework to guide practice. As such, this scoping  
44  
45 review may help inform research and practice. To our knowledge, this will be the first  
46  
47 scoping review conducted on this topic.  
48  
49  
50  
51  
52  
53  
54  
55  
56  
57  
58  
59  
60

## METHODS

A scoping review methodology was selected for three reasons: (1) this type of review employs a systematic approach to map the scope and volume of evidence on a specific topic; (2) scoping reviews can be helpful for clarifying concepts and definitions, and highlighting research gaps; and, (3) scoping reviews are particularly suitable for subject areas that have not been extensively reviewed such as is the case with the topic of our review. [62–66]

This scoping review followed the five-stage methodology outlined by Khalil et al. (2016) that builds on previous scoping review methodologies of Arksey and O'Malley, Levac et al., and the Joanna Briggs Institute: (1) identifying the research questions; (2) identifying relevant studies; (3) selecting studies using a team approach; (4) extracting and charting the data in a tabular and narrative format; and (5) collating the results to identify the implications of the study findings for practice, research, and/or policy (Khalil et al., pp.119-122).[62,66–71] The scoping review followed the PRISMA Extension for Scoping Reviews (PRISMA-ScR) reporting guidelines.[67,72]

### Protocol

The scoping review steps are briefly presented here. A full description of the protocol can be found in Charlton, Doucet, Azar et al. (2019).[57]

### Identifying the research questions

The main objectives of this scoping review were to:

1. Map the extent and nature of evidence examining the use or application of ESs within the health services delivery literature;

- 1
  - 2
  - 3
  - 4
  - 5
  - 6
  - 7
  - 8
  - 9
  - 10
  - 11
  - 12
  - 13
  - 14
  - 15
  - 16
  - 17
  - 18
  - 19
  - 20
  - 21
  - 22
  - 23
  - 24
  - 25
  - 26
  - 27
  - 28
  - 29
  - 30
  - 31
  - 32
  - 33
  - 34
  - 35
  - 36
  - 37
  - 38
  - 39
  - 40
  - 41
  - 42
  - 43
  - 44
  - 45
  - 46
  - 47
  - 48
  - 49
  - 50
  - 51
  - 52
  - 53
  - 54
  - 55
  - 56
  - 57
  - 58
  - 59
  - 60
2. Explore definitions, conceptualizations, theoretical underpinnings, and other characteristics including purpose, settings, design, health domain, methods, data sources, data source mode, scanning mode, guiding frameworks, and study limitations;
  3. Propose a working definition for the ES specific to the health services delivery context;
  4. Identify knowledge gaps and lay the groundwork for future research to explore the development of a guiding framework in this context.

The specific research questions were:

1. How have ESs been conceptualized and operationalized by stakeholders in the health services delivery literature?
  - a. What definitions and frameworks are used to describe and guide ES studies in the context of health services delivery and what were the characteristics of these studies?
  - b. What are the purposes for the ES? What healthcare issues are addressed and in what care settings?
  - c. What are the environmental health domains in which the ES studies are focused in the context of health services delivery (e.g., regulatory, technological)?
  - d. What types of study data collection approaches, methods, data sources, scanning modes and data source modes are used in ES studies in the context of health services delivery?

- 1  
2  
3 2. What limitations, if any, were described in the included studies that use ESs in the  
4  
5 context of health services delivery?  
6  
7

### 8 **Identifying relevant studies**

9

10 The search strategy was developed by an experienced research librarian (LB) and the  
11 research team according to established scoping review methodology. [62,68,69] A peer  
12 review of the search strategy was conducted by a second experienced research librarian  
13 (KM) according to the Peer Review of Electronic Search Strategies (PRESS)  
14 guidelines.[73,74] Seven bibliographic databases were searched: CINAHL, MEDLINE,  
15 PsycINFO, ERIC, Embase, Canadian Business & Current Affairs (CBCA), and  
16 Academic Search Premier. As an example, supplementary file 1 outlines the search  
17 strategy for Medline.  
18  
19  
20  
21  
22  
23  
24  
25  
26  
27

28 To facilitate a comprehensive scope of the literature, the grey literature and  
29 Google Scholar were also searched. The grey literature search included the grey literature  
30 collection of the New York Academy of Medicine Library Online Catalog[75] and *Grey*  
31 *Matters*, a resource developed by CADTH (2018) of Canadian and international  
32 government health technology assessment (HTA) websites, health economics resources  
33 and health prevalence or incidence databases.[76] The search term “environmental scan”  
34 was used for these platforms. A Google search was also performed using two search  
35 terms “environmental scan and health services”.  
36  
37  
38  
39  
40  
41  
42  
43  
44  
45  
46

47 To balance comprehensiveness with feasibility, searches of Google, Google  
48 Scholar, and the NYAM were limited to the first 10 pages (or first 100 hits). For  
49 CADTH’s *Grey Matters*, the top ten websites/databases deemed to be most relevant to  
50 the objectives of the study were selected to identify studies. Despite the limits placed on  
51  
52  
53  
54  
55  
56  
57  
58  
59  
60

1  
2  
3 the grey literature search, this comprehensive search strategy appeared to yield hits that  
4  
5 were representative of literature related to the topic of interest. The reference lists of  
6  
7 peer-reviewed sources were also hand searched for relevant studies.  
8  
9

### 10 **Selecting Studies**

11  
12 Table 1 outlines the specific inclusion and exclusion criteria for selection of studies. No  
13  
14 specific limitations were placed on publication date, population, health service, health  
15  
16 care setting (e.g., primary care, acute care, etc.), health care discipline, or geographic  
17  
18 location. Studies at full-text assessment were excluded from our review if they were  
19  
20 conference abstracts, protocols, poster presentations, review articles, and/or did not  
21  
22 reflect health services delivery. This scoping review specifically focused on studies  
23  
24 which reported using an “environmental scan” as a methodological approach. The  
25  
26 scoping review excluded studies that used other similar terms that may be similar to ES  
27  
28 such as ‘jurisdictional scans’ and ‘situational analysis’, and those where environmental  
29  
30 scanning is a component of broader planning techniques used in formal business and  
31  
32 strategic planning. [9,77]  
33  
34  
35  
36

### 37 **Table 1 Eligibility criteria**

---

#### 38 Inclusion criteria

39  
40  
41  
42 Studies were included if they were:

- 43  
44 ● specific to health services delivery
- 45  
46 ● specified that the study reported the use of an “environmental scan”
- 47  
48 ● published in English
- 49  
50
- 51
- 52
- 53
- 54
- 55
- 56
- 57
- 58
- 59
- 60

- (1) peer-reviewed academic journal papers (primary research studies) or; (2) grey literature (government and non-governmental environmental scan reports, and dissertations)

#### Exclusion criteria

Studies were excluded if they (were):

- not specific to health services delivery (e.g., focused on professional development and performance measurement or management)
- did not report the use of an “environmental scan”
- published in languages other than English
- review papers

---

Two reviewers independently screened titles and abstracts (PC,KT) and full-text articles of the peer-reviewed literature (PC, TK) to assess eligibility for inclusion in the study. Pilot tests were conducted at the beginning of first level (titles and abstracts) and second level (full-text) screening to evaluate reviewer agreement and to ensure consistency. For the grey literature, six team members met to discuss and review the screening process and then worked in pairs conduct both levels of screening (RHL, DAN, AL, TK, RA, and PC). Disagreements on study selection in the screening process were resolved through discussion or, if necessary, by a third reviewer (PC, TK, WJM). Figure 1 outlines a modified version of the PRISMA flowchart for scoping reviews.[72,78]

#### Charting the data

A standardized data extraction form (Microsoft Excel) was developed by the research team to extract data from the included articles. The data elements extracted were author,



1  
2  
3 country, publication year, publication type, purpose of the study, purpose of ES, health  
4 condition, health domain, setting, research approach, methods, data sources, data source  
5 mode, scanning mode, as well as other relevant information including existing  
6 definitions, guiding frameworks, and limitations.  
7  
8  
9  
10

11  
12 Working definitions for the extracted data elements were developed to provide  
13 clarification and consistency among researchers in the data extraction process. In  
14 particular, “scanning mode” has been defined inconsistently in the research literature  
15 referring to a four levels of scanning in some literature (i.e. undirected viewing,  
16 conditioned viewing, informal search, and formal search) and to data source in other  
17 studies .[17,24] Similar to Naumann et al. [56] we categorized scanning mode into two of  
18 the four scanning modes described by Choo- conditioned viewing and  
19 searching.[1,17,79] Viewing information is considered “passive” data collection, and  
20 refers to “looking at” information, while searching is considered “active” data collection  
21 and involves “looking for” information.[17] Conditioned viewing and searching were  
22 chosen because they were most relevant to the objectives of the scoping review. For  
23 example, according to Choo (2003) searching involves a deliberate and planned effort for  
24 specific information using a pre-established methodology, which reflects this research  
25 activity.[17]  
26  
27  
28  
29  
30  
31  
32  
33  
34  
35  
36  
37  
38  
39  
40  
41  
42  
43

44 The term “data source mode” was chosen to refer to the environment from which  
45 the data source emerged (i.e. internal or external source) and the nature of the data source  
46 (i.e. personal/impersonal) to differentiate from the scanning mode term used by  
47 Choo.[17] Internal data sources reflected those sources within the boundaries of the  
48 organization, and external sources were those outside of those boundaries of the  
49  
50  
51  
52  
53  
54  
55  
56  
57  
58  
59  
60

1  
2  
3 organization. Internal sources could include sources from various geographical sites but  
4 that were under the same organization. Personal sources were human data sources (e.g.,  
5 clinicians, health care staff, patients, experts from health and other sectors, community  
6 members, and other stakeholders), and impersonal were those non-human sources of data  
7 (e.g. reports, academic databases, administrative databases, web).  
8  
9  
10  
11  
12  
13

14  
15 Four teams of paired reviewers (PC, TK, PC, RA, TK, AL, RHL, DN)  
16 independently charted the peer-reviewed and grey literature. Pilot tests on the peer-  
17 reviewed and grey literature were conducted by the paired teams to assess agreement and  
18 promote consistency in data extraction between reviewers.[68,80] Data charting was an  
19 iterative process. Initial categories for the data elements were identified before the  
20 extraction process, and additional relevant categories and sub-levels of categories were  
21 added as researchers became more familiar with the literature. Each pair of reviewers met  
22 regularly to review extraction results and to resolve any discrepancies through discussion.  
23  
24  
25  
26  
27  
28  
29  
30  
31  
32  
33  
34

### 35 **Figure 1 here – PRISMA Flowchart**

#### 36 **Collating results**

37  
38 Content and thematic analysis were used to analyze the results.[81,82] The content  
39 analysis included a descriptive analysis using frequency counts and percentages to  
40 describe study characteristics using SAS Edition 3.6. Qualitative thematic analysis was  
41 used to illustrate key findings and themes. For the thematic analysis approach, initial  
42 codes were applied to the data that reflected the content being generated for several data  
43 elements that were amenable to thematic analysis. Thereafter, the codes were collated  
44 into potential themes based on patterns of similar codes.  
45  
46  
47  
48  
49  
50  
51  
52  
53  
54  
55  
56  
57  
58  
59  
60

1  
2  
3 All authors (PC, TK, RHL, DAN, RA, SD, AL, WJM) reviewed and discussed the  
4 preliminary findings. The data are presented in a tabular form and includes a narrative  
5 and descriptive numerical summary of the studies' characteristics. Knowledge gaps and  
6 implications for policy, practice, and research are highlighted.  
7  
8  
9

### 10 11 12 **Patient and public involvement**

13  
14 Research ethics review of this scoping review was not required. No patients or members  
15 of the public were involved in the study.  
16  
17

### 18 19 **RESULTS**

20  
21 A total of 96 studies were included in the scoping review, representing 60 from the peer-  
22 reviewed literature[51,56,77,83–139] and 36 from the grey literature.[140–175] A  
23 summary of general and design characteristics of specific studies appear in  
24 supplementary files 2, 3, 4 and 5. A summary of the characteristics of the studies are  
25 presented here in four sections including general characteristics, design characteristics,  
26 conceptual characteristics, and other observations.  
27  
28  
29  
30  
31  
32  
33  
34

### 35 36 **General characteristics**

37  
38 Publication date and country of origin

39  
40 Publication dates of the included studies ranged from 2001 to 2019. There was an  
41 increasing trend of ES studies specific to health services delivery over that time period  
42 (figure 2). Of the 96 studies, 42 (44%) were published since 2016. Studies originated  
43 from three countries (Canada, USA, and Australia), with most (n=65) from Canada  
44 (68%), and 27 (28%) from the USA.  
45  
46  
47  
48  
49  
50

51  
52 **Figure 2 Here**  
53  
54  
55  
56  
57  
58  
59  
60

## Population, healthcare setting and health conditions

Populations under inquiry ranged from newborn to older adults. The healthcare setting for the studies spanned the continuum of care. Most studies (n=55) were situated in multiple settings (57%). Nine studies were situated in acute care (9%), seven were in primary health care (7%), and five studies were in Regional Cancer Specialty Clinics (5%). Other settings are shown in figure 3. (see supplementary files 2 and 3 for detail on specific studies).

### Figure 3 Here

Close to half of the studies (n=44) focused on a particular chronic disease (46%), nine studies focused on chronic disease in general (9%), and eight focused on infections or infectious disease (8%). Other foci are shown in figure 4. Of those studies with a disease focus, the most common conditions were cancer appearing in 17 studies, mental health in five studies, heart disease and stroke in five studies, and diabetes in four studies. About 31% of studies (30/96) were not focused on any specific condition.

### Figure 4 Here

## Health care domains

The studies centered on various health care domains of the healthcare environment. The most common health domain was the clinical/treatment services environment which was included in 75 studies (78%), followed by the regulatory environment which was included in 31 studies (32%) and 20 studies included the

1  
2  
3 technological environment (21%). Other foci that appeared in the studies are listed in  
4  
5 descending order of frequency in figure 5.  
6

7  
8 **Figure 5 Here**  
9

10  
11 Purpose of the ESs  
12

13  
14 ESs were conducted for a wide range of purposes. The purposes reported in the  
15  
16 studies are summarized in table 2 in descending order of frequency. Seventy-nine studies  
17  
18 included the most common purpose which was to examine the current state of programs,  
19  
20 services, or policies (82%). The second most commonly cited purpose included in 56  
21  
22 studies was to identify patient/community /organization needs, strengths, challenges,  
23  
24 barriers, and service gaps (58%).  
25  
26  
27  
28  
29  
30  
31  
32  
33  
34  
35  
36  
37  
38  
39  
40  
41  
42  
43  
44  
45  
46  
47  
48  
49  
50  
51  
52  
53  
54  
55  
56  
57  
58  
59  
60

**Table 2** Summary of the purpose(s) of the environmental scans in the included studies

| Purpose of the ES(s)                                                                                                     | Studies<br>(%, n) |
|--------------------------------------------------------------------------------------------------------------------------|-------------------|
| Examine the current state of programs, services or policies                                                              | 82% (79)          |
| Identify and/or assess patient/community/organization needs, strengths, challenges, barriers and service gaps            | 58% (56)          |
| Identify and/or assess tools for patient care, or inform development of tools/ education materials/patient-decision aids | 23% (22)          |
| Understand the use or experience of a phenomenon or service                                                              | 22% (21)          |
| Inform program planning, design and/or improvement                                                                       | 21% (20)          |
| Inform recommendations for policy and practice                                                                           | 21% (20)          |
| Identify best practices or innovative practices                                                                          | 15% (14)          |
| Inform/guide quality improvement and/or patient safety initiatives                                                       | 14% (13)          |
| Inform aspects of practice or policy development or change.                                                              | 10% (10)          |
| Assess or inform models of care                                                                                          | 10% (10)          |
| Assess or inform clinical practice guidelines                                                                            | 9% (9)            |
| Inform the development of planning or evaluation frameworks                                                              | 8% (8)            |
| Inform improvements in the transition of care                                                                            | 6% (6)            |
| Inform future research or research program                                                                               | 5% (5)            |
| Inform standardization of services, processes, structure/organization and delivery                                       | 3% (3)            |
| Understand factors influencing health behaviours                                                                         | 2% (2)            |
| Assess or inform other types of guidelines and standards such as for use of technology                                   | 1% (1)            |

Note: Percentages do not add to 100 because there may be more than one purpose for an environmental scan.

## Design characteristics

### Data collection approach and methods

Of the 96 studies, 57 included qualitative methods (59%), 31 were mixed-methods (32%), and 8 were quantitative approaches (8%). Fifty-seven studies used more than one data collection method (59%). Data collection methods are shown in figure 6 (see supplementary files 4 and 5 for specific study details). The most common data collection methods were literature review which was employed in 66 studies (69%); followed by key informants or semi-structured interviews in 50 studies (52%). Thirty-three studies included surveys (34%). Researchers also used other types of person contact to collect data such as community advisory groups and expert panels.

### Figure 6 Here

### Scanning mode and sources

Of the 96 studies, almost half (49%) of the researchers used a combination of passive and active data collection methods (n=47). Twenty-six studies applied searching mode only (i.e., active) (27%), and 21 studies (22%) applied conditioned viewing only (i.e. passive).

Personal sources and impersonal sources of information were used to a similar extent. Of the 96 studies, 73 (76%) included personal sources of information and 69 studies (72%) included impersonal sources.

Twenty-five studies of the 96 studies used personal sources only (26%), and 21 studies used impersonal sources only (22%).

In terms of impersonal data sources, over half of the studies (n=54) reported using the internet/web (56%), followed by 35 studies that drew data from academic databases

1  
2  
3 (36%), and 20 studies reported using reports or other documents (21%). Other impersonal  
4  
5 sources are shown in figure 7.

### 8 **Figure 7 Here**

9  
10 Data source modes are shown in figure 8. External sources were more common  
11  
12 than internal sources. Overall, 83 studies included external sources (86%), and 36 studies  
13  
14 included internal sources (38%). External impersonal sources featured in 65 of the 96  
15  
16 studies (68%) of the studies. External personal sources were used in 62 studies (65%).

17  
18  
19 External sources represented both the general and task environments. In 31%  
20  
21 (30/96) of the studies, researchers collected data from sources external to the health  
22  
23 sector i.e. other government departments, education officials, community members,  
24  
25 patients, professional associations, and private businesses.[51,56,77,85,86,89,92–  
26  
27 94,102,103,106,108,110,114–116,119,124,126–128,130,133,144,146,159,160,163,170]

28  
29  
30  
31 Thirty-one studies (32%) included internal personal sources and 17 studies  
32  
33 included internal impersonal sources (18%) such as internal databases or reports. Eight  
34  
35 studies included all four data source modes (8%).

### 36 **Figure 8 Here**

#### 37 38 39 40 41 Limitations

42  
43 Approximately 65% (62/96) of the studies included a discussion of study  
44  
45 limitations. The most common limitations were those related to the search strategy,  
46  
47 sampling, design, data collection methods, and response rate.  
48  
49  
50  
51  
52  
53  
54  
55  
56  
57  
58  
59  
60



## Conceptual characteristics

### Rationale for ES

Of the 96 articles included in the review, three (3%) included a rationale for selecting an ES as a methodological approach.[90,110,175] Environmental scans were noted to be valuable tools to raise awareness, plan for the future, or provide information to support evidence-based policies.[101,131] They were perceived to be a flexible and adaptable tool to enable rapid collection of the required environmental information and for providing a snapshot of current work.[90,175]

### Terminology and definition of ES

Of the 96 included articles, 15% (14/96) included a definition of ES (1 in the grey literature and 13 in the peer-reviewed studies).[51,56,77,87,90,99,101,110,118,127,129,131,136,170] These definitions are provided in supplementary file 6. Of the 14 studies that included a definition, seven (50%) cited the work of Graham et al. (2008)[54] four studies (29%) referenced or cited the definition by Choo (2001)[2] four studies (29%) cited the work of Rowel et al., (2005)[51] and one study cited the American Society of Association Executives [ASAE] definition.[176]

Many of the definitions for ESs included reference to an evaluation of the environmental factors that affect an organization (e.g., programs, policies, and physical features). Some definitions described ESs as a “tool” for: (1) conducting needs assessments; (2) identifying, collecting, gathering, organizing, and retrieving information on environmental factors for planning and program design; (3) identifying barriers and service gaps; and; [4] reviewing the current state of evidence on a specific area of

1  
2  
3 focus.[51,56,90,110,129,136] An ES is further described as an effective, systematic,  
4 comprehensive, flexible, and rapid strategy to collect, summarize, and inform the  
5 development of approaches to health service delivery.[51,56,90,131,136]  
6  
7  
8  
9

10 Definitions tended to be future oriented, focusing on identifying emerging issues  
11 or opportunities and informing future planning.[2,77,90,110,127,129] Some of the  
12 definitions specified the external environment, [118] and others made reference to both  
13 the internal and external environments,[131] and two definitions included reference to  
14 data collection methods.[127,136]  
15  
16  
17  
18  
19  
20

21 A range of terms were used within the definitions to describe an ES. The most  
22 common term used was “tool” (43%) (6/14)[51,56,90,110,129,136], including a “mixed-  
23 methods tool”[90] and a “needs assessment tool”.[136] Other terms were “an objective  
24 review” or “review” (14%) (2/14) [87,99]; “method” or “research method” (14%)  
25 (2/14)[77,131]; “cross-sectional survey” (7%) (1/14)[101]; and “integral process” (7%)  
26 (1/14). [170] One study referred to an ES as a “rapid environmental scan” but did not  
27 provide a definition. [159]  
28  
29  
30  
31  
32  
33  
34  
35  
36

### 37 Guiding frameworks or models for ES

38 Of the 96 studies reviewed, 17 (18%) were conducted by CADTH researchers  
39 using their specific organizational process for conducting ESs. Of the remaining 79  
40 studies, five studies (6%) (5/79) reported being guided by a specific ES model or  
41 framework. These included four peer-reviewed articles [51,56,99,116] and one grey  
42 literature article.[144] Of these five studies, two [51,116] were guided by Choo’s  
43 conceptual model, [2] and one [56] was guided by both the Choo [2] and the ASAE  
44 frameworks.[176] The ASAE framework outlines four characteristics of environmental  
45  
46  
47  
48  
49  
50  
51  
52  
53  
54  
55  
56  
57  
58  
59  
60

1  
2  
3 scans.[176] A fourth study [144] was guided by the Wilburn et al. model.[52] The fifth  
4  
5 study implemented a “built” environmental scan which assesses the environmental  
6  
7 factors that influence an organization (e.g. programs, policies, and physical features).[99]  
8  
9  
10 The scan was based on a school-based evaluation model to evaluate cancer centers for  
11  
12 physical activity and sedentary behaviour information and infrastructure.[99] In addition,  
13  
14 two studies[140,170] reported being guided by scoping review methods, and one study  
15  
16 applied the Social Ecological Model to inform the development of the interview guide for  
17  
18 the ES.[93]  
19  
20

21  
22 Several other ES studies included conceptual models that were not specific to ES  
23  
24 but were used to guide analysis and reporting of results.

25  
26 [92,121,124,151,159,170,174,175] For example, Young et al. employed the  
27  
28 INTEGRATE-HTA Context and Implementation of Complex Interventions (CICI)  
29  
30 framework and applied the information gathered from the ES to guide the identification  
31  
32 of themes related to enablers and barriers associated with the implementation of internet-  
33  
34 delivered cognitive behavioral therapy (iCBT) in Canada.[174]  
35  
36

### 37 38 **Other observations**

39  
40 In most studies, the ES was the focus of the entire study employing one or more data  
41  
42 collection methods. In other studies the ES was only one of the methodological  
43  
44 components.[86,89,103–105,107,120,132,144,148,149,172,175] In some studies, ESs  
45  
46 were conducted in addition to a systematic review [91,125,148,149,172] or a scoping  
47  
48 review. [56,124,144] For example, Naumann charted ES data according to classifications  
49  
50 that emerged from the scoping review component of their study.[56] Several studies  
51  
52 reported that the ES component of a study was used to validate information gathered  
53  
54  
55  
56  
57  
58  
59  
60

1  
2  
3 from other methods used in those same studies such as interviews, focus groups, surveys  
4 and a scoping review.[56,100,103] Four studies emphasized that the ES was useful to  
5  
6 engage stakeholders in the program planning process.[51,56,85,170] Finally, one study  
7  
8 conducted an ES to develop the content areas for a survey as part of a systems analysis on  
9  
10 services and gaps in services for individuals with acquired brain injury.[120]  
11  
12  
13

## 14 **DISCUSSION**

15  
16  
17 Over the past decade ESs have been used to gather evidence to inform health  
18  
19 services program and policy development, yet little was known about how ESs were  
20  
21 designed and operationalized in the health services delivery literature. Our objective in  
22  
23 this scoping review was to describe the scope and nature of ESs within the health services  
24  
25 delivery literature including the characteristics of these studies and how they are  
26  
27 conceptualized, designed and implemented.  
28  
29

30  
31 Previous research suggested that ES is a useful tool for supporting health  
32  
33 planning, program and policy development.[6,51,54,55] The findings from this scoping  
34  
35 review provide evidence to support these observations. This scoping review indicates that  
36  
37 ES were conducted to gather evidence and inform decision-making on complex policy  
38  
39 and health service delivery issues in a range of settings and across the continuum of care.  
40  
41 The scoping review has shown that ESs can involve an examination of trends, issues,  
42  
43 policies, practices, services, tools and resources, guidelines and standards, structures,  
44  
45 strategies, technologies and other innovations, and/or patient/provider experiences related  
46  
47 to a particular health services delivery issue. This review also elucidates that ESs are  
48  
49 commonly conducted for an array of purposes including to: describe the current  
50  
51 landscape of programs, policies, or services; identify needs and service or policy gaps;  
52  
53  
54  
55  
56  
57  
58  
59  
60

1  
2  
3 identify barriers and facilitators to accessing services; assess or inform the design of  
4 programs, tools, or models of care; inform service and planning priorities, and planning  
5 frameworks; inform and/or assess adherence to clinical guidelines or other types of  
6 guidelines; inform the development of standards of care or other services; develop  
7 recommendations to improve service quality; enhance patient education and support  
8 services; and identify best practices, policies, strategies, innovative tools and  
9 technologies to improve and transform the quality, safety and efficiency of care.  
10  
11  
12  
13  
14  
15  
16  
17  
18

19           Nevertheless, despite the use and potential utility of ESs to inform practice, policy  
20 and planning in health services delivery, this scoping review has also identified  
21 significant research gaps. First, the findings of this review illustrated inconsistencies in  
22 terminology and definitions used to describe ES within the health services delivery  
23 literature. Within the 96 studies included in this review, wide variations of terms were  
24 used to describe ES, and other inconsistencies in terminology became apparent when this  
25 scoping review was being designed. For example, in previous research some researchers  
26 referred to data source as “scanning mode” while others referred to scanning mode as a  
27 component of a conceptual model.[1,2,19,21,177] In addition, researchers interpreted the  
28 term ‘passive’ data collection in various ways, which can add to the confusion connected  
29 to conducting an ES.[56,116,135]  
30  
31  
32  
33  
34  
35  
36  
37  
38  
39  
40  
41  
42  
43

44           Similar inconsistencies were noted among the definitions of ES found within the  
45 health services delivery literature. A limited number of studies cited or provided a formal  
46 definition but where a definition was available, the content and emphasis in the  
47 definitions varied.  
48  
49  
50  
51  
52  
53  
54  
55  
56  
57  
58  
59  
60

1  
2  
3 Given these findings, we suggest greater clarity in definition and terminology  
4 surrounding the ES could help provide structure and consistency for stakeholders who  
5 wish to undertake an ES, and help to advance ES as a methodological approach in health  
6 services delivery research. Based on the findings of the 96 primary studies in this scoping  
7 review and building on previous research and definitions,[2,51,52,54,87,131,178] we  
8 propose following working definition for environmental scan within the health services  
9 delivery context (Box 1):  
10  
11  
12  
13  
14  
15  
16  
17  
18  
19  
20  
21

#### 22 Box 1 Working definition of environmental scan

23  
24 Within the health services delivery context, an environmental scan is a  
25 type of inquiry that involves the systematic collection and analysis of  
26 information from internal and/or external environments to increase  
27 understanding of particular health services issues, inform future  
28 direction(s), and/or adapt to changing environments.  
29  
30  
31  
32

33  
34 Stakeholders use evidence generated through an environmental scan to  
35 examine and/or inform decision-making related to:  
36  
37  
38  
39  
40

- 41 • service needs, priorities, and trends;
  - 42 • current practices, programs, and policies;
  - 43 • policy and program planning, design and development;
  - 44 • organizational resources;
  - 45 • practice standards and guidelines;
  - 46 • quality improvement initiatives;
- 47  
48  
49  
50  
51  
52  
53  
54  
55  
56

- client/patient/provider experiences;
- patient support initiatives and tools (e.g., assessment and/or educational tools and resources; patient decision-aids);
- physical space/structure; and
- system transformation through the identification of best practice strategies, new models of care, and emerging technologies and innovations.

Secondly, this scoping review found a notable lack of formal guidance to support healthcare stakeholders in their attempts to design and conduct ESs within a health services delivery context. These gaps were evident in several of the included studies in this review as well as in existing literature.[51,52,55,56,129,144]. Of the studies not conducted by CADTH, five studies included in this scoping review referenced a specific ES guiding framework or model specific to the implementation of an ES,[51,56,99,116,144] and most frameworks were developed within business or education contexts. Choo's (2001) conceptual model [2] was most often cited. [51,56,116] Only one study[144] used a framework developed within the health services context.[52] In addition, two studies reported being guided by scoping review methods to guide the implementation of the ES.[140,170] Given the lack of frameworks developed within the health services delivery context, exploring the development of a guiding framework for conducting an ES specifically in this context could make an important contribution to future research and practice.

### Other characteristics

ESs focused on health services delivery have grown in use over the past decade, as noted in other studies.[54,56] Most studies included in this scoping review were published in North America (96%). The reason for this is unclear. It is possible that alternate terms were used to describe these types of studies in other countries or that studies may have been missed.

Consistent with previous research,[6,54] this scoping review described the range of methods used in ES studies depending on the objectives of the study. Personal and impersonal sources of information were used to a similar extent. Research from other sectors indicated that the most common and preferred sources of information tend to be personal sources.[1,5,19,20,22,24] Although it was beyond the scope of this review to evaluate preferred data collection sources of ESs conducted within a health services delivery context, several studies suggested personal sources may be particularly important to support or validate information collected from other methods in the study.[56,110,175] In addition, personal sources may also be important to gather new and relevant data that may be missed if a researcher relied exclusively on electronic or other sources of impersonal information.[110,175] Although it is not clear there is whether internal or external sources are preferred in other sectors, [5,19] this scoping review suggests that external sources of information were used to a greater extent than internal sources in the health services delivery context.

Finally, consistent with previous studies [52,54,55] several studies described ES as a useful means to increase stakeholder engagement. In recent years, a concerted emphasis has been placed on engaging the public and patients in health services delivery



1  
2  
3 and in health research.[179,180] Active engagement of stakeholders can inform policy  
4  
5 and planning, improve health service delivery[179] and lead to research that is more  
6  
7 relevant to stakeholders.[180]  
8  
9

### 10 **Strengths and limitations**

11  
12 There are several limitations to this scoping review study. Articles included from grey  
13  
14 literature databases were limited to those that appeared within the first 10 pages (or first  
15  
16 100 hits). Although this purposeful strategy was employed to balance comprehensiveness  
17  
18 with search feasibility, relevant studies may have been missed. To enhance inclusiveness,  
19  
20 broad search terms with no specific publication date limitations were used to identify the  
21  
22 grey and peer-reviewed academic literature. The included studies were not assessed for  
23  
24 methodological quality. This is in keeping with the primary purpose of a scoping review  
25  
26 to identify and map available evidence. With the goal to describe studies that specifically  
27  
28 incorporated “environmental scan”, this scoping review may have excluded studies that  
29  
30 used other terms to refer to approaches similar to ES such as ‘jurisdictional scans’ and  
31  
32 ‘situational analysis’. The strengths of this study include but are not limited to the  
33  
34 following. A data dictionary was developed to promote consistency among researchers  
35  
36 undertaking data extraction. Researchers met regularly to review the data extraction  
37  
38 process and results, and to resolve discrepancies. Data was categorized according to the  
39  
40 terminology used by the authors in the individual included studies. Finally, this study  
41  
42 reviewed a topic not previously examined and followed established methods for  
43  
44 conducting scoping reviews.  
45  
46  
47  
48  
49  
50  
51  
52  
53  
54  
55  
56  
57  
58  
59  
60

### **Future research and directions**

This research has implications for researchers and other stakeholders who are designing and implementing environmental scans to gather evidence to inform a particular health issue. This scoping review provides insight into how ES are designed and implemented, and proposes a working definition. More research is needed to further build on this definition and explore the development of potential frameworks that could help guide research and practice. Our future work will involve a further review of the literature and consultation with experts (e.g. researchers, policy-makers, practitioners, and other stakeholders) to further refine the definition presented, and potentially establish a consensus definition of an “environmental scan” within a health services delivery context. We will also explore the development of a methodological framework that may be of assistance to stakeholders in designing and conducting environmental scans.

### **CONCLUSION**

This scoping review addressed a knowledge gap by providing insights into the characteristics of an ES and how they are described, conceptualized, designed and implemented as reported in both the peer-reviewed and grey health services delivery literature. ES is type of inquiry that is commonly used within the health services delivery literature to generate evidence to inform decision-making on complex policy and health service delivery issues in a range of settings and across the continuum of care. The evidence generated by an ES is used for multiple purposes.

Despite these benefits, this scoping review also identified significant research gaps including inconsistencies in terminology and definitions used to describe ES within the health services delivery literature and a notable lack of formal guidance that could

1  
2  
3 help to support healthcare stakeholders in their attempts to design and conduct ESs within  
4  
5 this context. We suggest consistency in terminology and definition would contribute to  
6  
7 the advancement of the ES and have proposed a working definition for ES within the  
8  
9 health services delivery context.  
10

11  
12 Finally, health systems operate in a complex, dynamic environment, responding  
13  
14 constantly to current or emerging issues, and unpredictable events that can impact service  
15  
16 quality and efficiency. Evidence gathered through ES can support decision-making and  
17  
18 help healthcare organizations to respond and adapt to challenges and build on potential  
19  
20 opportunities.  
21  
22

23  
24 **Funding.** This research received no specific grant from any funding agency in the public,  
25  
26 commercial or not-for-profit sectors.  
27

28  
29 **Contributors.** All authors contributed to this research including the preparation and  
30  
31 editing of the manuscript. Team members contributed to the screening and analysis of  
32  
33 results (PC, TK, RHL, DAN, RA, SD, AL). PC developed the initial draft of the  
34  
35 manuscript, and after several iterations with significant input from the research team, all  
36  
37 team members (PC, TK, RHL, DAN, RA, SD, AL, WJM,) approved the final manuscript  
38  
39 that was submitted for publishing.  
40  
41

42  
43 **Acknowledgements.** We wish to also thank Christine Fahim, PhD, Scientist, Li Ka Shing  
44  
45 Knowledge Institute, St. Michael's Hospital, Toronto, Ontario for reviewing our initial  
46  
47 draft manuscript and providing helpful feedback.  
48  
49  
50  
51  
52  
53  
54  
55  
56  
57  
58  
59  
60

## REFERENCES

- 1 Aguilar FJ. *Scanning the business environment*. New York: Macmillan 1967.
- 2 Choo CW. Environmental scanning as information seeking and organizational learning. *Inf Res* 2001;7:1–26.
- 3 Eastough N. Improving Resilience through Environmental Scanning in Western. In: Boston J, Wanna J, Lipski V, et al. ed. *Future-Proofing the State: Managing Risks, Responding to Crisis and Building Resilience*. Canberra, Australia: Australia National University Press, 2014:135–46.
- 4 Zhang X, Majid S, Foo S. Environmental scanning practices of travel agent companies in Singapore. *Asia Pac J Tour Res* 2013;18:823-48.
- 5 Babalhavaeji F, Farhadpoor MR. Information source characteristics and environmental scanning by academic library managers. *Inf Res Int Electron J* 2013;18.
- 6 Albright K. Environmental scanning: radar for organizational success. *Inf Manag J* 2004;38:38–45.
- 7 Hough JR, White MA. Scanning actions and environmental dynamism: gathering information for strategic decision making. *Manag Decis* 2004;42:781–93.
- 8 Pashiardis P. Environmental scanning in educational organizations: Uses, approaches, sources and methodologies. *Int J Educ Manag* 1996;10:5–9.
- 9 Longest B. Strategic management and public policy. In: Leatt P, Mapa J, ed. *Government Relations in the Health Care Industry*. Westport, Connecticut: Greenwood Publishing Group 2003:23-45.
- 10 Tofts A, Walshe K. Managing resources. In: Walshe K, Smith J, eds. *Healthcare Management*. 2<sup>nd</sup> ed. New York: Open University Press, McGraw-Hill Education 2011:452-69.
- 11 Wright P. Strategic planning: a collaborative process. *Nurs Manag (Harrow)* 2020;51:40–7.
- 12 Duncan RB. Characteristics of organizational environments and perceived environmental uncertainty. *Adm Sci Q* 1972;17:313–27.
- 13 Morgan PI. The environment. In La Monica EL ed: *Management in Health Care-A Theoretical and Experiential Approach*. New York, NY: Palgrave Macmillan 1994:461–7.

- 14 Brown S. Strategies Health Care Leaders Use to Implement Strategic Change Initiatives Successfully. *Walden Diss Dr Stud*, 2020. <https://scholarworks.waldenu.edu/dissertations/8861> (Accessed Feb 2021).
- 15 Pourmohammadi K, Bastani P, Shojaei P, *et al*. A comprehensive environmental scanning and strategic analysis of Iranian public hospitals: a prospective approach. *BMC Res Notes* 2020;13:179.
- 16 Pulaj E, Pulaj I. The effects of strategic environmental analysis on organizational performance. *UBT Int Conf Manag Bus Econ* 2015;27:85–92.
- 17 Choo CW. The art of scanning the environment. In: Voros J, ed. *Reframing Environmental Scanning: A Reader on the Art Of Scanning The Environment*. Monograph series 2003. No. 4. Hawthorn, Australia: Australian Foresight Institute, Swinburne University of Technology 2003: 7–18.
- 18 Layman EJ, Bamberg R. Environmental scanning and the health care manager. *Health Care Manag* 2005;24:200–8.
- 19 Robinson CV, Ahmad F, Simmons JEL. Consolidation and fragmentation in environmental scanning: A review and research agenda. *Long Range Plann* 2020;101997.
- 20 Auster E, Choo CW. Environmental scanning by CEOs in two Canadian industries. *J Am Soc Inf Sci* 1993;44:194–203.
- 21 Daft RL, Sormunen J, Parks D. Chief executive scanning, environmental characteristics, and company performance: an empirical study. *Strateg Manag J* 1988;9:123–39.
- 22 Nkongolo-Bakenda J-M. Environmental scanning in globally oriented small businesses: practices suggested by managers. *J Comp Int Manag* 2003;6:23–57.
- 23 Raymond L, Julien P-A, Ramangalaby C. Technological Scanning by Small Canadian Manufacturers. *J Small Bus Manag* 2001;39:123–38.
- 24 Robinson CV, Simmons JEL. Organising environmental scanning: exploring information source, mode and the impact of firm size. *Long Range Plann* 2018;51:526–39.
- 25 Stewart WH, May RC, Kalia A. Environmental perceptions and scanning in the United States and India: convergence in entrepreneurial information seeking? *ET&P* 2008;32:83–106.
- 26 Davis MA, Miles G, McDowell WC. Environmental scanning as a moderator of strategy-performance relationships: an empirical analysis of physical therapy facilities. *Health Serv Manage Res* 2008;21:81–92.

- 1  
2  
3 27 Rodríguez Perera F de P, Peiró M. Strategic planning in healthcare organizations.  
4 *Rev Espanola Cardiol Engl Ed* 2012;65:749–54.  
5  
6  
7 28 Speziale G. Strategic management of a healthcare organization: engagement,  
8 behavioural indicators, and clinical performance. *Eur Heart J Suppl* 2015;17:A3–7.  
9  
10 29 Kumar K, Subramanian R, Strandholm K, et al. Competitive strategy, environmental  
11 scanning and performance: a context specific analysis of their relationship. *Int J*  
12 *Commer Manag* 2001;11:1–33.  
13  
14 30 Ahmad AMK. Macro-environment influences on health service strategy in Saudi  
15 private sector hospitals: an empirical investigation. *Int Bus Res* 2012;5:49-64.  
16  
17 31 Mosadeghrad AM. Factors affecting medical service quality. *Iran J Public Health*  
18 2014;43:210–20.  
19  
20  
21 32 Smith J, Walshe K. Introduction: The current and future challenges of healthcare  
22 management. In: Walshe K, Smith J, eds. *Healthcare Management*. New York:  
23 Open University Press, McGraw-Hill Education 2011:1–10.  
24  
25 33 Conference Board of Canada. *Health care cost drivers in Canada: pre-and post-*  
26 *covid-19*. Ottawa, Ontario: The Conference Board of Canada, 2020.  
27 [https://www.conferenceboard.ca/e-](https://www.conferenceboard.ca/e-library/abstract.aspx?did=10816&AspxAutoDetectCookieSupport=1)  
28 [library/abstract.aspx?did=10816&AspxAutoDetectCookieSupport=1](https://www.conferenceboard.ca/e-library/abstract.aspx?did=10816&AspxAutoDetectCookieSupport=1). (Accessed Feb  
29 2021)  
30  
31  
32 34 Dornan T, McKendree J, Robbé IJ. Medical education in an age of complexity,  
33 uncertainty and reflection: a coda to the Flexner centenary. *Med Educ* 2011;45:2–6.  
34  
35 35 Health Canada. *Unleashing innovation. Excellent healthcare for Canada. Report of*  
36 *the Advisory Panel on Healthcare Innovation Government of Canada*. Ottawa,  
37 Ontario: Health Canada, 2015. [https://www.canada.ca/en/health-](https://www.canada.ca/en/health-canada/services/publications/health-system-services/unleashing-innovation-excellent-healthcare-canada-executive-summary.html)  
38 [canada/services/publications/health-system-services/unleashing-innovation-](https://www.canada.ca/en/health-canada/services/publications/health-system-services/unleashing-innovation-excellent-healthcare-canada-executive-summary.html)  
39 [excellent-healthcare-canada-executive-summary.html](https://www.canada.ca/en/health-canada/services/publications/health-system-services/unleashing-innovation-excellent-healthcare-canada-executive-summary.html) (Accessed Feb 2021)  
40  
41  
42 36 Lateef F. Patient expectations and the paradigm shift of care in emergency  
43 medicine. *J Emerg Trauma Shock* 2011;4:163–7.  
44  
45 37 MacNeil M, Koch M, Kuspinar A, et al. Enabling health technology innovation in  
46 Canada: barriers and facilitators in policy and regulatory processes. *Health Policy*  
47 2019;123:203–14.  
48  
49  
50 38 The Conference Board of Canada. *Future care for Canadian seniors: a primer on*  
51 *nursing supply and demand*. Ottawa, Ontario: The Conference Board of Canada,  
52 2017. <https://www.conferenceboard.ca/e-library/abstract.aspx?did=8679>. (Accessed  
53 Feb 2021).  
54  
55  
56  
57  
58  
59  
60

- 1  
2  
3 39 Varin M, Baker M, Palladino E, *et al.* At-a-glance: Canadian chronic disease  
4 indicators, 2019: updating the data and taking into account mental health. *Health*  
5 *Promot Chronic Dis Prev Can* 2019;39:281–88.  
6  
7  
8 40 House of Commons Canada. *Technological innovation in health care. report of the*  
9 *Standing Committee on Health*. 2013. Ottawa, Ontario: House of Commons,  
10 Government of Canada.  
11 [https://www.ourcommons.ca/Content/Committee/411/HESA/Reports/RP6221741/h](https://www.ourcommons.ca/Content/Committee/411/HESA/Reports/RP6221741/hesarp14/hesarp14-e.pdf)  
12 [esarp14/hesarp14-e.pdf](https://www.ourcommons.ca/Content/Committee/411/HESA/Reports/RP6221741/hesarp14/hesarp14-e.pdf). (Accessed Feb 2021)  
13  
14 41 Tarver WL, Menachemi N. Environmental market factors associated with electronic  
15 health record adoption among cancer hospitals. *Health Care Manage Rev*  
16 2018;43:303-14.  
17  
18 42 Canadian Blood Services. *Keeping the promise: Strategic plan 2019-2024*. Ottawa,  
19 Ontario: Canadian Blood Services, 2019. <https://www.blood.ca/en> (Accessed Feb  
20 2021)  
21  
22 43 Southern Health-Sante Sud. *Southern Health-Sante Sud strategic health plan 2016-*  
23 *2021*. Southern Health-Sante Sud, Manitoba: Southern Health-Sante Sud, (nd).  
24 [https://www.southernhealth.ca/assets/AnnualReports/c2f9a8e99e/Strategic-Health-](https://www.southernhealth.ca/assets/AnnualReports/c2f9a8e99e/Strategic-Health-Plan-2016-21.pdf)  
25 [Plan-2016-21.pdf](https://www.southernhealth.ca/assets/AnnualReports/c2f9a8e99e/Strategic-Health-Plan-2016-21.pdf). (Accessed Feb 2021)  
26  
27 44 Ontario Ministry of Health and Long Term Care, *Ontario's LHINs. Environmental*  
28 *scan 2019-2022 integrated health service plans*. Toronto, Ontario: Ontario Ministry  
29 of Health and Long Term Care, 2018.  
30 [http://www.wlhins.on.ca/~media/sites/ww/files/goalsandachievements/DATA\\_061](http://www.wlhins.on.ca/~media/sites/ww/files/goalsandachievements/DATA_06112019_IHSP_EVSCAN_FULL.pdf?la=en)  
31 [12019\\_IHSP\\_EVSCAN\\_FULL.pdf?la=en](http://www.wlhins.on.ca/~media/sites/ww/files/goalsandachievements/DATA_06112019_IHSP_EVSCAN_FULL.pdf?la=en). (Accessed Feb 2021)  
32  
33 45 Royal College of Physicians and Surgeons of Canada. *Cutting through the health*  
34 *system information fog: Royal College environmental scan*. Ottawa, Ontario: Royal  
35 College of Physicians and Surgeons of Canada, 2017.  
36 [https://www.royalcollege.ca/rcsite/documents/health-policy/enviromental-scan-](https://www.royalcollege.ca/rcsite/documents/health-policy/enviromental-scan-e.pdf)  
37 [e.pdf](https://www.royalcollege.ca/rcsite/documents/health-policy/enviromental-scan-e.pdf). (Accessed Feb 2021)  
38  
39 46 Ontario Hospital Association. *Ontario Hospital Association strategic plan 2018-*  
40 *2021*. Toronto, Ontario: Ontario Hospital Association, (nd)  
41 [www.oha.com/strategicplan](http://www.oha.com/strategicplan). (Accessed Jan 2021)  
42  
43 47 Stacey D, Carley M, Kohli J, *et al.* Remote symptom support training programs for  
44 oncology nurses in Canada: an environmental scan. *Can Oncol Nurs J Rev Can*  
45 *Soins Infirm En Oncol* 2014;24:78–82.  
46  
47 48 American Institutes for Research. *Environmental scan of patient safety education*  
48 *and training programs*. Washington, DC: Agency for Healthcare Research and  
49 Quality, 2013. [https://www.ahrq.gov/research/findings/final-reports/environmental-](https://www.ahrq.gov/research/findings/final-reports/environmental-scan-programs/index.html)  
50 [scan-programs/index.html](https://www.ahrq.gov/research/findings/final-reports/environmental-scan-programs/index.html). (Accessed Jan 2021)  
51  
52  
53  
54  
55  
56  
57  
58  
59  
60

- 1  
2  
3 49 Manafò E, Ontario Fall Prevention Collaborative. *An environmental scan of older*  
4 *adult fall prevention indicators*. Toronto, Ontario: Ontario Fall Prevention  
5 Collaborative, Ontario Neurotrauma Foundation, 2020. [https://onf.org/wp-](https://onf.org/wp-content/uploads/2020/06/OFPCollaborative-Environmental-Scan-Indicators-April-2020-v9.pdf)  
6 [content/uploads/2020/06/OFPCollaborative-Environmental-Scan-Indicators-April-](https://onf.org/wp-content/uploads/2020/06/OFPCollaborative-Environmental-Scan-Indicators-April-2020-v9.pdf)  
7 [2020-v9.pdf](https://onf.org/wp-content/uploads/2020/06/OFPCollaborative-Environmental-Scan-Indicators-April-2020-v9.pdf). (Accessed Feb 2021).  
8  
9  
10 50 Valiani S, Rigal R, Stelfox HT, *et al*. An environmental scan of quality indicators in  
11 critical care. *CMAJ Open* 2017;5:E488–95.  
12  
13 51 Rowel R, Moore ND, Nowrojee S, *et al*. The utility of the environmental scan for  
14 public health practice: lessons from an urban program to increase cancer screening.  
15 *J Natl Med Assoc* 2005;97:527–34.  
16  
17 52 Wilburn A, Vanderpool RC, Knight JR. Environmental scanning as a public health  
18 tool: Kentucky’s human papillomavirus vaccination project. *Prev Chronic Dis*  
19 2016;13:E109.  
20  
21 53 Marton C. Environmental scan on women’s health information resources in Ontario,  
22 Canada. *Inf Res* 2001;7.  
23  
24 54 Graham P, Evitts T, Thomas-MacLean R. Environmental scans: how useful are they  
25 for primary care research? *Can Fam Physician Med Fam Can* 2008;54:1022–3.  
26  
27 55 Scobba V. PS1-23: The environmental scan: a valuable community health research  
28 tool. *Clin Med Res* 2010;8:184–5.  
29  
30 56 Naumann DN, Reynolds JN, McColl MA, *et al*. Environmental scan of programs for  
31 fetal alcohol spectrum disorder in Eastern Ontario. *J Dev Disabil* 2013;19:29-49.  
32  
33 57 Charlton P, Doucet S, Azar R, *et al*. The use of the environmental scan in health  
34 services delivery research: a scoping review protocol. *BMJ Open* 2019;9:e029805.  
35  
36 58 Zhang X, Majid S, Foo S. Environmental scanning: an application of information  
37 literacy skills at the workplace. *J Inf Sci* 2010;36:719–32.  
38  
39 59 Costa J. An empirically-based review of the concept of environmental scanning. *Int*  
40 *J Contemp Hosp Manag* 1995;7:4–9.  
41  
42 60 Rathi D, Shiri A, Cockney C. Environmental scan: a methodological framework to  
43 initiate digital library development for communities in Canada’s North. *Aslib J Inf*  
44 *Manag* 2017;69:76–94.  
45  
46 61 Canadian Agency for Drugs and Technologies in Health (CADTH). Environmental  
47 scan process. Ottawa, Ontario: Canadian Agency for Drugs and Technologies in  
48 Health (CADTH), 2015.  
49 [https://www.cadth.ca/sites/default/files/pdf/ES%20External%20Audience%20Proce-](https://www.cadth.ca/sites/default/files/pdf/ES%20External%20Audience%20Process%20Doc.pdf)  
50 [ss%20Doc.pdf](https://www.cadth.ca/sites/default/files/pdf/ES%20External%20Audience%20Process%20Doc.pdf). (Accessed Dec 2020).  
51  
52  
53  
54  
55  
56  
57  
58  
59  
60



- 1  
2  
3 62 Arksey H, O'Malley L. Scoping studies: towards a methodological framework. *Int J Soc Res Methodol* 2005;8:19–32.  
4  
5  
6  
7 63 Aromataris E, Munn Z (Editors). *JBIManual for Evidence Synthesis*. 2020.  
8 <https://wiki.jbi.global/display/MANUAL/Downloadable+PDF+-+current+version>.  
9 (Accessed Feb 2021).  
10  
11 64 Davis K, Drey N, Gould D. What are scoping studies? A review of the nursing  
12 literature. *Int J Nurs Stud* 2009;46:1386–400.  
13  
14 65 Munn Z, Peters MDJ, Stern C, *et al*. Systematic review or scoping review?  
15 Guidance for authors when choosing between a systematic or scoping review  
16 approach. *BMC Med Res Methodol* 2018;18:143.  
17  
18 66 Peters MDJ, Godfrey CM, Khalil H, *et al*. Guidance for conducting systematic  
19 scoping reviews. *Int J Evid Based Healthc* 2015;13:141–6.  
20  
21 67 Peters M, Godfrey C, McInerney P, *et al*. Chapter 11: Scoping Reviews. In:  
22 Aromataris E, Munn Z, ed. *JBIManual for Evidence Synthesis*. JBI 2020.  
23 <https://wiki.jbi.global/display/MANUAL/Downloadable+PDF+-+current+version>.  
24 (Accessed Feb 2021)  
25  
26 68 Levac D, Colquhoun H, O'Brien KK. Scoping studies: advancing the methodology.  
27 *Implement Sci* 2010;5:69.  
28  
29 69 Khalil H, Peters M, Godfrey CM, *et al*. An evidence-based approach to scoping  
30 reviews. *Worldviews Evid Based Nurs* 2016;13:118–23.  
31  
32 70 Tricco AC, Lillie E, Zarin W, *et al*. A scoping review on the conduct and reporting  
33 of scoping reviews. *BMC Med Res Methodol* 2016;16:15.  
34  
35 71 Aromataris E, Riitano D. Constructing a search strategy and searching for evidence:  
36 a guide to the literature search for a systematic review. *Am J Nurs* 2014;114:49–56.  
37  
38 72 Tricco AC, Lillie E, Zarin W, *et al*. PRISMA extension for scoping reviews  
39 (PRISMA-SCR): checklist and explanation. *Ann Intern Med* 2018;169:467–73.  
40  
41 73 Sampson M, McGowan J, Cogo E, *et al*. An evidence-based practice guideline for  
42 the peer review of electronic search strategies. *J Clin Epidemiol* 2009;62:944–52.  
43  
44 74 McGowan J, Sampson M, Salzwedel DM, *et al*. PRESS peer review of electronic  
45 search strategies: 2015 guideline statement. *J Clin Epidemiol* 2016;75:40–6.  
46  
47 75 New York Academy of Medicine. *Library*. New York, New York: New York  
48 Academy of Medicine, 2021. <https://www.nyam.org/library/> (Accessed Feb 2021)  
49  
50 76 Canadian Agency for Drugs and Technologies in Health (CADTH). *Grey Matters: a  
51 practical tool for searching health-related grey literature*. Ottawa, Ontario:  
52  
53  
54  
55  
56  
57  
58  
59  
60

- 1  
2  
3 Canadian Agency for Drugs and Technology, 2019.  
4 <https://www.cadth.ca/resources/finding-evidence/grey-matters> (Accessed Feb 2021).  
5  
6  
7 77 Shahid S, Beckmann KR, Thompson SC. Supporting cancer control for Indigenous  
8 Australians: initiatives and challenges for cancer councils. *Aust Health Rev Publ*  
9 *Aust Hosp Assoc* 2008;32:56–65.  
10  
11 78 Moher D, Liberati A, Tetzlaff J, *et al.* Preferred reporting items for systematic  
12 reviews and meta-analyses: the PRISMA statement. *PLoS Med* 2009;6:e1000097.  
13  
14 79 Daft RL, Weick KE. Toward a model of organizations as interpretation systems.  
15 *Acad Manage Rev* 1984;9:284–95.  
16  
17 80 Daudt HM, van Mossel C, Scott SJ. Enhancing the scoping study methodology: a  
18 large, inter-professional team’s experience with Arksey and O’Malley’s framework.  
19 *BMC Med Res Methodol* 2013;13:48.  
20  
21 81 Vaismoradi M, Turunen H, Bondas T. Content analysis and thematic analysis:  
22 Implications for conducting a qualitative descriptive study. *Nurs Health Sci*  
23 2013;15:398–405.  
24  
25 82 Braun V, Clarke V. Using thematic analysis in psychology. *Qual Res Psychol*  
26 2006;3:77–101.  
27  
28 83 Abrahamyan L, Wong J, Pham B, *et al.* Structure and characteristics of community-  
29 based multidisciplinary wound care teams in Ontario: an environmental scan.  
30 *Wound Repair Reg* 2015;23:22–9.  
31  
32 84 Ahmad N, Simanovski V, Hertz S, *et al.* Oral chemotherapy practices at Ontario  
33 cancer centres. *J Oncol Pharm Pract* 2015;21:249–57.  
34  
35 85 Baezconde-Garbanati L, Lienemann BA, Robles M, *et al.* Implementation of HPV  
36 vaccination guidelines in a diverse population in Los Angeles: Results from an  
37 environmental scan of local HPV resources and needs. *Vaccine* 2017;35:4930–5.  
38  
39 86 Bak K, Gutierrez E, Lockhart E, *et al.* Use of continuous infusion pumps during  
40 radiation treatment. *J Oncol Pract* 2013;9:107–11.  
41  
42 87 Bakhru RN, Wiebe DJ, McWilliams DJ, *et al.* An environmental scan for early  
43 mobilization practices in U.S. ICUs. *Crit Care Med* 2015;43:2360–9.  
44  
45 88 Ball GDC, Ambler KA, Chanoine J-P. Pediatric weight management programs in  
46 Canada: where, what and how? *Int J Pediatr Obes* 2011;6:e58-61.  
47  
48 89 Battye KM, McTaggart K. Development of a model for sustainable delivery of  
49 outreach allied health services to remote north-west Queensland, Australia.  
50 *International Journal of Rural and Remote Health, Research, Education, Practice*  
51 *and Policy* 2003;3:194.  
52  
53  
54  
55  
56  
57  
58  
59  
60

- 1  
2  
3 90 Bednar EM, Walsh MT, Baker E, *et al.* Creation and implementation of an  
4 environmental scan to assess cancer genetics services at three oncology care  
5 settings. *J Genet Couns* 2018;27:1482-1496.  
6  
7  
8 91 Brouwers M, Oliver TK, Crawford J, *et al.* Cancer diagnostic assessment programs:  
9 standards for the organization of care in Ontario. *Curr Oncol* 2009;16:29-41.  
10  
11 92 Carter N, Valaitis R, Feather J, *et al.* An environmental scan of health and social  
12 system navigation services in an urban Canadian community. *SAGE Open Nurs*  
13 2017;3:2377960816689566.  
14  
15 93 Cartmell KB, Young-Pierce J, McGue S, *et al.* Barriers, facilitators, and potential  
16 strategies for increasing HPV vaccination: A statewide assessment to inform action.  
17 *Papillomavirus Res* 2018;5:21-31.  
18  
19  
20 94 Chang F, Paramsothy T, Roche M, *et al.* Patient, staff, and clinician perspectives on  
21 implementing electronic communications in an interdisciplinary rural family health  
22 practice. *Prim Health Care Res Dev* 2017;18:149-60.  
23  
24 95 Davies B, Edwards N, Ploeg J, *et al.* Insights about the process and impact of  
25 implementing nursing guidelines on delivery of care in hospitals and community  
26 settings. *BMC Health Serv Res* 2008;8:29.  
27  
28  
29 96 DeGroff A, Coa K, Morrissey KG, *et al.* Key considerations in designing a patient  
30 navigation program for colorectal cancer screening. *Health Promot Pract*  
31 2014;15:483-95.  
32  
33 97 Delparte JJ, Chau BA, Mills S, *et al.* Spinal cord essentials: The development of an  
34 individualized, handout-based patient and family education initiative for people with  
35 spinal cord injury. *Spinal Cord* 2014;52:400-6.  
36  
37  
38 98 Finnigan-Fox G, Matlock DD, Tate CE, *et al.* Hospice, she yelped: examining the  
39 quantity and quality of decision support available to patient and families considering  
40 hospice. *J Pain Symptom Manage* 2017;54:916-921.  
41  
42 99 Fong AJ, Jones JM, Faulkner G, *et al.* Exploring cancer centres for physical activity  
43 and sedentary behaviour support for breast cancer survivors. *Curr Oncol* 2018;25:  
44 e365-e372.  
45  
46  
47 100 Frost JR, Cherry RK, Oyeku SO, *et al.* Improving sickle cell transitions of care  
48 through health information technology. *Am J Prev Med* 2016;51:S17-23.  
49  
50 101 Glurich I, Nycz G, Acharya A. Status update on translation of integrated primary  
51 dental-medical care delivery for management of diabetic patients. *Clin Med Res*  
52 2017;15:21-32.  
53  
54 102 Goldwater JC, Kwon NJ, Nathanson A, *et al.* Open source electronic health records  
55 and chronic disease management. *J Am Med Inform Assoc* 2014;21:e50-4.  
56  
57  
58  
59  
60

- 1  
2  
3 103 Gustafson DL, Goodyear L, Keough F. When the dragon's awake: a needs  
4 assessment of people injecting drugs in a small urban centre. *Int J Drug Policy*  
5 2008;19:189–94.  
6  
7  
8 104 Hauck Y, Rock D, Jackiewicz T, *et al.* Healthy babies for mothers with serious  
9 mental illness: a case management framework for mental health clinicians. *Int J*  
10 *Ment Health Nurs* 2008;17:383–91.  
11  
12 105 Hogan TP, Nazi KM, Luger TM, *et al.* Technology-assisted patient access to  
13 clinical information: an evaluation framework for blue button. *JMIR Res Protoc*  
14 2014;3:e18.  
15  
16 106 Hogenbirk JC, Brockway PD, Finley J, *et al.* Framework for Canadian telehealth  
17 guidelines: summary of the environmental scan. *J Telemed Telecare* 2006;12:64-70.  
18  
19 107 Jeon J, White RE, Hunt RG, *et al.* optimizing the design of preprinted orders for  
20 ambulatory chemotherapy: combining oncology, human factors, and graphic design.  
21 *J Oncol Pract* 2012;8:97–102.  
22  
23 108 Joschko J, Keely E, Grant R, *et al.* Electronic consultation services worldwide:  
24 environmental scan. *J Med Internet Res* 2018;20:e11112.  
25  
26 109 Kobe CM, Turcotte LM, Sadak KT. A narrative literature review and environmental  
27 scan of self-management education programs for adolescent and young adult  
28 survivors of childhood cancer. *J Canc Educ* 2020;35:731–5.  
29  
30 110 Leiva Portocarrero ME, Garvelink MM, Becerra Perez MM, *et al.* Decision aids that  
31 support decisions about prenatal testing for down syndrome: an environmental scan.  
32 *BMC Med Inform Decis Mak* 2015;15:76.  
33  
34 111 Liddy C, Hogel M, Blazkho V, *et al.* The current state of electronic consultation and  
35 electronic referral systems in Canada: an environmental scan. *Stud Health Technol*  
36 *Inform* 2015;209:75-83.  
37  
38 112 Liddy C, Mill K. An environmental scan of policies in support of chronic disease  
39 self-management in Canada. *Chronic Dis Inj Can* 2014;34:55-63.  
40  
41 113 Luke A, Doucet S, Azar R. Paediatric patient navigation models of care in Canada:  
42 An environmental scan. *Paediatr Child Health* 2018;23:e46-55.  
43  
44 114 Mansell K, Edmunds K, Guirguis L. Pharmacists' scope of practice: supports for  
45 Canadians with diabetes. *Can J Diabetes* 2017;41:558–62.  
46  
47 115 McDonald M, Acri M. Mental health services for maternal depression: a need for  
48 system-level change. *Soc Work Ment Health* 2018;16:630–46.  
49  
50  
51  
52  
53  
54  
55  
56  
57  
58  
59  
60

- 1  
2  
3 116 Mew EJ, Ritchie SD, VanderBurgh D, *et al.* An environmental scan of emergency  
4 response systems and services in remote First Nations communities in Northern  
5 Ontario. *Int J Circumpolar Health* 2017;76:1320208.  
6  
7  
8 117 Mitchell AM, King DK, Kameg B, *et al.* An environmental scan of the role of  
9 nurses in preventing fetal alcohol spectrum disorders. *Issues Ment Health Nurs*  
10 2018;39:151–8.  
11  
12 118 Moore C, Lee J, Milligan J, *et al.* Physical activity as medicine among family health  
13 teams: an environmental scan of physical activity services in an interdisciplinary  
14 primary care setting. *Appl Physiol Nutr Metab* 2015;40:302-5.  
15  
16 119 Morton G, Walker-Dilks C, Baldassarre F, *et al.* Delivery of brachytherapy for  
17 cervical cancer: organisational and technical advice to facilitate high-quality care.  
18 *Clin Oncol* 2010;22:605–14.  
19  
20  
21 120 Munce SEP, Laan RV, Levy C, *et al.* Systems analysis of community and health  
22 services for acquired brain injury in Ontario, Canada. *Brain Inj* 2014;28:1042–51.  
23  
24 121 O'Mahony J, Clark N. Immigrant women and mental health care: findings from an  
25 environmental scan. *Issues Ment Health Nurs* 2018;39:924–34. 1479903  
26  
27  
28 122 O'Campo W, Geransar R, Clayden N, *et al.* Environmental scan of infection  
29 prevention and control practices for containment of hospital-acquired infectious  
30 disease outbreaks in acute care hospital settings across Canada. *Am J Infect Control*  
31 2017;45:1116–26.  
32  
33 123 Patel J, Salit IE, Berry MJ, *et al.* Environmental scan of anal cancer screening  
34 practices: worldwide survey results. *Cancer Med* 2014;3:1052–61.  
35  
36 124 Porterfield DS, Hinnant LW, Kane H, *et al.* Linkages between clinical practices and  
37 community organizations for prevention: a literature review and environmental  
38 scan. *Am J Public Health* 2012;42:S163-S171.  
39  
40  
41 125 Poulin P, Chapman K, McGahan L, *et al.* Preoperative skin antiseptics for  
42 preventing surgical site infections: what to do?/Antiseptiques preopératoires pour la  
43 peau afin de prévenir les infections du site opératoire: que faire? *ORNAC J*  
44 2014;32:12–29.  
45  
46 126 Reitmanova S, Gustafson DL. Primary mental health care information and services  
47 for St. John's visible minority immigrants: gaps and opportunities. *Issues Ment*  
48 *Health Nurs* 2009;30:615–23.  
49  
50  
51 127 Richard L, Furler J, Densley K, *et al.* Equity of access to primary healthcare for  
52 vulnerable populations: the IMPACT international online survey of innovations. *Int*  
53 *J Equity Health* 2016;15:64  
54  
55  
56  
57  
58  
59  
60

- 1  
2  
3 128 Rosa Fortin M-M, Brown C, Ball GD, *et al.* Weight management in Canada: an  
4 environmental scan of health services for adults with obesity. *BMC Health Serv Res*  
5 2014;14:69.  
6  
7  
8 129 Scime NV, Burke SM. Environmental scan of breastfeeding resources in Canadian  
9 NICUs. *JOGNN* 2018;47:202–13.  
10  
11 130 Silva GS, Farrell S, Shandra E, *et al.* The status of telestroke in the United States: a  
12 survey of currently active stroke telemedicine programs. *Stroke* 2012;43:2078–85.  
13  
14 131 Tark A, Agarwal M, Dick AW, *et al.* Variations in physician orders for life-  
15 sustaining treatment program across the nation: environmental scan. *J Palliat Med*  
16 2019;22:1032-8.  
17  
18 132 Vandenberg T, Coakley N, Nayler J, *et al.* A framework for the organization and  
19 delivery of systemic treatment. *Curr Oncol* 2009;16:2-15.  
20  
21 133 Whitton A, Warde P, Sharpe M, *et al.* Organisational standards for the delivery of  
22 intensity-modulated radiation therapy in Ontario. *Clin Oncol* 2009;21:192–203.  
23  
24 134 Wijeyesundera HC, Trubiani G, Abrahamyan L, *et al.* Specialized multi-disciplinary  
25 heart failure clinics in Ontario, Canada: an environmental scan. *BMC Health Serv*  
26 *Res* 2012;12:236.  
27  
28 135 Wittal DM. Bridging the gap from the oncology setting to community care through  
29 a cross-Canada environmental scan. *Can Oncol Nurs J Rev Can Nurs Oncol*  
30 2018;28:38–45.  
31  
32 136 Wittich W, Höbler F, Jarry J, *et al.* Recommendations for successful sensory  
33 screening in older adults with dementia in long-term care: a qualitative  
34 environmental scan of Canadian specialists. *BMJ Open* 2018;8:e019451.  
35  
36 137 Wolff JL, Kim VS, Mintz S, *et al.* An environmental scan of shared access to patient  
37 portals. *JAMIA* 2018;25:408–12.  
38  
39 138 Wurz A, Daeggelmann J, Albinati N, *et al.* Physical activity programs for children  
40 diagnosed with cancer: an international environmental scan. *Support Care Cancer*  
41 2019;27:1153–62.  
42  
43 139 Yergens D, Fradgley E, Aiyar R, *et al.* An environmental scan of medical  
44 assessment units in Canada. *Healthc Q* 2014;17:28–33.  
45  
46 140 Archer NP, Fevrier-Thomas U, Lokker C, *et al.* *Electronic personal health records:*  
47 *an environmental scan.* Hamilton, Ontario: McMaster eBusiness Research Centre,  
48 McMaster University, 2010. <https://macsphere.mcmaster.ca/handle/11375/5345>  
49 (Accessed Jan 2021).  
50  
51  
52  
53  
54  
55  
56  
57  
58  
59  
60

- 1  
2  
3  
4  
5  
6  
7  
8  
9  
10  
11  
12  
13  
14  
15  
16  
17  
18  
19  
20  
21  
22  
23  
24  
25  
26  
27  
28  
29  
30  
31  
32  
33  
34  
35  
36  
37  
38  
39  
40  
41  
42  
43  
44  
45  
46  
47  
48  
49  
50  
51  
52  
53  
54  
55  
56  
57  
58  
59  
60
- 141 Association of Maternal & Child Health Programs. *Environmental scan: how state title v programs are responding to autism spectrum disorder and other developmental disabilities*. Washington, DC: Association of Maternal & Child Health Programs, 2011.  
[http://www.amchp.org/programsandtopics/CYSHCN/resources/Documents/FINAL\\_2011%20Autism%20Environmental%20Scan.pdf](http://www.amchp.org/programsandtopics/CYSHCN/resources/Documents/FINAL_2011%20Autism%20Environmental%20Scan.pdf). (Accessed Jan 2021).
- 142 Bandali F. *Breastfeeding guidelines, practices and services in Alberta Health Services-an environmental scan*. Edmonton, Alberta: Alberta Health Services, 2014.  
<https://www.albertahealthservices.ca/assets/info/hp/hcf/if-hp-hcf-bf-envscan.pdf>. (Accessed Jan 2021).
- 143 Bella M, Cobb E, Rothstein J, *et al*. *Health supports for consumers with chronic conditions*. Hamilton, New Jersey: The Centre for Health Care Strategies, Inc., 2005. <http://www.chcs.org/media/ESMVPFINAL.pdf>. (Accessed Jan 2021).
- 144 Blackman N. *Chronic Disease and Injury Prevention Programming for Canada's Indigenous Population* [dissertation]. Walden Dissertation and Doctoral Studies, Walden University, 2018.  
<https://scholarworks.waldenu.edu/cgi/viewcontent.cgi?article=6444&context=dissertations>. (Accessed Feb 2021)
- 145 Boonyasai R, Ijagbemi O, Pham J, *et al*. *Improving the emergency department discharge process: environmental scan report*. Rockville, Maryland: Agency for Healthcare Research and Quality, 2014.  
<https://www.ahrq.gov/sites/default/files/wysiwyg/professionals/systems/hospital/edenvironmentalscan/edenvironmentalscan.pdf>. (Accessed Feb 2021).
- 146 Campos C, Manning L. *Improving access project environmental scan report*. Winnipeg, Manitoba: Brandon Regional Health Authority, 2006.  
<https://ninecircles.ca/wp-content/uploads/2017/04/Environmental-Scan-Final-Report.pdf>. (Accessed Feb 2021).
- 147 Cowling T, Dolcine B. *Point-of-care testing*. Ottawa, Ontario: Canadian Agency for Drugs and Technologies in Health (CADTH), 2017.  
[https://www.cadth.ca/sites/default/files/pdf/es0308\\_point\\_of\\_care\\_testing.pdf](https://www.cadth.ca/sites/default/files/pdf/es0308_point_of_care_testing.pdf). (Accessed Feb 2021)
- 148 Deshpande A, Khoja S, Lorca J, *et al*. *Asynchronous telehealth: systematic review of analytic studies and environmental scan of relative initiatives*. Ottawa, Ontario: Canadian Agency for Drugs and Technologies in Health (CADTH), 2008a.  
<https://www.cadth.ca/asynchronous-telehealth-systematic-review-analytic-studies-and-environmental-scan-relevant-0>. (Accessed Feb 2021).
- 149 Deshpande A, Khoja S, McKibbin A, *et al*. *telehealth for acute stroke management (telestroke): systematic review and environmental scan*. Ottawa, Ontario: Canadian Agency for Drugs and Technologies in Health (CADTH), 2008b.

- 1  
2  
3 [https://www.cadth.ca/sites/default/files/pdf/456\\_Telestroke\\_to\\_e.pdf](https://www.cadth.ca/sites/default/files/pdf/456_Telestroke_to_e.pdf). (Accessed Feb  
4 2021).  
5  
6  
7 150 Dietitians of Canada. *Dietitians in primary health care: a pan-Canadian*  
8 *environmental scan*. Toronto, Ontario: Dietitians of Canada, 2018.  
9 [https://www.dietitians.ca/DietitiansOfCanada/media/Documents/Resources/2018-](https://www.dietitians.ca/DietitiansOfCanada/media/Documents/Resources/2018-Executive-Summary-Dietitians-in-Primary-Health-Care-A-Pan-Canadian-Environmental-Scan.pdf)  
10 [Executive-Summary-Dietitians-in-Primary-Health-Care-A-Pan-Canadian-](https://www.dietitians.ca/DietitiansOfCanada/media/Documents/Resources/2018-Executive-Summary-Dietitians-in-Primary-Health-Care-A-Pan-Canadian-Environmental-Scan.pdf)  
11 [Environmental-Scan.pdf](https://www.dietitians.ca/DietitiansOfCanada/media/Documents/Resources/2018-Executive-Summary-Dietitians-in-Primary-Health-Care-A-Pan-Canadian-Environmental-Scan.pdf). (Accessed Feb 2021).  
12  
13  
14 151 Forsberg VC, Peters R, Napoles A, *et al*. *Environmental scan and literature review:*  
15 *factors that influence preventive service utilization among children covered by*  
16 *medicaid and CHIP*. Baltimore, Maryland: The Urban Institute, 2014.  
17 [https://www.urban.org/sites/default/files/publication/24716/413236-Factors-that-](https://www.urban.org/sites/default/files/publication/24716/413236-Factors-that-Influence-Preventive-Service-Utilization-among-Children-Covered-by-Medicaid-and-CHIP.pdf)  
18 [Influence-Preventive-Service-Utilization-among-Children-Covered-by-Medicaid-](https://www.urban.org/sites/default/files/publication/24716/413236-Factors-that-Influence-Preventive-Service-Utilization-among-Children-Covered-by-Medicaid-and-CHIP.pdf)  
19 [and-CHIP.pdf](https://www.urban.org/sites/default/files/publication/24716/413236-Factors-that-Influence-Preventive-Service-Utilization-among-Children-Covered-by-Medicaid-and-CHIP.pdf). (Accessed Feb 2021).  
20  
21  
22 152 Garland S. *Health interventions in ambulatory cancer care centres*. Ottawa,  
23 Ontario: Canadian Agency for Drugs and Technologies in Health (CADTH), 2015.  
24 <https://cadth.ca/health-interventions-ambulatory-cancer-care-centres>. (Accessed Feb  
25 2021).  
26  
27  
28 153 Great Plains Quality Innovation Network. *Adverse drug events and medication*  
29 *safety environmental scan overview*. Lincoln, NE: Great Plains Quality Innovation  
30 Network, 2014. [https://greatplainsqin.org/wp-](https://greatplainsqin.org/wp-content/uploads/2014/10/ade_environmental_scan_final1.pdf)  
31 [content/uploads/2014/10/ade\\_environmental\\_scan\\_final1.pdf](https://greatplainsqin.org/wp-content/uploads/2014/10/ade_environmental_scan_final1.pdf). (Accessed Feb 2021).  
32  
33  
34 154 HealthTech Solutions, LLC. *Alaska environmental scan: final report*. State of  
35 Alaska, Department of Health and Social Services, 2018.  
36 [http://dhss.alaska.gov/HealthyAlaska/Documents/Initiatives/Environmental\\_Scan\\_R](http://dhss.alaska.gov/HealthyAlaska/Documents/Initiatives/Environmental_Scan_Report.pdf)  
37 [eport.pdf](http://dhss.alaska.gov/HealthyAlaska/Documents/Initiatives/Environmental_Scan_Report.pdf). (Accessed Feb 2021).  
38  
39  
40 155 Hochman M, Bourgoin A, Saluja S, *et al*. *Environmental scan of primary care-*  
41 *based efforts to reduce readmissions*. Rockville, Maryland: Agency for Healthcare  
42 Research and Quality, 2019.  
43 [https://www.ahrq.gov/sites/default/files/wysiwyg/patient-safety/primary-care-based-](https://www.ahrq.gov/sites/default/files/wysiwyg/patient-safety/primary-care-based-efforts.pdf)  
44 [efforts.pdf](https://www.ahrq.gov/sites/default/files/wysiwyg/patient-safety/primary-care-based-efforts.pdf). (Accessed Feb 2021).  
45  
46  
47 156 Loorand-Stiver L. *Falls prevention strategies in adult outpatient or community-*  
48 *based mental health and/or addiction programs: environmental scan*. Ottawa,  
49 Ontario: Canadian Agency for Drugs and Technologies in Health (CADTH), 2012a.  
50 [https://www.cadth.ca/sites/default/files/pdf/ES\\_MH\\_Fall\\_Preven\\_Rev\\_e.pdf](https://www.cadth.ca/sites/default/files/pdf/ES_MH_Fall_Preven_Rev_e.pdf).  
51 (Accessed Feb 2021).  
52  
53  
54 157 Loorand-Stiver L. *Transitioning long-term ventilator-dependent patients out of the*  
55 *intensive care unit — an environmental scan*. Ottawa, Ontario: Canadian Agency  
56 for Drugs and Technologies in Health (CADTH), 2012b.  
57 [https://www.cadth.ca/sites/default/files/pdf/Chronic\\_Ventilator-es-33\\_e.pdf](https://www.cadth.ca/sites/default/files/pdf/Chronic_Ventilator-es-33_e.pdf).  
58 (Accessed Feb 2021).  
59  
60



- 1  
2  
3 158 Mason J, Ford C. *Feeding and swallowing assessment services for pediatric*  
4 *populations in Canada: service provision, practice models, and assessment tools.*  
5 Ottawa, Ontario: Canadian Agency for Drugs and Technologies in Health  
6 (CADTH), 2017.  
7 [https://www.cadth.ca/sites/default/files/pdf/ES0306\\_Feeding\\_Swallowing\\_Assessment%20Services.pdf](https://www.cadth.ca/sites/default/files/pdf/ES0306_Feeding_Swallowing_Assessment%20Services.pdf). (Accessed Feb 2021).  
8  
9  
10  
11 159 McGrath DP, Newton DA, Hartling DL, *et al.* *Advancing the evolution insights into*  
12 *the state of e-mental health services in Canada.* Ottawa, Ontario: Mental Health  
13 Commission of Canada, 2017.  
14 [https://www.mentalhealthcommission.ca/sites/default/files/2017-](https://www.mentalhealthcommission.ca/sites/default/files/2017-08/eMH%20Environmental%20Scan_FINAL%20EN.pdf)  
15 [08/eMH%20Environmental%20Scan\\_FINAL%20EN.pdf](https://www.mentalhealthcommission.ca/sites/default/files/2017-08/eMH%20Environmental%20Scan_FINAL%20EN.pdf). (Accessed Feb 2021)  
16  
17  
18 160 Moran GE, Snyder CM, Noftsinger RF, *et al.* *Implementing medication-assisted*  
19 *treatment for opioid use disorder in rural primary care: environmental scan volume*  
20 *1.* Rockville, Maryland: Agency for Healthcare Research and Quality (ARHQ),  
21 2017. [https://tbhcoe.matrc.org/wp-content/uploads/2019/12/implementing-](https://tbhcoe.matrc.org/wp-content/uploads/2019/12/implementing-medication-assisted-treatment-opioid-disorder-rural-primary-care-environmental-scan-volume-one-2017.pdf?9d4e56&9d4e56)  
22 [medication-assisted-treatment-opioid-disorder-rural-primary-care-environmental-](https://tbhcoe.matrc.org/wp-content/uploads/2019/12/implementing-medication-assisted-treatment-opioid-disorder-rural-primary-care-environmental-scan-volume-one-2017.pdf?9d4e56&9d4e56)  
23 [scan-volume-one-2017.pdf?9d4e56&9d4e56](https://tbhcoe.matrc.org/wp-content/uploads/2019/12/implementing-medication-assisted-treatment-opioid-disorder-rural-primary-care-environmental-scan-volume-one-2017.pdf?9d4e56&9d4e56). (Accessed Feb 2021)  
24  
25  
26 161 Morrison A. *H1N1 and seasonal influenza vaccine practices across Canadian*  
27 *jurisdictions.* Ottawa, Ontario: Canadian Agency for Drugs and Technologies in  
28 Health (CADTH), 2009.  
29 [https://www.cadth.ca/sites/default/files/pdf/ES6\\_H1N1\\_and\\_Seasonal\\_Flu\\_Vaccine](https://www.cadth.ca/sites/default/files/pdf/ES6_H1N1_and_Seasonal_Flu_Vaccine_Practices_e.pdf)  
30 [\\_Practices\\_e.pdf](https://www.cadth.ca/sites/default/files/pdf/ES6_H1N1_and_Seasonal_Flu_Vaccine_Practices_e.pdf). (Accessed Feb 2021).  
31  
32  
33 162 Morrison A, Dowler J. *Newborn screening for disorders and abnormalities in*  
34 *Canada.* Ottawa, Ontario: Canadian Agency for Drugs and Technologies in Health  
35 (CADTH), 2011. [https://cadth.ca/sites/default/files/pdf/Newborn\\_Screening\\_es-](https://cadth.ca/sites/default/files/pdf/Newborn_Screening_es-26_e.pdf)  
36 [26\\_e.pdf](https://cadth.ca/sites/default/files/pdf/Newborn_Screening_es-26_e.pdf). (Accessed Feb 2021).  
37  
38  
39 163 Murzin K, Furlotte C. *HIV and aging: a 2013 environmental scan of programs and*  
40 *services in Canada – community report.* The National Coordinating Committee on  
41 HIV and Aging, 2015. [http://realizecanada.org/wp-content/uploads/Community-](http://realizecanada.org/wp-content/uploads/Community-Report-EN-Web-Ready-Low-Resolution.pdf)  
42 [Report-EN-Web-Ready-Low-Resolution.pdf](http://realizecanada.org/wp-content/uploads/Community-Report-EN-Web-Ready-Low-Resolution.pdf). (Accessed Feb 2021).  
43  
44  
45 164 Ndegwa S. *Support services for cardiac rehabilitation in Canada.* Ottawa, Ontario:  
46 Canadian Agency for Drugs and Technologies in Health, 2010.  
47 <https://www.cadth.ca/support-services-cardiac-rehabilitation-canada>. (Accessed  
48 Feb 2021).  
49  
50  
51 165 Ndegwa S. *Initiatives for healthy aging in Canada.* Ottawa, Ontario: Canadian  
52 Agency for Drugs and Technologies in Health, 2011.  
53 <https://www.cadth.ca/initiatives-healthy-aging-canada>. (Accessed Feb 2021).  
54  
55  
56 166 Ndegwa S, Dolcine B, Frey N, *et al.* *Access to and availability of non-*  
57 *pharmacological treatments for chronic non-cancer pain in Canada: an*  
58 *environmental scan.* Ottawa, Ontario: Canadian Agency for Drugs and  
59  
60

- Technologies in Health (CADTH), 2018.  
[https://www.cadth.ca/sites/default/files/pdf/es0313\\_access-to-non-pharmacological-treatment-of-pain.pdf](https://www.cadth.ca/sites/default/files/pdf/es0313_access-to-non-pharmacological-treatment-of-pain.pdf)
- 167 Paccagnan J, Kania-Richmond A, Kelly S. *An environmental scan of programs and education tools for the management of osteoarthritis*. Alberta Health Services 2017.  
<https://www.albertahealthservices.ca/assets/about/scn/ahs-scn-bjh-oa-programs-and-education-enviro-scan-report.pdf>. (Accessed Feb 2021).
- 168 Seal K, Quay T, Campbell K. *Ankyloglossia diagnosis and treatment in Canada: an environmental scan*. Ottawa, Ontario: Canadian Agency for Drugs and Technologies in Health (CADTH), 2018. <https://www.cadth.ca/ankyloglossia-diagnosis-and-treatment-canada-environmental-scan>. (Accessed Feb 2021).
- 169 Smith E. *Environmental scan assessing the activities engaged in by health units and community health centres to address access and equity in their program delivery and services*. Toronto, Ontario: Ontario Public Health Association, Access and Equity Committee, 2001.  
<https://opha.on.ca/OPHA/media/Resources/Resource%20Documents/scan.pdf?ext=.pdf>. (Accessed Feb 2021).
- 170 Medstar Health Research Institute, Smith K, Baker K, *et al*. *Guide to improving patient safety in primary care settings by engaging patients and families- environmental scan report*. Rockville, Maryland: Agency for Healthcare Research and Quality (AHRQ), 2017.  
<https://www.ahrq.gov/sites/default/files/wysiwyg/professionals/quality-patient-safety/patient-family-engagement/pfprimarycare/envscan-report.pdf>. (Accessed Feb 2021).
- 171 Topfer L-A, Spry C. *Detection and diagnosis of sepsis in rural and remote areas of Canada: an environmental scan*. Ottawa, Ontario: Canadian Agency for Drugs and Technologies in Health (CADTH), 2019.  
<https://www.cadth.ca/sites/default/files/pdf/es0327-remote-sepsis.pdf>
- 172 Tran K, Polisena J, Coyle D, *et al*. *Home telehealth for chronic disease management*. Ottawa, Ontario: Canadian Agency for Drugs and Technologies in Health (CADTH), 2008.  
[https://www.cadth.ca/sites/default/files/pdf/H0475\\_Home\\_Telehealth\\_tr\\_e.pdf](https://www.cadth.ca/sites/default/files/pdf/H0475_Home_Telehealth_tr_e.pdf)  
(Accessed Feb 2021).
- 173 Wells C, Dolcine B, Frey N. *Programs for the treatment of opioid addiction: an environmental scan*. Ottawa, Ontario: Canadian Agency for Drugs and Technologies in Health (CADTH), 2019.  
<https://cadth.ca/sites/default/files/es/es0335-programs-for-treatment-opioid-addiction-in-Canada.pdf> (Accessed Feb 2021).
- 174 Young C, Helis E, Williams D. *Internet-delivered cognitive behavioural therapy for major depressive disorder and anxiety disorders: an environmental scan*. Ottawa,

- 1  
2  
3 Ontario: Canadian Agency for Drugs and Technologies in Health (CADTH), 2018.  
4 [https://cadth.ca/sites/default/files/pdf/ES0331\\_iCBT\\_for\\_Major\\_Depression\\_and\\_A](https://cadth.ca/sites/default/files/pdf/ES0331_iCBT_for_Major_Depression_and_Anxiety.pdf)  
5 [nxiety.pdf](https://cadth.ca/sites/default/files/pdf/ES0331_iCBT_for_Major_Depression_and_Anxiety.pdf). (Accessed Feb 2021).  
6  
7  
8 175 Yurick J, Allatt D. *Supportive care framework report*. Alberta Health Services,  
9 Cancer Control Alberta, 2016.  
10 [https://www.albertahealthservices.ca/assets/info/hp/cancer/if-hp-cancer-supportive-](https://www.albertahealthservices.ca/assets/info/hp/cancer/if-hp-cancer-supportive-care-framework-report.pdf)  
11 [care-framework-report.pdf](https://www.albertahealthservices.ca/assets/info/hp/cancer/if-hp-cancer-supportive-care-framework-report.pdf). (Accessed Feb 2021).  
12  
13 176 Blanken RL, Liff A. *Facing the future: preparing your association to thrive:*  
14 *emerging trends from the ASAE Foundation's ongoing environmental scan research*.  
15 Washington, DC: American Society of Association Executives, 1999.  
16  
17 177 Ghoshal S. environmental scanning in Korean firms: organizational isomorphism in  
18 action. *J Int Bus Stud* 1988;19:69-86.  
19  
20 178 Hatch TF, Pearson TG. Using environmental scans in educational needs assessment.  
21 *J Contin Educ Health Prof* 1998;18:179-84.  
22  
23 179 Bombard Y, Baker GR, Orlando E, *et al*. Engaging patients to improve quality of  
24 care: a systematic review. *Implement Sci* 2018;13:98.  
25  
26 180 Nygaard A, Halvorsrud L, Linnerud S, *et al*. The James Lind Alliance process  
27 approach: scoping review. *BMJ Open* 2019;9:e027473.  
28  
29 181 Solberg LI, Elward KS, Phillips WR, *et al*. How can primary care cross the quality  
30 chasm? *Ann Fam Med* 2009;7:164-9.  
31  
32 182 Morrison J. Environmental Scanning. In: In M. A. Whitely, J. D. Porter, and R. H.  
33 Fenske ed. *A Primer For New Institutional Researchers*. Tallahassee, Florida: : The  
34 Association for Institutional Research 1992. 86-99.  
35 <http://horizon.unc.edu/courses/papers/enviroscan/> (Accessed Feb 2021).  
36  
37 183. Society for Human Resource Management. Strategic planning: what are the basics  
38 of environmental scanning? 2012. [www.shrm.org/resourcesandtools/tools-and-](http://www.shrm.org/resourcesandtools/tools-and-samples/hr-qa/pages/cms_021670.aspx)  
39 [samples/hr-qa/pages/ cms\\_021670.aspx](http://www.shrm.org/resourcesandtools/tools-and-samples/hr-qa/pages/cms_021670.aspx).  
40  
41 184. Harris H, Martin C. Environmental scanning in the Australian manufacturing  
42 sector: a discussion of some early results. In: Sohal A, Cooney R. ed. Proceedings  
43 of the Sixth International Research Conference on Quality Innovation and  
44 Knowledge Management 2002; 17-20 Feb Kuala Lumpur. P. 659-66  
45  
46  
47  
48  
49  
50  
51  
52  
53  
54  
55  
56  
57  
58  
59  
60

1  
2  
3  
4  
5  
6  
7  
8  
9  
10  
11  
12  
13  
14  
15  
16  
17  
18  
19  
20  
21  
22  
23  
24  
25  
26  
27  
28  
29  
30  
31  
32  
33  
34  
35  
36  
37  
38  
39  
40  
41  
42  
43  
44  
45  
46  
47  
48  
49  
50  
51  
52  
53  
54  
55  
56  
57  
58  
59  
60

Identification

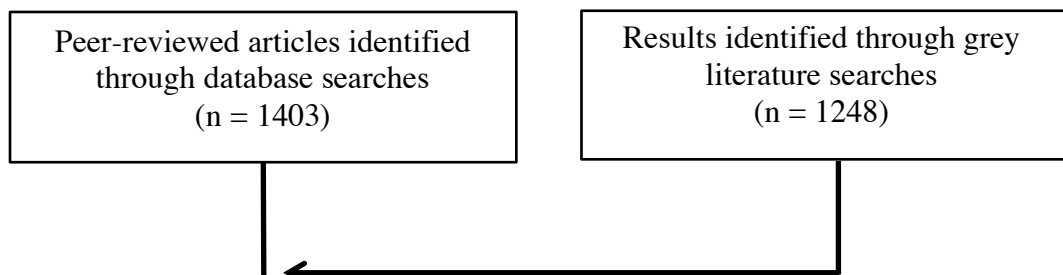

Screening

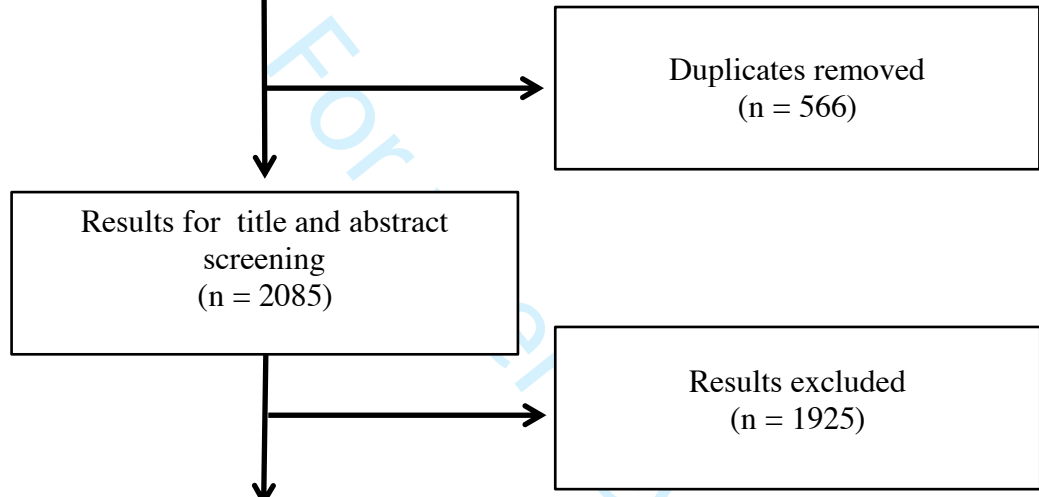

Eligibility

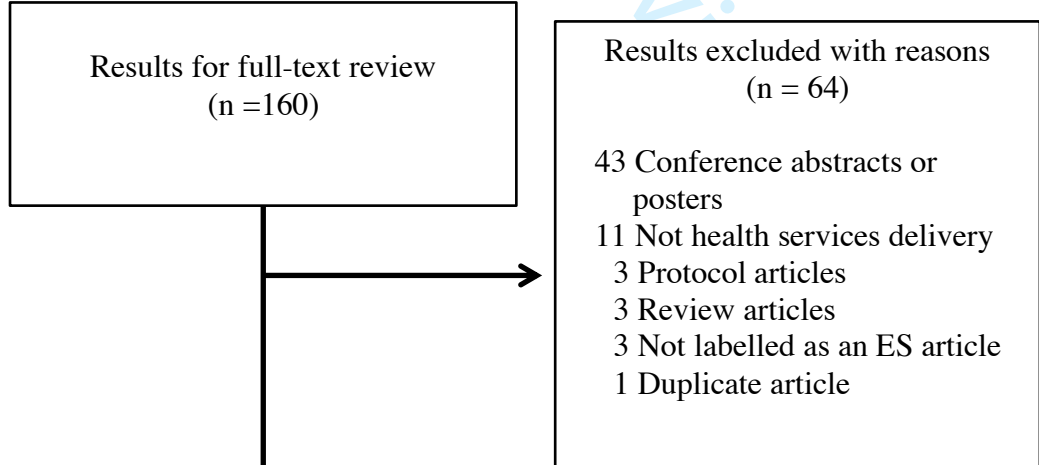

Included

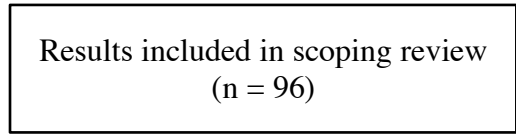

FOR PEER REVIEW

1  
2  
3  
4  
5  
6  
7  
8  
9  
10  
11  
12  
13  
14  
15  
16  
17  
18  
19  
20  
21  
22  
23  
24  
25  
26  
27  
28  
29  
30  
31  
32  
33  
34  
35  
36  
37  
38  
39  
40  
41  
42  
43  
44  
45  
46  
47  
48  
49  
50  
51  
52  
53  
54  
55  
56  
57  
58  
59  
60

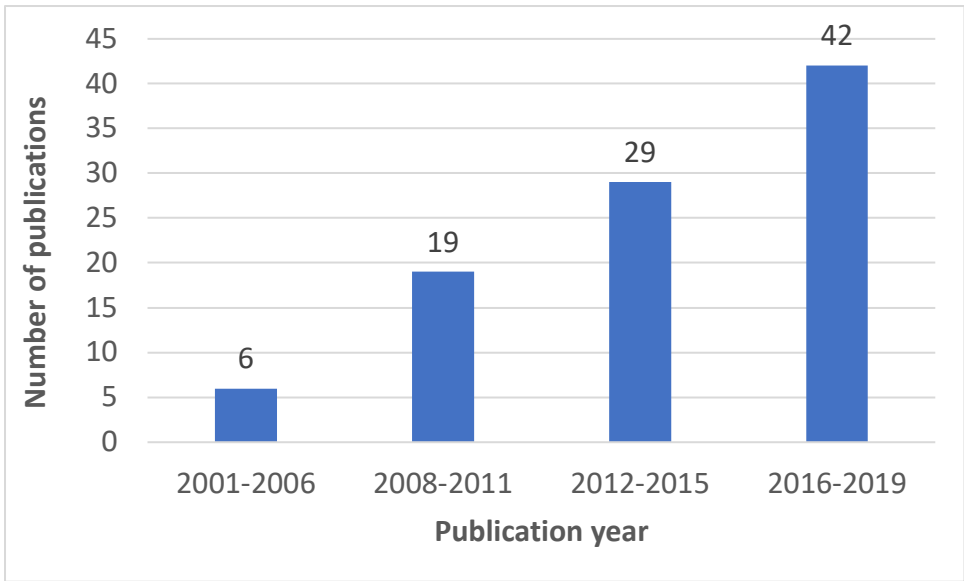

peer review only

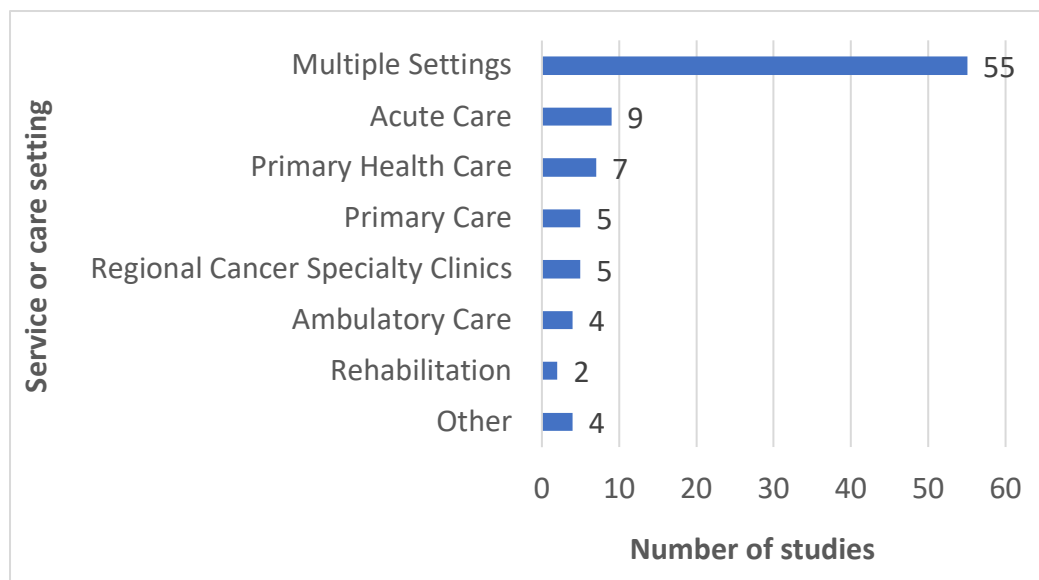

peer review only

1  
2  
3  
4  
5  
6  
7  
8  
9  
10  
11  
12  
13  
14  
15  
16  
17  
18  
19  
20  
21  
22  
23  
24  
25  
26  
27  
28  
29  
30  
31  
32  
33  
34  
35  
36  
37  
38  
39  
40  
41  
42  
43  
44  
45  
46  
47  
48  
49  
50  
51  
52  
53  
54  
55  
56  
57  
58  
59  
60

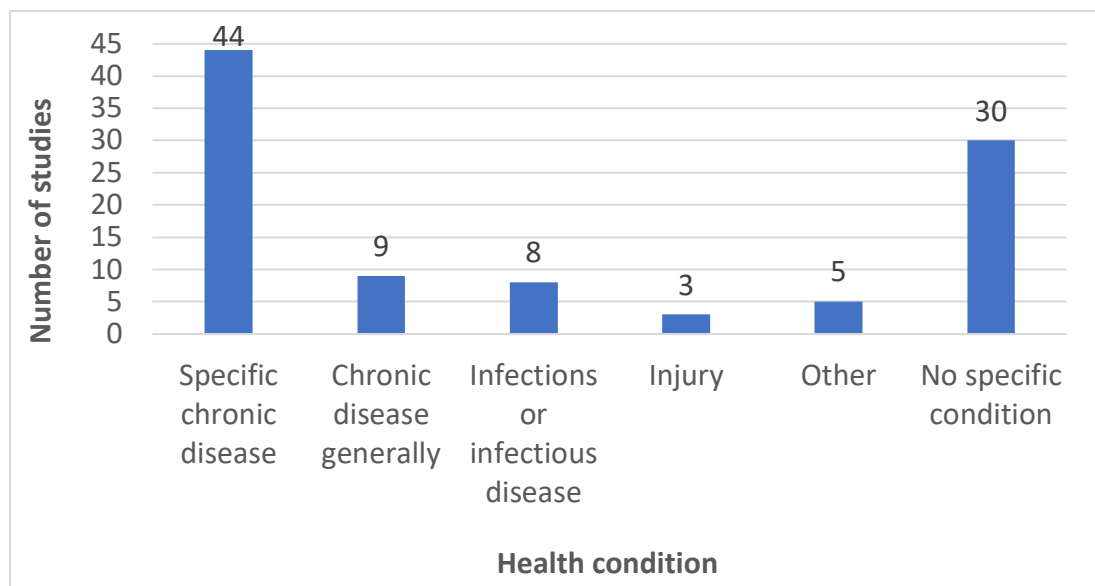

peer review only

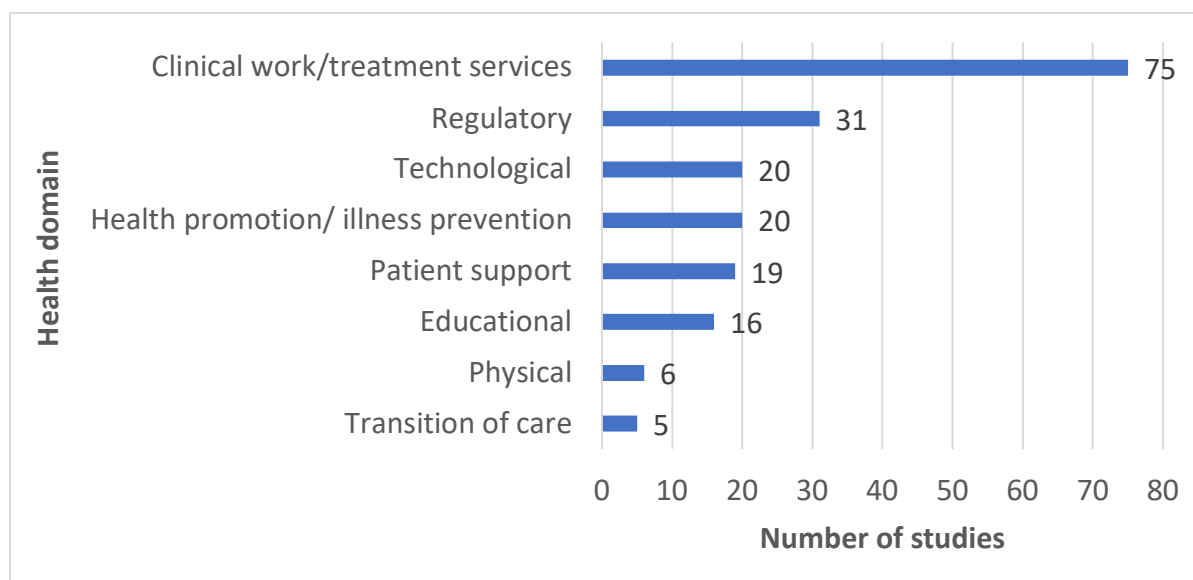

peer review only



1  
2  
3  
4  
5  
6  
7  
8  
9  
10  
11  
12  
13  
14  
15  
16  
17  
18  
19  
20  
21  
22  
23  
24  
25  
26  
27  
28  
29  
30  
31  
32  
33  
34  
35  
36  
37  
38  
39  
40  
41  
42  
43  
44  
45  
46  
47  
48  
49  
50  
51  
52  
53  
54  
55  
56  
57  
58  
59  
60

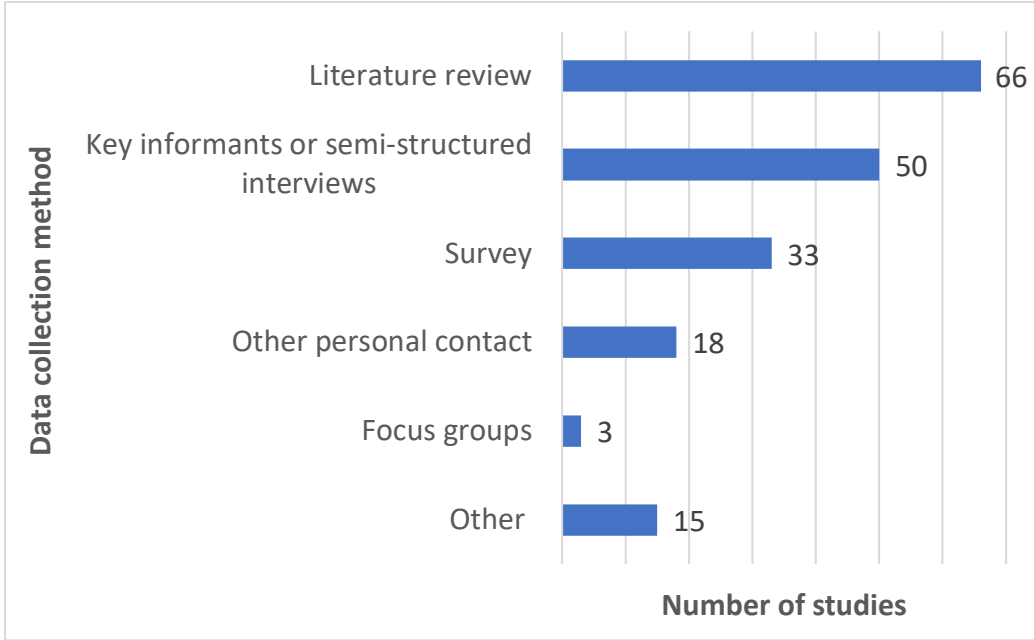

Peer review only

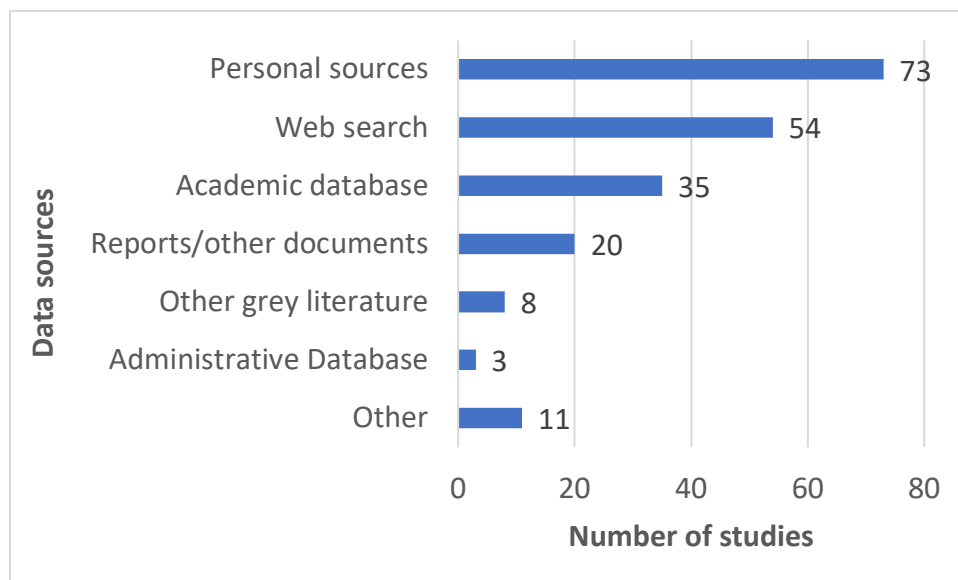

peer review only

1  
2  
3  
4  
5  
6  
7  
8  
9  
10  
11  
12  
13  
14  
15  
16  
17  
18  
19  
20  
21  
22  
23  
24  
25  
26  
27  
28  
29  
30  
31  
32  
33  
34  
35  
36  
37  
38  
39  
40  
41  
42  
43  
44  
45  
46  
47  
48  
49  
50  
51  
52  
53  
54  
55  
56  
57  
58  
59  
60

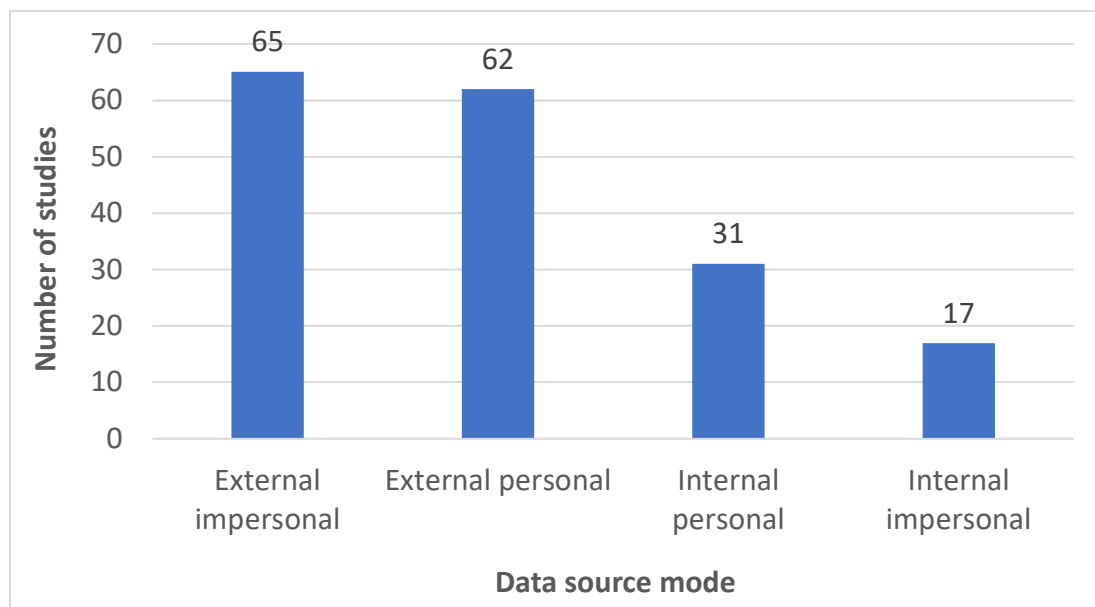

Peer review only

## Supplementary File 1

---

### Search Strategy for Medline

---

- 1 environment\* scan\$4.ti,ab,kf.
- 2 exp "Delivery of Health Care"/
- 3 exp Health Services/ and (administer\* or delegat\* or deliver\* or distribut\* or  
provide or providing or provision).ti,ab.
- 4 ((care or healthcare) adj4 (accessib\* or availab\* or disparit\* or equit\* or equalit\* or  
inaccessib\* or inequalit\*)).ti,ab,kf.
- 5 ((care or healthcare) adj4 (administer\* or delegat\* or deliver\* or distribut\* or  
provide or providing or provision)).ti,ab,kf.
- 6 ((care or healthcare) adj reform\*).ti,ab,kf.
- 7 case management.ti,ab,kf.
- 8 (e health or e mental health or ehealth or m health or mhealth or mobile health or  
telehealth or telemedicine).ti,ab,kf.
- 9 (health care adj4 (accessib\* or availab\* or disparit\* or equit\* or equalit\* or  
inaccessib\* or inequalit\*)).ti,ab,kf.
- 10 (health care adj4 (administer\* or delegat\* or deliver\* or distribut\* or provide or  
providing or provision)).ti,ab,kf.
- 11 (health adj2 reform\*).ti,ab,kf.
- 12 managed care.ti,ab,kf.
- 13 practice pattern\*.ti,ab,kf.

- 1  
2  
3  
4 14 prescribing pattern\*.ti,ab,kf.  
5  
6 15 ((program\* or service\*) adj4 (accessib\* or availab\* or disparit\* or equit\* or equalit\*  
7  
8 or inaccessib\* or inequalit\*)).ti,ab,kf.  
9  
10  
11 16 ((program\* or service\*) adj4 (administer\* or delegat\* or deliver\* or distribut\* or  
12  
13 provide or providing or provision)).ti,ab,kf.  
14  
15  
16 17 or/2-16  
17  
18  
19 18 1 and 17  
20  
21  
22  
23  
24  
25  
26  
27  
28  
29  
30  
31  
32  
33  
34  
35  
36  
37  
38  
39  
40  
41  
42  
43  
44  
45  
46  
47  
48  
49  
50  
51  
52  
53  
54  
55  
56  
57  
58  
59  
60

peer review only

## Supplementary file 2

## Selected characteristics of the peer-reviewed academic literature in the scoping review of environmental scans

| <i>Authors/ Year</i>                   | <i>Country</i> | <i>Aim/Purpose of the Study</i>                                                                                                                                                                                                                                                                                                                                                   | <i>Data Collection</i> | <i>Healthcare Setting(s)</i>                            |
|----------------------------------------|----------------|-----------------------------------------------------------------------------------------------------------------------------------------------------------------------------------------------------------------------------------------------------------------------------------------------------------------------------------------------------------------------------------|------------------------|---------------------------------------------------------|
| Abrahamyan et al. (2015) (83)          | CA             | To identify all community-based multidisciplinary wound care teams in Ontario and describe their service models.                                                                                                                                                                                                                                                                  | Mixed methods          | Multiple                                                |
| Ahmad et al. (2015) (84)               | CA             | To develop recommendations and initiatives to improve quality of oral chemotherapy delivery in Ontario.                                                                                                                                                                                                                                                                           | Qualitative            | Regional Cancer Specialty Clinics/ Centres (provincial) |
| Baezconde-Garbanati et al. (2017) (85) | US             | To assess needs, resources, and understanding attitudes toward HPV vaccination.                                                                                                                                                                                                                                                                                                   | Qualitative            | Multiple                                                |
| Bak et al. (2013) (86)                 | CA             | To describe available evidence on the effects of radiation on ambulatory infusion pumps used to deliver chemotherapy, heighten awareness of this issue within the clinical community, provide considerations for minimizing possible negative effects on patient care, and encourage the monitoring of infusion devices after exposure to radiation/electromagnetic interference. | Qualitative            | Regional cancer specialty clinics/ centres (provincial) |

1  
2  
3  
4  
5  
6  
7  
8  
9  
10  
11  
12  
13  
14  
15  
16  
17  
18  
19  
20  
21  
22  
23  
24  
25  
26  
27  
28  
29  
30  
31  
32  
33  
34  
35  
36  
37  
38  
39  
40  
41  
42  
43  
44  
45  
46  
47

**Selected characteristics of the peer-reviewed academic literature in the scoping review of environmental scans**

| <i>Authors/ Year</i>           | <i>Country</i> | <i>Aim/Purpose of the Study</i>                                                                                                                                                                                 | <i>Data Collection</i> | <i>Healthcare Setting(s)</i>                            |
|--------------------------------|----------------|-----------------------------------------------------------------------------------------------------------------------------------------------------------------------------------------------------------------|------------------------|---------------------------------------------------------|
| Bakhru et al. (2015) (87)      | US             | To evaluate the current level of diffusion of early mobilization practice and examine environmental factors that may influence its practice in U.S. intensive care units                                        | Quantitative           | Acute care                                              |
| Ball et al. (2011) (88)        | CA             | To conduct the first national ES of pediatric weight management and reflect on their role in the overall management of pediatric obesity                                                                        | Quantitative           | Multiple                                                |
| Battye & McTaggart (2003) (89) | AU             | To develop a model of allied health services delivery using the principles of primary healthcare to meet the needs of 11 culturally diverse (indigenous, non-indigenous, mixed) communities in rural Australia. | Mixed methods          | Primary health care                                     |
| Bednar et al. (2018) (90)      | US             | To inform the design of a quality improvement project to increase rates of adherence to national guidelines for cancer genetic counseling and genetic testing at three unique oncology care settings.           | Mixed methods          | Acute care                                              |
| Brouwers et al. (2009) (91)    | CA             | To describe how cancer diagnostic services should be organized, structured, and evaluated in Ontario                                                                                                            | Qualitative            | Regional cancer specialty clinics/ centres (provincial) |

### Selected characteristics of the peer-reviewed academic literature in the scoping review of environmental scans

| <i>Authors/ Year</i>        | <i>Country</i> | <i>Aim/Purpose of the Study</i>                                                                                                                                                                                        | <i>Data Collection</i> | <i>Healthcare Setting(s)</i> |
|-----------------------------|----------------|------------------------------------------------------------------------------------------------------------------------------------------------------------------------------------------------------------------------|------------------------|------------------------------|
| Carter et al. (2017) (92)   | CA             | To identify and describe health and social system navigation activities in a large urban Canadian community                                                                                                            | Mixed methods          | Multiple                     |
| Cartmell et al. (2018) (93) | US             | To identify contextually appropriate strategies for improving HPV vaccination uptake in South Carolina by conducting an ES of the barriers, facilitators, and strategies needed for improving HPV vaccination          | Qualitative            | Multiple                     |
| Chang et al. (2017) (94)    | CA             | To conduct an environmental scan of a rural primary care clinic to assess the feasibility of implementing an e-communications system between patients and clinic staff.                                                | Mixed methods          | Primary care                 |
| Davies et al. (2008) (95)   | CA             | To document the process of best practice guideline implementation by topic, to describe facilitators and barriers to implementation and to determine the impact of indicators related to process and patient outcomes. | Qualitative            | Multiple                     |
| DeGroff et al. (2014) (96)  | US             | To describe key considerations in designing a patient navigation intervention model.                                                                                                                                   | Qualitative            | Multiple                     |
| Delparte et al. (2014) (97) | CA             | To develop a customizable patient and family education resource for people with spinal cord injury                                                                                                                     | Qualitative            | Rehabilitation               |



**Selected characteristics of the peer-reviewed academic literature in the scoping review of environmental scans**

| <i>Authors/ Year</i>            | <i>Country</i> | <i>Aim/Purpose of the Study</i>                                                                                                                                                                                          | <i>Data Collection</i> | <i>Healthcare Setting(s)</i>                            |
|---------------------------------|----------------|--------------------------------------------------------------------------------------------------------------------------------------------------------------------------------------------------------------------------|------------------------|---------------------------------------------------------|
| Finnigan-Fox et al. (2017) (98) | US             | To identify available patient decision aids relating information about hospice care and compare that information with the informational needs expressed by real-world health care consumers                              | Qualitative            | Palliative care                                         |
| Fong et al. (2018) (99)         | CA             | To evaluate cancer centres for physical activity and sedentary behaviour information and infrastructure, and to evaluate the quality of the information accessible to breast cancer survivors in cancer centres          | Mixed methods          | Regional cancer specialty clinics/ centres (provincial) |
| Frost et al. (2016) (100)       | US             | To better understand the experience of sickle cell disease patients, their caregivers, and providers during care transitions to determine whether and how their needs could be met through health information technology | Qualitative            | Multiple                                                |
| Glurich et al. (2017) (101)     | US             | To update the current status and progress in advancing establishment of models for integrated oral-dental healthcare delivery for patients with, or at risk for, diabetes.                                               | Qualitative            | Primary care                                            |

1  
2  
3  
4  
5  
6  
7  
8  
9  
10  
11  
12  
13  
14  
15  
16  
17  
18  
19  
20  
21  
22  
23  
24  
25  
26  
27  
28  
29  
30  
31  
32  
33  
34  
35  
36  
37  
38  
39  
40  
41  
42  
43  
44  
45  
46  
47

### Selected characteristics of the peer-reviewed academic literature in the scoping review of environmental scans

| <i>Authors/ Year</i>          | <i>Country</i> | <i>Aim/Purpose of the Study</i>                                                                                                                                                                                     | <i>Data Collection</i> | <i>Healthcare Setting(s)</i> |
|-------------------------------|----------------|---------------------------------------------------------------------------------------------------------------------------------------------------------------------------------------------------------------------|------------------------|------------------------------|
| Goldwater et al. (2014) (102) | US             | To gain a larger understanding of the experience of Community Health Centres in the acquisition, implementation and utilization of open source EHR to achieve meaningful use and to serve their patient populations | Qualitative            | Multiple                     |
| Gustafson et al. (2008) (103) | CA             | To conduct a needs assessment of injection drug use in St. John's, NL and to identify the barriers to health and health services for people injecting drugs in the city                                             | Mixed methods          | Primary health care          |
| Hauck et al. (2008) (104)     | AU             | To develop a framework for community mental health clinicians to improve the reproductive health outcomes for women with serious mental illness.                                                                    | Qualitative            | Multiple                     |
| Hogan et al. (2014) (105)     | US             | To evaluate the effects that technology-assisted access to clinical information may have on stakeholder experiences, processes of care and health outcomes.                                                         | Qualitative            | Veterans Affairs             |
| Hogenbirk et al. (2006) (106) | CA             | To examine the current status of telehealth in Canada with respect to standards, guidelines, policies or procedures                                                                                                 | Mixed methods          | Multiple                     |

1  
2  
3  
4  
5  
6  
7  
8  
9  
10  
11  
12  
13  
14  
15  
16  
17  
18  
19  
20  
21  
22  
23  
24  
25  
26  
27  
28  
29  
30  
31  
32  
33  
34  
35  
36  
37  
38  
39  
40  
41  
42  
43  
44  
45  
46  
47

### Selected characteristics of the peer-reviewed academic literature in the scoping review of environmental scans

| <i>Authors/ Year</i>                   | <i>Country</i> | <i>Aim/Purpose of the Study</i>                                                                                                                                                                         | <i>Data Collection</i> | <i>Healthcare Setting(s)</i>           |
|----------------------------------------|----------------|---------------------------------------------------------------------------------------------------------------------------------------------------------------------------------------------------------|------------------------|----------------------------------------|
| Jeon et al. (2012) (107)               | CA             | To establish a set of guidelines for developing ambulatory chemotherapy preprinted orders in Canada.                                                                                                    | Qualitative            | Ambulatory care                        |
| Joschko et al. (2018) (108)            | CA             | To examine different eConsult services available worldwide and compare the strategies, barriers, and successes of their implementation in different health care contexts                                | Qualitative            | Multiple                               |
| Kobe et al. (2020) (109)               | US             | To systematically survey and interpret relevant self-management education programs to identify opportunities for their development specific to adolescent and young adult survivors of childhood cancer | Qualitative            | Primary health care                    |
| Leiva Portocarrero et al. (2015) (110) | CA             | To identify publicly available DAs focusing on prenatal screening/diagnosis for Down syndrome that provide effective support for decision making                                                        | Qualitative            | Not clear or not specifically reported |
| Liddy et al. (2015) (111)              | CA             | To identify current eConsultation and eReferral systems in Canada and to gain insight into the design and implementation process of existing systems.                                                   | Qualitative            | Multiple                               |

### Selected characteristics of the peer-reviewed academic literature in the scoping review of environmental scans

| <i>Authors/ Year</i>         | <i>Country</i> | <i>Aim/Purpose of the Study</i>                                                                                                                                                                                                    | <i>Data Collection</i> | <i>Healthcare Setting(s)</i>                     |
|------------------------------|----------------|------------------------------------------------------------------------------------------------------------------------------------------------------------------------------------------------------------------------------------|------------------------|--------------------------------------------------|
| Liddy & Mill (2014) (112)    | CA             | To identify existing policies, strategies and frameworks that support self-management initiatives for chronic disease in Canada.                                                                                                   | Qualitative            | Health administration/Health policy system level |
| Luke et al. (2018) (113)     | CA             | To provide other organizations with useful information when implementing paediatric navigation programs and to inform the implementation of a navigation care centre in New Brunswick for children with complex health conditions. | Qualitative            | Multiple                                         |
| Mansell et al. (2017) (114)  | CA             | To characterize pharmacists' expanded scope of practice as it relates to providing services to Canadians with diabetes                                                                                                             | Qualitative            | Multiple                                         |
| McDonald & Acri (2018) (115) | US             | To examine agency-level barriers to treatment among a poverty-impacted sample of women with depressive symptoms, as well as any supports that agencies have implemented to engage consumers into services.                         | Qualitative            | Multiple                                         |
| Mew et al. (2017) (116)      | CA             | To understand emergency response systems, services, and training in remote Nishnawbe Aski Nation First Nation communities.                                                                                                         | Qualitative            | Emergency services or response system            |

1  
2  
3  
4  
5  
6  
7  
8  
9  
10  
11  
12  
13  
14  
15  
16  
17  
18  
19  
20  
21  
22  
23  
24  
25  
26  
27  
28  
29  
30  
31  
32  
33  
34  
35  
36  
37  
38  
39  
40  
41  
42  
43  
44  
45  
46  
47

**Selected characteristics of the peer-reviewed academic literature in the scoping review of environmental scans**

| <i>Authors/ Year</i>         | <i>Country</i> | <i>Aim/Purpose of the Study</i>                                                                                                                                                                             | <i>Data Collection</i> | <i>Healthcare Setting(s)</i>                            |
|------------------------------|----------------|-------------------------------------------------------------------------------------------------------------------------------------------------------------------------------------------------------------|------------------------|---------------------------------------------------------|
| Mitchell et al. (2018) (117) | US             | To document the results of an ES of the literature, resources, and policies relevant to nursing professionals and their role in preventing alcohol-exposed pregnancies and fetal alcohol spectrum disorders | Qualitative            | Multiple                                                |
| Moore et al. (2015) (118)    | CA             | To determine the prevalence and characteristics of physical activity services offered by Family Health Teams in Ontario.                                                                                    | Qualitative            | Primary care                                            |
| Morton et al. (2010) (119)   | CA             | To provide advice on organisational and technical aspects of the delivery of brachytherapy services in Ontario, Canada.                                                                                     | Qualitative            | Regional cancer specialty clinics/ centres (provincial) |
| Munce et al. (2014) (120)    | CA             | To conduct a systems analysis on community and health services for individuals with acquired brain injury in the province of Ontario, Canada                                                                | Mixed methods          | Multiple                                                |
| Naumann et al. (2013) (56)   | CA             | To explore, summarize, and map out current services for fetal alcohol syndrome disorder in order to present a comprehensive review of service accessibility in Eastern Ontario.                             | Qualitative            | Multiple                                                |

1  
2  
3  
4  
5  
6  
7  
8  
9  
10  
11  
12  
13  
14  
15  
16  
17  
18  
19  
20  
21  
22  
23  
24  
25  
26  
27  
28  
29  
30  
31  
32  
33  
34  
35  
36  
37  
38  
39  
40  
41  
42  
43  
44  
45  
46  
47

### Selected characteristics of the peer-reviewed academic literature in the scoping review of environmental scans

| <i>Authors/ Year</i>            | <i>Country</i> | <i>Aim/Purpose of the Study</i>                                                                                                                                                                                                                                                  | <i>Data Collection</i> | <i>Healthcare Setting(s)</i>           |
|---------------------------------|----------------|----------------------------------------------------------------------------------------------------------------------------------------------------------------------------------------------------------------------------------------------------------------------------------|------------------------|----------------------------------------|
| O'Mahony & Clark (2018) (121)   | CA             | To increase understanding of immigrant women's reproductive mental health care services within rural settings and to inform the implementation of a cross regional research program.                                                                                             | Mixed methods          | Multiple                               |
| Ocampo et al. (2017) (122)      | CA             | To understand the current practices and perceptions with respect to ward closure for hospital acquired infectious disease outbreaks in acute care hospital settings across Canada.                                                                                               | Mixed methods          | Acute care                             |
| Patel et al. (2014) (123)       | CA             | To characterize anal cancer screening practices in jurisdictions around the world with the aims of providing clinical and operational guidance for clinicians, describing the current practice and providing information from other jurisdictions for health care policy makers. | Quantitative           | Not clear or not specifically reported |
| Porterfield et al. (2012) (124) | US             | To develop a framework for interventions that utilize linkages between clinical practices and community organizations for the delivery of preventive services, and to identify and characterize these efforts.                                                                   | Qualitative            | Multiple                               |

### Selected characteristics of the peer-reviewed academic literature in the scoping review of environmental scans

| <i>Authors/ Year</i>                | <i>Country</i> | <i>Aim/Purpose of the Study</i>                                                                                                                               | <i>Data Collection</i> | <i>Healthcare Setting(s)</i> |
|-------------------------------------|----------------|---------------------------------------------------------------------------------------------------------------------------------------------------------------|------------------------|------------------------------|
| Poulin et al. (2014) (125)          | CA             | To determine the current preoperative skin antisepsis in Alberta, reviewed key publications and existing guidelines,                                          | Mixed methods          | Acute care                   |
| Reitmanova & Gustafson (2009) (126) | CA             | To identify the range of existing mental health care services in St. John's, NL with particular attention to those targeting visible minority immigrants.     | Qualitative            | Multiple                     |
| Richard et al. (2016) (127)         | AU             | To identify, implement and trial best practice interventions to improve access to PHC for vulnerable populations.                                             | Mixed methods          | Primary health care          |
| Rosa Fortin et al. (2014) (128)     | CA             | To identify programs for managing obesity in adults and evaluate the degree to which programs adhere to recommendations                                       | Quantitative           | Multiple                     |
| Rowel et al. (2005) (51)            | US             | To conduct the needs-assessment phase of a project to increase cancer screening among African Americans in Baltimore, MD.                                     | Mixed methods          | Multiple                     |
| Scime & Burke (2018) (129)          | CA             | To determine, via key informant interviews, the types and frequencies of postnatal breastfeeding resources available to mothers of infants in Canadian NICUs. | Qualitative            | Acute care                   |

**Selected characteristics of the peer-reviewed academic literature in the scoping review of environmental scans**

| <i>Authors/ Year</i>           | <i>Country</i> | <i>Aim/Purpose of the Study</i>                                                                                                                                                                                     | <i>Data Collection</i> | <i>Healthcare Setting(s)</i> |
|--------------------------------|----------------|---------------------------------------------------------------------------------------------------------------------------------------------------------------------------------------------------------------------|------------------------|------------------------------|
| Shahid et al. (2008) (77)      | AU             | To map activities in service provision in Indigenous cancer control with a view to sharing lessons learned.                                                                                                         | Qualitative            | Multiple                     |
| Silva et al. (2012) (130)      | US             | To conduct an ES of telemedicine-based stroke programs in the US and to identify success factors and barriers to the development or sustainability of telestroke programs                                           | Mixed methods          | Multiple                     |
| Tark et al. (2019) (131)       | US             | To identify state variations in Physician Orders for Life-Sustaining Treatment forms and determine if variations are associated with program maturity status.                                                       | Quantitative           | Multiple                     |
| Vandenberg et al. (2009) (132) | CA             | To provide a practical framework to guide standardized delivery of evidence-based systemic treatment in hospitals outside regional cancer centres, with special consideration for geographically dispersed regions. | Qualitative            | Ambulatory care              |
| Whitton et al. (2009) (133)    | CA             | To develop the organisational standards for the delivery of intensity-modulated radiation therapy.                                                                                                                  | Qualitative            | Acute care                   |



1  
2  
3  
4  
5  
6  
7  
8  
9  
10  
11  
12  
13  
14  
15  
16  
17  
18  
19  
20  
21  
22  
23  
24  
25  
26  
27  
28  
29  
30  
31  
32  
33  
34  
35  
36  
37  
38  
39  
40  
41  
42  
43  
44  
45  
46  
47

**Selected characteristics of the peer-reviewed academic literature in the scoping review of environmental scans**

| <i>Authors/ Year</i>             | <i>Country</i> | <i>Aim/Purpose of the Study</i>                                                                                                                                                                                            | <i>Data Collection</i> | <i>Healthcare Setting(s)</i> |
|----------------------------------|----------------|----------------------------------------------------------------------------------------------------------------------------------------------------------------------------------------------------------------------------|------------------------|------------------------------|
| Wijeysundera et al. (2012) (134) | CA             | To understand the current availability, intensity, and complexity of services offered in specialized heart failure clinics in Ontario.                                                                                     | Mixed Methods          | Ambulatory care              |
| Wittal (2018) (135)              | CA             | To gain a broader understanding of survivorship care, highlight any trends, and report disparities in care during the transition from the oncology to the community setting.                                               | Qualitative            | Multiple                     |
| Wittich et al. (2018) (136)      | CA             | To identify screening tools, technologies and strategies vision and hearing care specialists recommend to front-line healthcare professionals for the screening of older adults in long-term care homes who have dementia. | Qualitative            | Multiple                     |
| Wolff et al. (2018) (137)        | US             | To determine the availability of information about and features of shared access functionality to the patient portal.                                                                                                      | Qualitative            | Multiple                     |
| Wurz et al. (2019) (138)         | CA             | To identify physical activity programs for children diagnosed with cancer and summarize program characteristics.                                                                                                           | Qualitative            | Multiple                     |

**Selected characteristics of the peer-reviewed academic literature in the scoping review of environmental scans**

| <i>Authors/ Year</i>           | <i>Country</i> | <i>Aim/Purpose of the Study</i>                                                                                                    | <i>Data Collection</i> | <i>Healthcare Setting(s)</i> |
|--------------------------------|----------------|------------------------------------------------------------------------------------------------------------------------------------|------------------------|------------------------------|
| Yergens et al.<br>(2014) (139) | CA             | To better understand the status of medical assessment units in Canada and examine the adoption and characteristics of these units. | Quantitative           | Acute care                   |

For peer review only

1  
2  
3  
4 **Supplementary file 3**

5  
6 **Characteristics of the grey literature studies in the scoping review of environmental scans.**

7

| 8 <b>Authors/ Year</b>                                                            | 9 <b>Country</b> | 10 <b>Aim/Purpose of the Study</b>                                                                                                                                                                                                                    | 11 <b>Data Collection</b> | 12 <b>Healthcare Setting(s)</b>                 |
|-----------------------------------------------------------------------------------|------------------|-------------------------------------------------------------------------------------------------------------------------------------------------------------------------------------------------------------------------------------------------------|---------------------------|-------------------------------------------------|
| 13 Archer et al.<br>14 (2010) (140)                                               | 15 CA            | 16 To describe the design, functionality,<br>17 implementations, applications, outcomes, and<br>18 the perceived and real benefits of ePersonal<br>19 Health Records that have been used thus far,<br>20 with a particular emphasis on North America. | 21 Qualitative            | 22 Not clear or not<br>23 specifically reported |
| 24 Association of<br>25 Maternal & Child<br>26 Health Programs<br>27 (2011) (141) | 28 US            | 29 To provide insight into approaches that state<br>30 Title V programs are taking to address the<br>31 growing incidence of autism spectrum disorder<br>32 and other developmental disabilities (ASD/DD)                                             | 33 Qualitative            | 34 Multiple                                     |
| 35 Bandali (2014)<br>36 (142)                                                     | 37 CA            | 38 To understand current breastfeeding services<br>39 within Alberta Health Services acute care and<br>40 community facilities.                                                                                                                       | 41 Mixed<br>42 methods    | 43 Multiple                                     |
| 44 Bella et al. (2005)<br>45 (143)                                                | 46 US            | 47 To promote the development of new models<br>of care for consumers with multiple chronic<br>conditions who are served by Medicaid or are<br>dually eligible for Medicaid and Medicare.                                                              | Mixed<br>methods          | Multiple                                        |
| Blackman (2018)<br>(144)                                                          | CA               | To compile inventor of existing Chronic<br>Disease and Injury Prevention (CDIP)<br>programming that is culturally appropriate to<br>the indigenous population.                                                                                        | Qualitative               | Primary health care                             |

**Characteristics of the grey literature studies in the scoping review of environmental scans.**

| <b>Authors/ Year</b>                            | <b>Country</b> | <b>Aim/Purpose of the Study</b>                                                                                                                                                                                     | <b>Data Collection</b> | <b>Healthcare Setting(s)</b> |
|-------------------------------------------------|----------------|---------------------------------------------------------------------------------------------------------------------------------------------------------------------------------------------------------------------|------------------------|------------------------------|
| Boonyasai et al. (2014) (145)                   | US             | To conduct an environmental scan of the literature on Emergency Department (ED) discharge procedures to describe existing processes, along with their strengths, weaknesses, omissions, barriers, and facilitators. | Qualitative            | Acute care                   |
| Campos & Manning (2006) (146)                   | CA             | To identify service priorities in Brandon and Winnipeg for immigrants and refugees infected with, affected by, or at risk for HIV.                                                                                  | Qualitative            | Multiple                     |
| Cowling & Dolcine (2017) (147)                  | CA             | To identify and analyze evidence and information regarding how Point of Care Testing (POCT) is implemented and managed in jurisdictions across Canada                                                               | Mixed methods          | Multiple                     |
| Deshpande, Khola, Lorca et al. (2008a) 148)     | CA             | To provide a critical evaluation of the available data on the use of clinical applications of asynchronous telehealth.                                                                                              | Qualitative            | Multiple                     |
| Deshpande, Khola, Mckibbon et al. (2008b) (149) | CA             | To provide a critical evaluation of the available data on the use of telehealth for acute stroke patients                                                                                                           | Qualitative            | Multiple                     |

**Characteristics of the grey literature studies in the scoping review of environmental scans.**

| <b>Authors/ Year</b>                                 | <b>Country</b> | <b>Aim/Purpose of the Study</b>                                                                                                                                                                                                  | <b>Data Collection</b> | <b>Healthcare Setting(s)</b>           |
|------------------------------------------------------|----------------|----------------------------------------------------------------------------------------------------------------------------------------------------------------------------------------------------------------------------------|------------------------|----------------------------------------|
| Dietitians of Canada (2018) (150)                    | CA             | To describe the current dietetic workforce and the role of dietitians as interprofessional health team members in Canadian provinces and territories.                                                                            | Qualitative            | Primary health care                    |
| Forsberg et al. (2014) (151)                         | US             | To summarize current preventive service utilization patterns and barriers, documented cost and health outcomes associated with prevention, and activities and efforts designed to improve preventive service rates and outcomes. | Qualitative            | Not clear or not specifically reported |
| Garland (2015) (152)                                 | CA             | To identify and summarize information about independent ambulatory cancer care centres in Canada, including services and interventions provided to cancer patients outside traditional acute care settings.                      | Mixed methods          | Ambulatory care                        |
| Great Plains Quality Innovation Network (2016) (153) | US             | To collect information regarding current status of medication safety efforts to detect and prevent Adverse Drug Events (ADE) within the Great Plains Quality Innovation Network (QIN).                                           | Quantitative           | Multiple                               |

**Characteristics of the grey literature studies in the scoping review of environmental scans.**

| <b>Authors/ Year</b>               | <b>Country</b> | <b>Aim/Purpose of the Study</b>                                                                                                                                                                                                                                        | <b>Data Collection</b> | <b>Healthcare Setting(s)</b> |
|------------------------------------|----------------|------------------------------------------------------------------------------------------------------------------------------------------------------------------------------------------------------------------------------------------------------------------------|------------------------|------------------------------|
| Health Tech Solutions (2018) (154) | US             | To develop an accurate “As-Is” understanding of the Health Information Technology (HIT) landscape within the State of Alaska.                                                                                                                                          | Mixed Methods          | Multiple                     |
| Hochman et al. (2017) (155)        | US             | To examine what is currently known about reducing readmissions from the primary care perspective by analyzing the findings of 42 peer-reviewed articles and 30 items from the gray literature.                                                                         | Qualitative            | Primary care                 |
| Loorand-Stiver (2012a) (156)       | CA             | To provide an overview of existing falls prevention strategies targeting adults (18 years and older) in outpatient or community-based mental health and/or addiction programs in Canada.                                                                               | Qualitative            | Multiple                     |
| Loorand-Stiver (2012b) (157)       | CA             | To gather information from long-term ventilation (LTV) programs in British Columbia, Alberta, Manitoba, Ontario, and Newfoundland and Labrador regarding the transitioning of medically stable LTVD patients out of critical care units into alternate levels of care. | Qualitative            | Acute care                   |

**Characteristics of the grey literature studies in the scoping review of environmental scans.**

| <b>Authors/ Year</b>                                  | <b>Country</b> | <b>Aim/Purpose of the Study</b>                                                                                                                                                                                                                                                                                                                                                                                               | <b>Data Collection</b> | <b>Healthcare Setting(s)</b> |
|-------------------------------------------------------|----------------|-------------------------------------------------------------------------------------------------------------------------------------------------------------------------------------------------------------------------------------------------------------------------------------------------------------------------------------------------------------------------------------------------------------------------------|------------------------|------------------------------|
| Mason & Ford (2017) (158)                             | CA             | To Identify and summarize information regarding the feeding and swallowing assessment services provided to pediatric populations in Canada.                                                                                                                                                                                                                                                                                   | Mixed methods          | Multiple                     |
| McGrath et al. (2017) (159)                           | CA             | To explore how e-mental health is integrated within health systems and/or health policy nationwide.                                                                                                                                                                                                                                                                                                                           | Qualitative            | Multiple                     |
| MedStar Health Research Institute et al. (2017) (170) | US             | To identify: 1) studies on methods to engage patients and families in their care in primary care settings and the impact of these methods on patient safety; 2) existing interventions and associated tools to improve safety; 3) gaps between existing tools and those that need to be developed; 4) examples of primary care practices that have engaged patients and families in care with improvements in patient safety. | Mixed methods          | Multiple                     |
| Moran et al. (2017) (160)                             | US             | To review on implementation of medication-assisted treatment (MAT) for opioid use disorder (OUD) in rural primary care settings.                                                                                                                                                                                                                                                                                              | Qualitative            | Primary care                 |

**Characteristics of the grey literature studies in the scoping review of environmental scans.**

| <b>Authors/ Year</b>           | <b>Country</b> | <b>Aim/Purpose of the Study</b>                                                                                                                                           | <b>Data Collection</b> | <b>Healthcare Setting(s)</b>           |
|--------------------------------|----------------|---------------------------------------------------------------------------------------------------------------------------------------------------------------------------|------------------------|----------------------------------------|
| Morrison (2009) (161)          | CA             | To provide information regarding the seasonal and H1N1 vaccination programs currently offered in Canadian jurisdictions.                                                  | Qualitative            | Not clear or not specifically reported |
| Morrison & Dowler (2011) (162) | CA             | To provide a general overview of newborn screening in Canada, including resources used and the retention period for samples.                                              | Qualitative            | Multiple                               |
| Murzin & Furlotte (2013) (163) | CA             | To outline the results of a national survey of programs and services which address the needs of older people living with HIV (PLWHIV) in Canada.                          | Mixed methods          | Multiple                               |
| Ndegwa (2010) (164)            | CA             | To provide information regarding support services provided by cardiac rehabilitation programs across Canada.                                                              | Qualitative            | Rehabilitation                         |
| Ndegwa (2011) (165)            | CA             | To provide a general overview of regional health authority and other local level frameworks, initiatives, programs, and/or strategies developed to support healthy aging. | Qualitative            | Multiple                               |



**Characteristics of the grey literature studies in the scoping review of environmental scans.**

| <b>Authors/ Year</b>         | <b>Country</b> | <b>Aim/Purpose of the Study</b>                                                                                                                                                                                                                                                                            | <b>Data Collection</b> | <b>Healthcare Setting(s)</b> |
|------------------------------|----------------|------------------------------------------------------------------------------------------------------------------------------------------------------------------------------------------------------------------------------------------------------------------------------------------------------------|------------------------|------------------------------|
| Ndegwa et al. (2018) (166)   | CA             | To provide information about available services, factors affecting access, and funding practices related to nonpharmacological therapies for chronic non-cancer pain in Canada.                                                                                                                            | Mixed methods          | Multiple                     |
| Paccagnan et al (2017) (167) | CA             | To inform further development and population of the Bone and Joint Health Strategic Clinical Network (BJNSCN) Model of Care for Osteoarthritis Management (OA Model) by identifying programs and education tools in Alberta, Canada, and internationally for the management of hip and/or knee OA symptoms | Mixed methods          | Multiple                     |
| Seal et al. (2018) (168)     | CA             | To gather jurisdictional perspectives on ankyloglossia diagnosis and treatment in Canada.                                                                                                                                                                                                                  | Mixed methods          | Multiple                     |
| Smith (2001) (169)           | CA             | To examine resources and policies relating to access and equity in all Health Units and Community Health Centers in Ontario                                                                                                                                                                                | Quantitative           | Primary health care          |
| Topfer & Spry (2019) (171)   | CA             | To understand current resources and practices for sepsis detection in rural and remote settings.                                                                                                                                                                                                           | Mixed methods          | Multiple                     |

**Characteristics of the grey literature studies in the scoping review of environmental scans.**

| <b>Authors/ Year</b>         | <b>Country</b> | <b>Aim/Purpose of the Study</b>                                                                                                                                                                                                                                                                                                                                                                  | <b>Data Collection</b> | <b>Healthcare Setting(s)</b> |
|------------------------------|----------------|--------------------------------------------------------------------------------------------------------------------------------------------------------------------------------------------------------------------------------------------------------------------------------------------------------------------------------------------------------------------------------------------------|------------------------|------------------------------|
| Tran et al. (2008)<br>(172)  | CA             | To evaluate the clinical benefit and to review the cost effectiveness of home telehealth versus usual care or no care for the management of diabetes, heart failure, and chronic obstructive pulmonary disease (COPD).                                                                                                                                                                           | Qualitative            | Multiple                     |
| Wells et al. (2019)<br>(173) | CA             | To gain direct stakeholder perspectives on the current context surrounding opioid addiction programs (including both opioid OADs and other non-pharmacological programming) and care setting transitions.                                                                                                                                                                                        | Mixed methods          | Multiple                     |
| Young et al.<br>(2018) (174) | CA             | To identify existing or developing internet-delivered Cognitive Behaviour Therapy (iCBT) programs for treating patients with major depressive disorder (MDD) and anxiety disorders, to describe the relevant facilitators and barriers to implementation of these programs, and to explore the range of strategies that have been used to establish iCBT programs across Canadian jurisdictions. | Mixed methods          | Multiple                     |

1  
2  
3  
4  
5  
6  
7  
8  
9  
10  
11  
12  
13  
14  
15  
16  
17  
18  
19  
20  
21  
22  
23  
24  
25  
26  
27  
28  
29  
30  
31  
32  
33  
34  
35  
36  
37  
38  
39  
40  
41  
42  
43  
44  
45  
46  
47

**Characteristics of the grey literature studies in the scoping review of environmental scans.**

| <b>Authors/ Year</b>         | <b>Country</b> | <b>Aim/Purpose of the Study</b>                                                                                                            | <b>Data Collection</b> | <b>Healthcare Setting(s)</b> |
|------------------------------|----------------|--------------------------------------------------------------------------------------------------------------------------------------------|------------------------|------------------------------|
| Yurick & Allatt (2016) (175) | CA             | To understand current state, functions, and components of comprehensive cancer-related supportive care in Canada, USA, UK, and New Zealand | Mixed methods          | Multiple                     |

For peer review only

## Supplementary file 4

## Environmental scan methods, data sources, and scanning mode characteristics studies from the peer-reviewed academic databases\*

| Authors/<br>Year                     | Data Collection Methods |        |                          |             |                        |       | Data Sources     |                          |                          |                   |                     |       | Data Source Mode  |                     |                   |                     | Scanning Mode                                 |                                    |
|--------------------------------------|-------------------------|--------|--------------------------|-------------|------------------------|-------|------------------|--------------------------|--------------------------|-------------------|---------------------|-------|-------------------|---------------------|-------------------|---------------------|-----------------------------------------------|------------------------------------|
|                                      | Literature review       | Survey | Key informant interviews | Focus group | Other personal contact | Other | Personal sources | Administrative databases | Reports or internal docs | Academic database | Internet web search | Other | Internal personal | Internal impersonal | External personal | External impersonal | Conditioned viewing - Passive data collection | Searching - Active data collection |
| Abrahamyan et al. 2015 (83)          |                         | X      |                          |             | X                      | X     | X                |                          |                          |                   |                     | X     |                   |                     |                   |                     |                                               | X                                  |
| Ahmad 2015 (84)                      |                         |        | X                        |             |                        |       | X                |                          |                          |                   |                     | X     |                   |                     |                   |                     |                                               | X                                  |
| Baezconde-Garbanati et al. 2017 (85) | X                       |        | X                        |             | X                      |       | X                |                          | X                        |                   |                     | X     |                   | X                   | X                 | X                   | X                                             | X                                  |
| Bak et al. 2013 (86)                 | X                       |        |                          |             |                        |       |                  |                          |                          | X                 |                     |       |                   |                     | X                 | X                   |                                               |                                    |
| Bakhru et al. 2015 (87)              |                         | X      |                          |             |                        |       | X                |                          |                          |                   |                     |       |                   | X                   |                   |                     |                                               | X                                  |
| Ball et al. 2011 (88)                |                         | X      |                          |             | X                      | X     | X                |                          |                          |                   |                     |       |                   | X                   |                   |                     |                                               | X                                  |

| Authors/<br>Year          | Data Collection Methods |        |                          |             |                        |       | Data Sources     |                          |                          |                   |                     |       | Data Source Mode  |                     |                   |                     | Scanning Mode                                 |                                    |
|---------------------------|-------------------------|--------|--------------------------|-------------|------------------------|-------|------------------|--------------------------|--------------------------|-------------------|---------------------|-------|-------------------|---------------------|-------------------|---------------------|-----------------------------------------------|------------------------------------|
|                           | Literature review       | Survey | Key informant interviews | Focus group | Other personal contact | Other | Personal sources | Administrative databases | Reports or internal docs | Academic database | Internet web search | Other | Internal personal | Internal impersonal | External personal | External impersonal | Conditioned viewing - Passive data collection | Searching - Active data collection |
| Battye et al. 2003 (89)   |                         |        | X                        | X           | X                      | X     | X                | X                        | X                        |                   |                     | X     | X                 | X                   | X                 |                     | X                                             | X                                  |
| Bednar et al. 2018 (90)   | X                       | X      | X                        |             | X                      |       | X                |                          | X                        | X                 | X                   | X     | X                 | X                   | X                 | X                   | X                                             | X                                  |
| Brouwers et al. 2009 (91) | X                       |        | X                        |             |                        |       | X                |                          |                          | X                 |                     | X     |                   | X                   | X                 | X                   | X                                             | X                                  |
| Carter et al. 2017 (92)   |                         | X      |                          |             |                        |       | X                |                          |                          |                   |                     |       |                   | X                   |                   |                     |                                               | X                                  |
| Cartmell et al. 2018 (93) |                         | X      | X                        |             | X                      |       | X                |                          |                          |                   |                     | X     |                   | X                   |                   |                     |                                               | X                                  |
| Chang et al. 2017 (94)    |                         | X      | X                        |             |                        |       | X                |                          |                          |                   |                     | X     |                   | X                   |                   |                     |                                               | X                                  |
| Davies et al. 2008 (95)   |                         |        | X                        |             |                        | X     | X                |                          | X                        |                   |                     | X     | X                 |                     |                   |                     |                                               | X                                  |
| DeGroff et al. 2014 (96)  | X                       |        | X                        |             |                        |       | X                |                          | X                        | X                 | X                   |       |                   | X                   | X                 | X                   | X                                             | X                                  |
| Delparte et al. 2014 (97) | X                       |        |                          |             |                        |       |                  |                          | X                        | X                 | X                   |       | X                 |                     | X                 | X                   | X                                             |                                    |

| Authors/<br>Year              | Data Collection Methods |        |                          |             |                        |       | Data Sources     |                          |                          |                   |                     |       | Data Source Mode  |                     |                   |                     | Scanning<br>Mode                              |                                    |
|-------------------------------|-------------------------|--------|--------------------------|-------------|------------------------|-------|------------------|--------------------------|--------------------------|-------------------|---------------------|-------|-------------------|---------------------|-------------------|---------------------|-----------------------------------------------|------------------------------------|
|                               | Literature review       | Survey | Key informant interviews | Focus group | Other personal contact | Other | Personal sources | Administrative databases | Reports or internal docs | Academic database | Internet web search | Other | Internal personal | Internal impersonal | External personal | External impersonal | Conditioned viewing - Passive data collection | Searching - Active data collection |
| Finnigan-Fox et al. 2017 (98) | X                       |        | X                        |             |                        |       | X                |                          | X                        | X                 |                     | X     |                   | X                   | X                 | X                   | X                                             |                                    |
| Fong et al. 2018 (99)         | X                       |        |                          |             |                        | X     |                  |                          |                          |                   | X                   |       | X                 |                     |                   | X                   | X                                             |                                    |
| Frost et al. 2016 (100)       | X                       |        |                          |             |                        |       |                  |                          | X                        | X                 |                     |       |                   |                     | X                 | X                   |                                               |                                    |
| Glurich et al. 2017 (101)     | X                       |        |                          |             |                        |       |                  | X                        | X                        | X                 | X                   |       |                   |                     | X                 | X                   |                                               |                                    |
| Goldwater et al. 2014 (102)   | X                       |        | X                        |             |                        | X     | X                | X                        | X                        | X                 | X                   |       |                   | X                   | X                 | X                   | X                                             |                                    |
| Gustafson et al. 2008 (103)   | **<br>NSI<br>-          | -      | -                        | -           | -                      | -     | -                | -                        | -                        | -                 | -                   | -     | -                 | -                   | -                 | -                   | -                                             |                                    |
| Hauck et al. 2008 (104)       | -<br>NSI                | -      | -                        | -           | -                      | -     | -                | -                        | -                        | -                 | -                   | -     | -                 | -                   | -                 | -                   | -                                             |                                    |
| Hogan et al. 2014 (105)       | X                       |        |                          |             |                        |       |                  |                          | X                        | X                 |                     |       |                   |                     | X                 | X                   |                                               |                                    |

| Authors/<br>Year                     | Data Collection Methods |        |                          |             |                        |       | Data Sources     |                          |                          |                   |                     |       | Data Source Mode  |                     |                   |                     | Scanning Mode                                 |                                    |
|--------------------------------------|-------------------------|--------|--------------------------|-------------|------------------------|-------|------------------|--------------------------|--------------------------|-------------------|---------------------|-------|-------------------|---------------------|-------------------|---------------------|-----------------------------------------------|------------------------------------|
|                                      | Literature review       | Survey | Key informant interviews | Focus group | Other personal contact | Other | Personal sources | Administrative databases | Reports or internal docs | Academic database | Internet web search | Other | Internal personal | Internal impersonal | External personal | External impersonal | Conditioned viewing - Passive data collection | Searching - Active data collection |
| Hogenbirk et al. 2006 (106)          | X                       | X      | X                        |             |                        |       | X                |                          |                          | X                 |                     |       |                   |                     | X                 | X                   | X                                             | X                                  |
| Jeon et al. 2012 (107)               | X                       |        |                          |             |                        |       |                  |                          |                          | X                 |                     |       |                   |                     |                   | X                   | X                                             |                                    |
| Joschko et al. 2018 (108)            | X                       |        | X                        |             |                        |       | X                |                          |                          | X                 | X                   |       |                   |                     | X                 | X                   | X                                             | X                                  |
| Kobe et al. 2019 (109)               | X                       |        |                          |             |                        |       |                  |                          |                          | X                 | X                   |       |                   |                     |                   | X                   | X                                             |                                    |
| Leiva Portocarrero et al. 2015 (110) | X                       |        | X                        |             |                        | X     | X                |                          |                          | X                 | X                   |       |                   |                     | X                 | X                   | X                                             | X                                  |
| Liddy et al. 2015 (111)              | X                       |        | X                        |             |                        |       | X                |                          |                          | X                 | X                   |       |                   |                     | X                 | X                   | X                                             | X                                  |
| Liddy & Mill, 2014 (112)             | X                       |        | X                        |             |                        |       | X                |                          |                          | X                 |                     |       |                   |                     | X                 | X                   | X                                             | X                                  |
| Luke et al. 2018 (113)               | X                       |        | X                        |             |                        |       | X                |                          |                          | X                 | X                   |       |                   |                     | X                 | X                   | X                                             | X                                  |

| Authors/<br>Year             | Data Collection Methods |        |                          |             |                        |       | Data Sources     |                          |                          |                   |                     |       | Data Source Mode  |                     |                   |                     | Scanning<br>Mode                              |                                    |
|------------------------------|-------------------------|--------|--------------------------|-------------|------------------------|-------|------------------|--------------------------|--------------------------|-------------------|---------------------|-------|-------------------|---------------------|-------------------|---------------------|-----------------------------------------------|------------------------------------|
|                              | Literature review       | Survey | Key informant interviews | Focus group | Other personal contact | Other | Personal sources | Administrative databases | Reports or internal docs | Academic database | Internet web search | Other | Internal personal | Internal impersonal | External personal | External impersonal | Conditioned viewing - Passive data collection | Searching - Active data collection |
| Mansell et al. 2017 (114)    | X                       |        | X                        |             |                        |       | X                |                          |                          | X                 |                     |       |                   | X                   | X                 | X                   | X                                             |                                    |
| McDonald & Aciri, 2018 (115) | X                       | X      |                          |             |                        |       | X                |                          |                          | X                 |                     |       |                   | X                   | X                 | X                   | X                                             |                                    |
| Mew et al. 2017 (116)        | X                       |        | X                        |             | X                      |       | X                |                          | X                        | X                 | X                   | X     | X                 | X                   | X                 | X                   | X                                             |                                    |
| Mitchell et al. 2017 (117)   | X                       |        |                          |             | X                      | X     | X                |                          | X                        | X                 | X                   | X     |                   | X                   | X                 | X                   |                                               |                                    |
| Moore et al. 2015 (118)      |                         |        | X                        |             |                        |       | X                |                          |                          |                   |                     | X     |                   |                     |                   |                     | X                                             |                                    |
| Morton et al. 2010 (119)     | X                       |        |                          |             |                        |       |                  |                          |                          | X                 |                     |       |                   |                     | X                 | X                   |                                               |                                    |
| Munce et al. 2010 (120)      | X                       |        |                          |             |                        |       |                  |                          | X                        | X                 |                     |       |                   |                     | X                 | X                   |                                               |                                    |
| Naumann et al. 2013 (56)     | X                       |        | X                        |             | X                      | X     | X                |                          | X                        | X                 | X                   | X     | X                 | X                   | X                 | X                   | X                                             |                                    |



| Authors/<br>Year                  | Data Collection Methods |        |                          |             |                        |       | Data Sources     |                          |                          |                   |                     | Data Source Mode |                   |                     |                   | Scanning Mode       |                                               |                                    |
|-----------------------------------|-------------------------|--------|--------------------------|-------------|------------------------|-------|------------------|--------------------------|--------------------------|-------------------|---------------------|------------------|-------------------|---------------------|-------------------|---------------------|-----------------------------------------------|------------------------------------|
|                                   | Literature review       | Survey | Key informant interviews | Focus group | Other personal contact | Other | Personal sources | Administrative databases | Reports or internal docs | Academic database | Internet web search | Other            | Internal personal | Internal impersonal | External personal | External impersonal | Conditioned viewing - Passive data collection | Searching - Active data collection |
| Ocampo et al. 2017 (122)          |                         | X      |                          |             |                        |       | X                |                          |                          |                   |                     |                  |                   |                     | X                 |                     |                                               | X                                  |
| O'Mahony & Clark, 2018 (121)      | X                       | X      | X                        |             |                        |       | X                |                          |                          | X                 |                     | X                | X                 |                     | X                 |                     | X                                             | X                                  |
| Patel et al. 2014 (123)           |                         | X      |                          |             |                        |       | X                |                          |                          |                   |                     |                  |                   |                     | X                 |                     |                                               | X                                  |
| Porterfield et al. 2012 (124)     | X                       |        |                          |             |                        |       |                  |                          |                          | X                 |                     |                  |                   |                     |                   | X                   | X                                             |                                    |
| Poulin et al. 2014 (125)          |                         | X      |                          |             |                        |       | X                |                          |                          |                   |                     | X                |                   |                     |                   |                     |                                               | X                                  |
| Reitmanova & Gustafson 2009 (126) | X                       |        |                          |             |                        |       |                  |                          |                          | X                 | X                   |                  | X                 |                     | X                 |                     | X                                             |                                    |
| Richard et al. 2016 (127)         |                         | X      |                          |             |                        |       | X                |                          |                          |                   |                     |                  |                   |                     | X                 |                     |                                               | X                                  |
| Rosa Fortin et al. 2014 (128)     |                         | X      |                          |             | X                      |       | X                |                          |                          |                   |                     |                  |                   |                     | X                 |                     |                                               | X                                  |

| Authors/<br>Year               | Data Collection Methods |        |                          |             |                        |       | Data Sources     |                          |                          |                   |                     |       | Data Source Mode  |                     |                   |                     | Scanning<br>Mode                              |                                    |
|--------------------------------|-------------------------|--------|--------------------------|-------------|------------------------|-------|------------------|--------------------------|--------------------------|-------------------|---------------------|-------|-------------------|---------------------|-------------------|---------------------|-----------------------------------------------|------------------------------------|
|                                | Literature review       | Survey | Key informant interviews | Focus group | Other personal contact | Other | Personal sources | Administrative databases | Reports or internal docs | Academic database | Internet web search | Other | Internal personal | Internal impersonal | External personal | External impersonal | Conditioned viewing - Passive data collection | Searching - Active data collection |
| Rowel et al. 2008 (51)         | X                       |        | X                        | X           | X                      | X     | X                | X                        |                          | X                 | X                   | X     | X                 | X                   | X                 | X                   | X                                             | X                                  |
| Scime & Burke 2018 (129)       |                         |        | X                        |             |                        |       | X                |                          |                          |                   |                     |       |                   |                     | X                 |                     |                                               | X                                  |
| Shahid et al. 2008 (77)        |                         |        | X                        |             | X                      |       | X                |                          |                          |                   |                     | X     |                   |                     |                   |                     |                                               | X                                  |
| Silva et al. 2012 (130)        | X                       | X      | X                        |             | X                      |       | X                |                          |                          | X                 | X                   |       |                   | X                   | X                 | X                   | X                                             | X                                  |
| Tark et al. 2019 (131)         | X                       |        |                          |             |                        |       |                  |                          |                          | X                 |                     |       |                   |                     | X                 |                     | X                                             |                                    |
| Vandenberg et al. 2009 (132)   | X                       |        |                          |             |                        |       |                  |                          |                          | X                 |                     |       | X                 |                     | X                 |                     | X                                             |                                    |
| Whitton e al. 2009 (133)       | X                       |        |                          |             |                        |       |                  |                          | X                        | X                 |                     |       | X                 |                     | X                 |                     | X                                             |                                    |
| Wijeysundera et al. 2012 (134) |                         |        | X                        |             |                        |       | X                |                          |                          |                   |                     | X     |                   |                     |                   |                     |                                               | X                                  |

1  
2  
3  
4  
5  
6  
7  
8  
9  
10  
11  
12  
13  
14  
15  
16  
17  
18  
19  
20  
21  
22  
23  
24  
25  
26  
27  
28  
29  
30  
31  
32  
33  
34  
35  
36  
37  
38  
39  
40  
41  
42  
43  
44  
45  
46  
47

| <b>Authors/<br/>Year</b>  | <b>Methods</b>    |        |                          |             |                        |       | <b>Data Sources</b> |                          |                          |                   |                     |       | <b>Data Source Mode</b> |                     |                   |                     | <b>Scanning Mode</b>                          |                                    |
|---------------------------|-------------------|--------|--------------------------|-------------|------------------------|-------|---------------------|--------------------------|--------------------------|-------------------|---------------------|-------|-------------------------|---------------------|-------------------|---------------------|-----------------------------------------------|------------------------------------|
|                           | Literature review | Survey | Key informant interviews | Focus group | Other personal contact | Other | Personal sources    | Administrative databases | Reports or internal docs | Academic database | Internet web search | Other | Internal personal       | Internal impersonal | External personal | External impersonal | Conditioned viewing - Passive data collection | Searching - Active data collection |
| Wittal 2018 (135)         | X                 |        | X                        |             |                        |       | X                   | X                        | X                        | X                 | X                   | X     | X                       | X                   | X                 | X                   | X                                             | X                                  |
| Wittich et al. 2018 (136) |                   |        | X                        |             |                        |       | X                   |                          |                          |                   |                     |       |                         | X                   |                   |                     |                                               | X                                  |
| Wolff et al. 2018 (137)   | X                 |        |                          |             |                        |       |                     |                          |                          | X                 |                     |       |                         |                     | X                 | X                   |                                               |                                    |
| Wurz et al. 2019 (138)    | X                 |        | X                        |             | X                      |       | X                   |                          | X                        | X                 |                     | X     |                         | X                   | X                 | X                   | X                                             | X                                  |
| Yergens et al. 2014 (139) |                   | X      |                          |             |                        |       | X                   |                          |                          |                   |                     | X     |                         | X                   |                   |                     |                                               | X                                  |

\* The data collection methods, data sources, data source mode, and scanning mode refer only to the environmental scanning component of the study. \*\* NSI=Not clear or not specifically reported

## Supplementary file 5

## Environmental scan methods, data sources, and scanning mode characteristics studies from grey literature\*

| Authors/<br>Year                                                     | Data Collection Methods |        |                          |             |                        | Data Sources |                  |                          |                          |                   |                     | Data Source Mode |                   |                     |                   | Scanning Mode       |                                               |                                    |
|----------------------------------------------------------------------|-------------------------|--------|--------------------------|-------------|------------------------|--------------|------------------|--------------------------|--------------------------|-------------------|---------------------|------------------|-------------------|---------------------|-------------------|---------------------|-----------------------------------------------|------------------------------------|
|                                                                      | Literature review       | Survey | Key informant interviews | Focus group | Other personal contact | Other        | Personal sources | Administrative databases | Reports or internal docs | Academic database | Internet web search | Other            | Internal personal | Internal impersonal | External personal | External impersonal | Conditioned viewing - Passive data collection | Searching - Active data collection |
| Archer et al. 2010 (140)                                             | X                       |        |                          |             |                        |              |                  |                          | X                        |                   |                     |                  |                   |                     | X                 | X                   |                                               |                                    |
| Association of Maternal and Child Health Programs (AMCHP) 2011 (141) |                         |        |                          |             |                        | X            |                  | X                        |                          |                   |                     |                  |                   |                     | X                 | X                   |                                               |                                    |
| Bandali 2014 (142)                                                   | X                       | X      | X                        |             |                        |              | X                |                          | X                        |                   |                     | X                | X                 |                     |                   | X                   | X                                             |                                    |
| Bella et al. 2005 (143)                                              | X                       | X      | X                        |             | X                      | X            | X                |                          | X                        | **<br>NSI         | NSI                 | X                | X                 | X                   | X                 | X                   | X                                             | X                                  |

| Authors/<br>Year                            | Data Collection Methods |        |                          |             |                        |       | Data Sources     |                          |                          |                   |                     |       | Data Source Mode  |                     |                   |                     | Scanning Mode                                 |                                    |
|---------------------------------------------|-------------------------|--------|--------------------------|-------------|------------------------|-------|------------------|--------------------------|--------------------------|-------------------|---------------------|-------|-------------------|---------------------|-------------------|---------------------|-----------------------------------------------|------------------------------------|
|                                             | Literature review       | Survey | Key informant interviews | Focus group | Other personal contact | Other | Personal sources | Administrative databases | Reports or internal docs | Academic database | Internet web search | Other | Internal personal | Internal impersonal | External personal | External impersonal | Conditioned viewing - Passive data collection | Searching - Active data collection |
| Blackman 2018 (144)                         | X                       |        | X                        |             |                        |       | X                |                          |                          | X                 |                     |       |                   | X                   | X                 | X                   | X                                             |                                    |
| Boonyasai et al. 2014 (145)                 | X                       |        | X                        |             |                        | X     | X                | X                        |                          |                   | X                   |       |                   | X                   | X                 | X                   | X                                             |                                    |
| Campos & Manning 2006 (146)                 | X                       |        | X                        | X           |                        |       | X                | X                        |                          |                   |                     | X     | X                 | X                   | X                 | X                   | X                                             |                                    |
| Cowling & Dolcine 2017 (147)                | X                       | X      | X                        |             |                        |       | X                |                          | X                        | X                 |                     |       |                   | X                   | X                 | X                   | X                                             |                                    |
| Deshpande, Khoja, Lorca, et al. 2008a (148) | X                       |        |                          |             | X                      |       | X                |                          | X                        | X                 |                     |       |                   | X                   | X                 | X                   | X                                             |                                    |

| Authors/<br>Year                                   | Data Collection Methods |        |                          |             |                        |       | Data Sources     |                          |                          |                   |                     |       | Data Source Mode  |                     |                   |                     | Scanning<br>Mode                              |                                    |
|----------------------------------------------------|-------------------------|--------|--------------------------|-------------|------------------------|-------|------------------|--------------------------|--------------------------|-------------------|---------------------|-------|-------------------|---------------------|-------------------|---------------------|-----------------------------------------------|------------------------------------|
|                                                    | Literature review       | Survey | Key informant interviews | Focus group | Other personal contact | Other | Personal sources | Administrative databases | Reports or internal docs | Academic database | Internet web search | Other | Internal personal | Internal impersonal | External personal | External impersonal | Conditioned viewing - Passive data collection | Searching - Active data collection |
| Deshpande, Khola, McKibbin et al. 2008b (149)      | X                       |        |                          |             | X                      |       | X                |                          | X                        | X                 |                     |       |                   | X                   | X                 | X                   | X                                             |                                    |
| Dietitians of Canada 2018 (150)                    | X                       |        | X                        |             |                        |       | X                | X                        |                          | X                 |                     |       |                   | X                   | X                 | X                   | X                                             |                                    |
| Forsberg et al. 2014 (151)                         | X                       |        |                          |             |                        |       |                  |                          | X                        | X                 |                     |       |                   |                     | X                 | X                   |                                               |                                    |
| Garland 2015 (152)                                 | X                       | X      |                          |             |                        |       | X                |                          | X                        | X                 |                     |       |                   | X                   | X                 | X                   | X                                             |                                    |
| Great Plains Quality innovation Network 2016 (153) |                         | X      |                          |             |                        |       | X                |                          |                          |                   |                     | X     |                   |                     |                   |                     | X                                             |                                    |

| Authors/<br>Year                 | Data Collection Methods |        |                          |             |                        |       | Data Sources     |                          |                          |                   |                     |       | Data Source Mode  |                     |                   |                     | Scanning Mode                                 |                                    |
|----------------------------------|-------------------------|--------|--------------------------|-------------|------------------------|-------|------------------|--------------------------|--------------------------|-------------------|---------------------|-------|-------------------|---------------------|-------------------|---------------------|-----------------------------------------------|------------------------------------|
|                                  | Literature review       | Survey | Key informant interviews | Focus group | Other personal contact | Other | Personal sources | Administrative databases | Reports or internal docs | Academic database | Internet web search | Other | Internal personal | Internal impersonal | External personal | External impersonal | Conditioned viewing - Passive data collection | Searching - Active data collection |
| Health Tech Solutions 2018 (154) |                         | X      |                          |             |                        |       | X                |                          |                          |                   |                     | X     |                   | X                   |                   |                     |                                               | X                                  |
| Hochman 2017 (155)               | X                       |        |                          |             |                        |       |                  |                          | X                        | X                 |                     |       |                   |                     | X                 | X                   |                                               |                                    |
| Loorand-Stiver 2012a (156)       |                         |        | X                        |             |                        |       | X                |                          |                          |                   |                     |       |                   | X                   |                   |                     |                                               | X                                  |
| Loorand-Stiver 2012b (157)       | X                       |        | X                        |             |                        |       | X                |                          | NSI                      | NSI               |                     |       |                   | X                   | X                 | X                   |                                               | X                                  |
| Mason & Ford 2017 (158)          | X                       | X      |                          |             | X                      |       | X                |                          | X                        | X                 |                     |       |                   | X                   | X                 | X                   |                                               | X                                  |
| McGrath et al. 2017 (159)        | X                       |        | X                        |             |                        |       | X                |                          |                          | X                 |                     |       |                   | X                   | X                 | X                   |                                               | X                                  |

| Authors/<br>Year             | Data Collection Methods |        |                          |             |                        |       | Data Sources     |                          |                          |                   |                     |       | Data Source Mode  |                     |                   |                     | Scanning<br>Mode                              |                                    |
|------------------------------|-------------------------|--------|--------------------------|-------------|------------------------|-------|------------------|--------------------------|--------------------------|-------------------|---------------------|-------|-------------------|---------------------|-------------------|---------------------|-----------------------------------------------|------------------------------------|
|                              | Literature review       | Survey | Key informant interviews | Focus group | Other personal contact | Other | Personal sources | Administrative databases | Reports or internal docs | Academic database | Internet web search | Other | Internal personal | Internal impersonal | External personal | External impersonal | Conditioned viewing - Passive data collection | Searching - Active data collection |
| Medstar et al. 2017 (170)    | X                       | X      | X                        |             |                        | X     | X                | X                        | X                        | X                 | X                   | X     |                   | X                   | X                 | X                   | X                                             |                                    |
| Moran et al. 2017 (160)      | X                       |        |                          |             |                        |       |                  |                          | X                        | X                 |                     |       |                   |                     | X                 | X                   |                                               |                                    |
| Morrison 2009 (161)          | X                       |        | X                        |             |                        |       | X                |                          | NSI                      | NSI               |                     |       |                   | X                   | X                 | X                   | X                                             |                                    |
| Morrison & Dowler 2011 (162) | X                       |        | X                        |             |                        |       | X                |                          | NSI                      | NSI               |                     |       |                   | X                   | X                 | X                   | X                                             |                                    |
| Murzin & Furlotte 2013 (163) |                         | X      |                          |             |                        |       | X                |                          |                          |                   |                     | X     |                   | X                   |                   |                     | X                                             |                                    |
| Ndegwa, 2010 (164)           | X                       |        | X                        |             |                        |       | X                |                          | NSI                      | NSI               |                     |       |                   | X                   | X                 | X                   | X                                             |                                    |
| Ndegwa 2011 (165)            | X                       |        | X                        |             |                        |       | X                |                          |                          | X                 |                     |       |                   | X                   | X                 | X                   | X                                             |                                    |



1  
2  
3  
4  
5  
6  
7  
8  
9  
10  
11  
12  
13  
14  
15  
16  
17  
18  
19  
20  
21  
22  
23  
24  
25  
26  
27  
28  
29  
30  
31  
32  
33  
34  
35  
36  
37  
38  
39  
40  
41  
42  
43  
44  
45  
46  
47

| Authors/<br>Year            | Data Collection Methods |        |                          |             |                  |       | Data Sources     |                          |                          |                   |                     |       | Data Source Mode  |                     |                   |                     | Scanning Mode                                 |                                    |
|-----------------------------|-------------------------|--------|--------------------------|-------------|------------------|-------|------------------|--------------------------|--------------------------|-------------------|---------------------|-------|-------------------|---------------------|-------------------|---------------------|-----------------------------------------------|------------------------------------|
|                             | Literature review       | Survey | Key informant interviews | Focus group | Personal contact | Other | Personal sources | Administrative databases | Reports or internal docs | Academic database | Internet web search | Other | Internal personal | Internal impersonal | External personal | External impersonal | Conditioned viewing - Passive data collection | Searching - Active data collection |
| Ndegwa et al. 2018 (166)    | X                       | X      | X                        |             |                  |       | X                |                          | X                        | X                 |                     |       |                   | X                   | X                 | X                   | X                                             |                                    |
| Paccagnan et al. 2017 (167) | X                       | X      |                          |             |                  | X     | X                |                          | X                        | X                 |                     | X     | X                 | X                   | X                 | X                   | X                                             |                                    |
| Seal et al 2018 (168)       | X                       | X      | X                        |             |                  |       | X                |                          | X                        | X                 |                     |       |                   | X                   | X                 | X                   | X                                             |                                    |
| Smith 2001 (169)            |                         | X      |                          |             |                  |       | X                |                          |                          |                   |                     | X     |                   |                     |                   |                     | X                                             |                                    |
| Topfer & Spry 2019 (171)    | X                       | X      | X                        |             |                  |       | X                |                          | X                        | X                 |                     |       |                   | X                   | X                 | X                   | X                                             |                                    |
| Tran et al. 2008 (172)      | X                       |        | X                        |             |                  |       | X                | X                        |                          | X                 |                     |       |                   | X                   | X                 | X                   | X                                             |                                    |
| Wells et al. 2019 (173)     | X                       | X      |                          |             |                  |       | X                |                          | X                        | X                 |                     |       |                   | X                   | X                 | X                   | X                                             |                                    |

| Authors/<br>Year         | Data Collection Methods |        |                          |             |                  |       | Data Sources     |                          |                          |                   |                     |       | Data Source Mode  |                     |                   |                     | Scanning Mode                                 |                                    |
|--------------------------|-------------------------|--------|--------------------------|-------------|------------------|-------|------------------|--------------------------|--------------------------|-------------------|---------------------|-------|-------------------|---------------------|-------------------|---------------------|-----------------------------------------------|------------------------------------|
|                          | Literature review       | Survey | Key informant interviews | Focus group | Personal contact | Other | Personal sources | Administrative Databases | Reports or internal docs | Academic database | Internet web search | Other | Internal personal | Internal impersonal | External personal | External impersonal | Conditioned viewing - Passive data collection | Searching - Active data collection |
| Young et al. 2018 (174)  |                         | X      |                          |             |                  |       | X                |                          |                          |                   |                     |       |                   |                     | X                 |                     |                                               | X                                  |
| Yurick et al. 2016 (175) |                         |        | X                        |             |                  |       | X                |                          |                          |                   |                     | X     |                   | X                   |                   |                     |                                               | X                                  |

\* The data collection methods, data sources, data source mode, and scanning mode refer only to the environmental scanning component of the study. \*\*NSI = not clear or not specifically reported

1  
2  
3  
4 **Supplementary file 6**

5 **Definitions of Environmental Scan**

6

---

7 **Author** **Definition**

8

---

9

10 Bakhru et al, 2015 [87] “An environmental scan is defined as a review of current structures, processes and outcomes of care, and barriers to the new process understood in the context of the ecosystem (in this case, the ICU)” p. [87] p. 2361

11

12

13

14

15

16 Bednar et al., 2018 [90] “An ES is a mixed-methods tool used in business, government, and public health to collect information, identify risks and opportunities, tailor strategic plans, or design programs in a flexible, rapid, comprehensive, low-cost manner”. [51,54,183] p. 1483

17

18

19

20

21

22

23

24 Fong et al., 2018 [99] “A built environmental scan is an objective review of the environmental factors that influence an organization; those factors can include programs, policies, and physical features (for example, the availability of visible, safe, and clean stairs for walking) within an organization” [51] p. e366

25

26

27

28

29

30

31 Glurich et al., 2017 [101] “Ad hoc environmental scans are cross sectional surveys undertaken at unspecified frequency, for the purpose of reviewing the current relevant evidence base across a range of sources in an attempt to ascertain the current state of the art surrounding the specific topic under focus. Such scans are conducted to collect information that may inform future planning of various vested stakeholders”. [101] p. 22

32

33

34

35

36

37

38

39

40 Leiva Portocarre ro et al., 2015 [110] “Environmental scans were developed as tools for retrieving and organizing data from a wide variety of fields in order to identify contexts and shifts in planning for the future. They can include internal (memos, notes from meetings with stakeholders, etc) as well as external sources (e.g. newly available technologies)” [54]

41

42

43

44

45

46

47 Medstar et al., 2017 [170] “An environmental scan is an integral process for identifying, retrieving, and organizing information to enable health decision making and has been used to foster knowledge translation in primary care.” [54,181] p. 2

48

49

50

51

52

---

53

54

55

56

57

58

59

60

- 1  
2  
3  
4 Moore et al., 2015 [118] “An environmental scan has been defined as the acquisition and use of information about events, trends and relationships in an organization’s external environment, the knowledge of which would assist management in planning the organization’s future course of action”. [2] p. 303  
5  
6  
7  
8  
9
- 10 Naumann et al., 2013 [56] “In comparison, environmental scans are emerging as an effective tool to collect evidence pertaining to healthcare service delivery gaps...Originating within the business context as a valuable method for retrieving and organizing needs assessment data, the environmental scan methodology has been growing in use and complexity, recently emerging as a popular method of effectively determining the health care needs of communities.” [54,55] p. 32, 35  
11  
12  
13  
14  
15  
16  
17  
18  
19
- 20 Richard et al., 2016 [127] “Environmental scanning is a research approach that uses wide-scope screening methods to identify the new, the unexpected and the emerging interventions, issues and challenges in health” [54]  
21  
22  
23  
24  
25
- 26 Rowel et al., 2005 [51] “The environmental scan is a tool that can be utilized to collect data to design health programs uniquely tailored to the needs of communities.” [51] p. 527 “Environmental scanning is the acquisition and use of information about events, trends and relationships in an organization's external environment, the knowledge of which would assist management in planning the organization's future course of action." p. 529 [2] and " environmental scanning as "a systematic and continuous effort to search for important cues about how the world is changing and how these changes are likely to affect your organization.“ [176] p.529  
27  
28  
29  
30  
31  
32  
33  
34  
35  
36  
37  
38
- 39 Scime et al., 2018 [129] “Despite origins in a business context a tool for gathering information to enable strategic action p. 203 [2,54] ... Specifically, environmental scans are suitable for the identification and synthesis of evidence about existing resources, organizational processes, barriers and facilitators to action, and/or knowledge and practice gaps pertaining to the topic under study. [51] p. 203  
40  
41  
42  
43  
44  
45  
46  
47
- 48 Shahid et al., 2008 [77] “(ES)...is used to identify emerging issues within the broader economic and political environment. [184] It is similar to situational analysis in which a review is undertaken of health strategies and policies, institutional support systems with the aim of strengthening health reform and health systems. Morrison argues that environmental scanning is a method that enables decision makers both the understand the external  
49  
50  
51  
52  
53  
54  
55  
56  
57  
58  
59  
60

1  
2  
3  
4 environment and the interconnections of its various sectors and to  
5 translate this understanding into an institution 's planning and decision-  
6 making processes." [182] "...The advantage of environmental scanning  
7 for organizational leaders is that knowing the internal and external  
8 environment in which the organization operates is helpful in planning  
9 their future course of action." [2] p. 57  
10  
11

12 Tark et al., "Environmental scanning is a research method in which publicly  
13 2019 available information is gathered systematically and is used to evaluate  
14 [131] both internal and external environments of organizations, organizational  
15 practices, and health programs. It produces important insights on current  
16 trends and occurrences based on existing resources and can assist with the  
17 development of evidence-based policies in future practices" [131] p.  
18 1033.  
19  
20  
21

22 Wittich et "In healthcare research, the environmental scan is often employed as a  
23 al., 2018 needs-assessment tool for the purposes of  
24 [136] improving and developing the efficiency of health service  
25 programs and evidence-based policies. In using  
26 this approach, environmental or contextual factors are  
27 evaluated by reviewing existing data or actively collecting  
28 new data in the form of surveys or interviews, including a  
29 diversity of views and information, to determine the benefits,  
30 needs and efficiencies of practices within that environment. [51,54] p. 2-3.  
31  
32  
33  
34

---

## Preferred Reporting Items for Systematic reviews and Meta-Analyses extension for Scoping Reviews (PRISMA-ScR) Checklist

| SECTION                                               | ITEM | PRISMA-ScR CHECKLIST ITEM                                                                                                                                                                                                                                                                                  | REPORTED ON PAGE #        |
|-------------------------------------------------------|------|------------------------------------------------------------------------------------------------------------------------------------------------------------------------------------------------------------------------------------------------------------------------------------------------------------|---------------------------|
| <b>TITLE</b>                                          |      |                                                                                                                                                                                                                                                                                                            |                           |
| Title                                                 | 1    | Identify the report as a scoping review.                                                                                                                                                                                                                                                                   | 2                         |
| <b>ABSTRACT</b>                                       |      |                                                                                                                                                                                                                                                                                                            |                           |
| Structured summary                                    | 2    | Provide a structured summary that includes (as applicable): background, objectives, eligibility criteria, sources of evidence, charting methods, results, and conclusions that relate to the review questions and objectives.                                                                              | 2                         |
| <b>INTRODUCTION</b>                                   |      |                                                                                                                                                                                                                                                                                                            |                           |
| Rationale                                             | 3    | Describe the rationale for the review in the context of what is already known. Explain why the review questions/objectives lend themselves to a scoping review approach.                                                                                                                                   | 7-8                       |
| Objectives                                            | 4    | Provide an explicit statement of the questions and objectives being addressed with reference to their key elements (e.g., population or participants, concepts, and context) or other relevant key elements used to conceptualize the review questions and/or objectives.                                  | 9-11                      |
| <b>METHODS</b>                                        |      |                                                                                                                                                                                                                                                                                                            |                           |
| Protocol and registration                             | 5    | Indicate whether a review protocol exists; state if and where it can be accessed (e.g., a Web address); and if available, provide registration information, including the registration number.                                                                                                             | 9                         |
| Eligibility criteria                                  | 6    | Specify characteristics of the sources of evidence used as eligibility criteria (e.g., years considered, language, and publication status), and provide a rationale.                                                                                                                                       | 12-13                     |
| Information sources*                                  | 7    | Describe all information sources in the search (e.g., databases with dates of coverage and contact with authors to identify additional sources), as well as the date the most recent search was executed.                                                                                                  | 11-12                     |
| Search                                                | 8    | Present the full electronic search strategy for at least 1 database, including any limits used, such that it could be repeated.                                                                                                                                                                            | 13                        |
| Selection of sources of evidence†                     | 9    | State the process for selecting sources of evidence (i.e., screening and eligibility) included in the scoping review.                                                                                                                                                                                      | 11-12                     |
| Data charting process‡                                | 10   | Describe the methods of charting data from the included sources of evidence (e.g., calibrated forms or forms that have been tested by the team before their use, and whether data charting was done independently or in duplicate) and any processes for obtaining and confirming data from investigators. | 13-14                     |
| Data items                                            | 11   | List and define all variables for which data were sought and any assumptions and simplifications made.                                                                                                                                                                                                     | 13-14                     |
| Critical appraisal of individual sources of evidence§ | 12   | If done, provide a rationale for conducting a critical appraisal of included sources of evidence; describe the methods used and how this information was used in any data synthesis (if appropriate).                                                                                                      | Click here to enter text. |

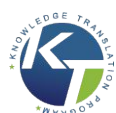

| SECTION                                       | ITEM | PRISMA-ScR CHECKLIST ITEM                                                                                                                                                                       | REPORTED ON PAGE #        |
|-----------------------------------------------|------|-------------------------------------------------------------------------------------------------------------------------------------------------------------------------------------------------|---------------------------|
| Synthesis of results                          | 13   | Describe the methods of handling and summarizing the data that were charted.                                                                                                                    | 15                        |
| <b>RESULTS</b>                                |      |                                                                                                                                                                                                 |                           |
| Selection of sources of evidence              | 14   | Give numbers of sources of evidence screened, assessed for eligibility, and included in the review, with reasons for exclusions at each stage, ideally using a flow diagram.                    | 15                        |
| Characteristics of sources of evidence        | 15   | For each source of evidence, present characteristics for which data were charted and provide the citations.                                                                                     | 16-25                     |
| Critical appraisal within sources of evidence | 16   | If done, present data on critical appraisal of included sources of evidence (see item 12).                                                                                                      | Click here to enter text. |
| Results of individual sources of evidence     | 17   | For each included source of evidence, present the relevant data that were charted that relate to the review questions and objectives.                                                           | 16-25                     |
| Synthesis of results                          | 18   | Summarize and/or present the charting results as they relate to the review questions and objectives.                                                                                            | 16-25                     |
| <b>DISCUSSION</b>                             |      |                                                                                                                                                                                                 |                           |
| Summary of evidence                           | 19   | Summarize the main results (including an overview of concepts, themes, and types of evidence available), link to the review questions and objectives, and consider the relevance to key groups. | 25-30                     |
| Limitations                                   | 20   | Discuss the limitations of the scoping review process.                                                                                                                                          | 4                         |
| Conclusions                                   | 21   | Provide a general interpretation of the results with respect to the review questions and objectives, as well as potential implications and/or next steps.                                       | 30-31                     |
| <b>FUNDING</b>                                |      |                                                                                                                                                                                                 |                           |
| Funding                                       | 22   | Describe sources of funding for the included sources of evidence, as well as sources of funding for the scoping review. Describe the role of the funders of the scoping review.                 | 31                        |

JBI = Joanna Briggs Institute; PRISMA-ScR = Preferred Reporting Items for Systematic reviews and Meta-Analyses extension for Scoping Reviews.

\* Where *sources of evidence* (see second footnote) are compiled from, such as bibliographic databases, social media platforms, and Web sites.

† A more inclusive/heterogeneous term used to account for the different types of evidence or data sources (e.g., quantitative and/or qualitative research, expert opinion, and policy documents) that may be eligible in a scoping review as opposed to only studies. This is not to be confused with *information sources* (see first footnote).

‡ The frameworks by Arksey and O'Malley (6) and Levac and colleagues (7) and the JBI guidance (4, 5) refer to the process of data extraction in a scoping review as data charting.

§ The process of systematically examining research evidence to assess its validity, results, and relevance before using it to inform a decision. This term is used for items 12 and 19 instead of "risk of bias" (which is more applicable to systematic reviews of interventions) to include and acknowledge the various sources of evidence that may be used in a scoping review (e.g., quantitative and/or qualitative research, expert opinion, and policy document).

From: Tricco AC, Lillie E, Zarin W, O'Brien KK, Colquhoun H, Levac D, et al. PRISMA Extension for Scoping Reviews (PRISMA-ScR): Checklist and Explanation. *Ann Intern Med.* 2018;169:467–473. doi: 10.7326/M18-0850.

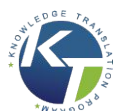

# BMJ Open

## Use of environmental scans in health services delivery research: a scoping review

|                                 |                                                                                                                                                                                                                                                                                                                                                                                                                                                                                                                                                                                                                                                                                                                                                                                                                                                                            |
|---------------------------------|----------------------------------------------------------------------------------------------------------------------------------------------------------------------------------------------------------------------------------------------------------------------------------------------------------------------------------------------------------------------------------------------------------------------------------------------------------------------------------------------------------------------------------------------------------------------------------------------------------------------------------------------------------------------------------------------------------------------------------------------------------------------------------------------------------------------------------------------------------------------------|
| Journal:                        | <i>BMJ Open</i>                                                                                                                                                                                                                                                                                                                                                                                                                                                                                                                                                                                                                                                                                                                                                                                                                                                            |
| Manuscript ID                   | bmjopen-2021-050284.R1                                                                                                                                                                                                                                                                                                                                                                                                                                                                                                                                                                                                                                                                                                                                                                                                                                                     |
| Article Type:                   | Original research                                                                                                                                                                                                                                                                                                                                                                                                                                                                                                                                                                                                                                                                                                                                                                                                                                                          |
| Date Submitted by the Author:   | 05-Aug-2021                                                                                                                                                                                                                                                                                                                                                                                                                                                                                                                                                                                                                                                                                                                                                                                                                                                                |
| Complete List of Authors:       | Charlton, Patricia; University of Prince Edward Island, Adjunct Faculty, Faculty of Nursing<br>Kean, Terri; University of Prince Edward Island, Faculty of Nursing<br>Liu, Rebecca; University of Toronto, Women's College Hospital Institute for Health System Solutions and Virtual Care, Dalla Lana School of Public Health<br>Nagel, Daniel; University of Manitoba Faculty of Health Sciences, College of Nursing<br>Azar, R; Mount Allison University, Psychobiology of Stress and Health Lab, Psychology Department<br>Doucet, Shelley; University of New Brunswick, Department of Nursing and Health Sciences<br>Luke, Alison; University of New Brunswick, Department of Nursing and Health Sciences, Centre for Research in Integrated Care<br>Montelpare, William; University of Prince Edward Island, Department of Applied Human Sciences, Faculty of Science |
| <b>Primary Subject Heading</b>: | Health services research                                                                                                                                                                                                                                                                                                                                                                                                                                                                                                                                                                                                                                                                                                                                                                                                                                                   |
| Secondary Subject Heading:      | Health services research                                                                                                                                                                                                                                                                                                                                                                                                                                                                                                                                                                                                                                                                                                                                                                                                                                                   |
| Keywords:                       | PUBLIC HEALTH, STATISTICS & RESEARCH METHODS, Health policy < HEALTH SERVICES ADMINISTRATION & MANAGEMENT                                                                                                                                                                                                                                                                                                                                                                                                                                                                                                                                                                                                                                                                                                                                                                  |
|                                 |                                                                                                                                                                                                                                                                                                                                                                                                                                                                                                                                                                                                                                                                                                                                                                                                                                                                            |

SCHOLARONE™  
Manuscripts



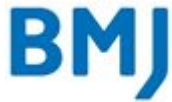

I, the Submitting Author has the right to grant and does grant on behalf of all authors of the Work (as defined in the below author licence), an exclusive licence and/or a non-exclusive licence for contributions from authors who are: i) UK Crown employees; ii) where BMJ has agreed a CC-BY licence shall apply, and/or iii) in accordance with the terms applicable for US Federal Government officers or employees acting as part of their official duties; on a worldwide, perpetual, irrevocable, royalty-free basis to BMJ Publishing Group Ltd ("BMJ") its licensees and where the relevant Journal is co-owned by BMJ to the co-owners of the Journal, to publish the Work in this journal and any other BMJ products and to exploit all rights, as set out in our [licence](#).

The Submitting Author accepts and understands that any supply made under these terms is made by BMJ to the Submitting Author unless you are acting as an employee on behalf of your employer or a postgraduate student of an affiliated institution which is paying any applicable article publishing charge ("APC") for Open Access articles. Where the Submitting Author wishes to make the Work available on an Open Access basis (and intends to pay the relevant APC), the terms of reuse of such Open Access shall be governed by a Creative Commons licence – details of these licences and which [Creative Commons](#) licence will apply to this Work are set out in our licence referred to above.

Other than as permitted in any relevant BMJ Author's Self Archiving Policies, I confirm this Work has not been accepted for publication elsewhere, is not being considered for publication elsewhere and does not duplicate material already published. I confirm all authors consent to publication of this Work and authorise the granting of this licence.

## Manuscript Title

### Use of environmental scans in health services delivery research: a scoping review

**Corresponding author:** Patricia Charlton, PhD, Adjunct Faculty, Faculty of Nursing, University of Prince Edward Island, 550 University Avenue, Charlottetown, PEI. C1A 4P3. Canada.

Email: [pcharlton@upei.ca](mailto:pcharlton@upei.ca)

#### Co-authors:

Terri Kean, Faculty of Nursing, University of Prince Edward Island, Charlottetown, PEI. Canada

Rebecca H Liu, PhD, Women's College Hospital Institute for Health Systems Solutions and Virtual Care, University of Toronto, Dalla Lama School of Public Health, Toronto, Ontario, Canada

Daniel A. Nagel, RN, PhD, College of Nursing, Rady Faculty of Health Sciences, University of Manitoba, Winnipeg, Manitoba, Canada

Rima Azar, PhD. Psychobiology of Stress and Health Lab, Psychology Department, Mount Allison University, Sackville, New Brunswick, Canada

Shelley Doucet, PhD, Department of Nursing and Health Sciences, University of New Brunswick in Saint John. Saint John, New Brunswick, Canada

Alison Luke, PhD, Department of Nursing and Health Sciences, Centre for Research in Integrated Care, University of New Brunswick Saint John. Saint John, NB. Canada

William Montelpare, PhD, Department of Applied Human Sciences, Faculty of Science, University of Prince Edward Island, Charlottetown, PEI. Canada

Word count: 4279 not including Abstract, Funding, Contributors, Competing Interests, Ethics Approval, Data Availability Statement, Acknowledgements

August 4, 2021

## Use of environmental scans in health services delivery research:

### A scoping review

#### ABSTRACT

##### Objective

To examine the extent and nature of evidence on the use of the environmental scan (ES) in the health services delivery literature.

##### Design

 Scoping review

**Methods** This scoping review followed the five-stage scoping review methodology outlined by Khalil et al. A Peer Review of Electronic Search Strategies (PRESS) was completed. Seven electronic databases and the grey literature were searched. Pairs of researchers independently performed two levels of screening and the data extraction. Data were analyzed using qualitative content and thematic analysis.

**Results** Ninety-six studies were included in the scoping review. Researchers conducted environmental scans for many purposes, the most common being to examine current state of programs, services, or policies. Recommendations were informed by ESs in 20% of the studies. Most common data collection methods were literature review (70%), key informant or semi-structured interviews (50%), and surveys (34%). Almost half (49%) of the studies used a combination of passive (collecting existing information) and active (creating new information) approaches to data collection. Person sources of data (e.g., health care stakeholders, community representatives) and non-person sources of data (e.g., electronic databases, the web, and other documents) were drawn upon to a similar extent. The thematic analysis of the definitions yielded several themes including instrument of discovery, knowledge synthesis, forward-looking, and

1  
2  
3 decision-making. Research gaps identified included absence of a standard definition,  
4  
5 inconsistencies in terminology, and lack of guiding frameworks in the health services delivery  
6  
7 context.  
8  
9

10 **Conclusion** ESs were conducted to gather evidence and inform decision-making on a range of  
11  
12 policy and health services delivery issues across the continuum of care. Consistency in  
13  
14 terminology, a consensus definition, and more guidance on ES design may help provide structure  
15  
16 for researchers and other stakeholders, and ultimately advance ES as a methodological approach.  
17  
18 A working definition of ES in health services delivery context is presented.  
19  
20  
21  
22

23 **Key Words:** environmental scan, health care, health services delivery, scoping review, protocol,  
24  
25 research design  
26  
27  
28  
29  
30  
31  
32  
33  
34  
35  
36  
37  
38  
39  
40  
41  
42  
43  
44  
45  
46  
47  
48  
49  
50  
51  
52  
53  
54  
55  
56  
57  
58  
59  
60

## Strengths and limitations

### Strengths

- This scoping review addresses an important knowledge gap - the use of environmental scans in the health services delivery literature - and includes a comprehensive analysis of the peer-reviewed and grey literature.
- The study followed established and systematic methods for conducting scoping reviews.

### Limitations

- For the grey literature search, limits were placed on the number of platforms searched and articles selected per platform. Some relevant studies may have been missed; however, our comprehensive search strategy helped mitigate this limitation.
- Only English-language studies were considered for this scoping review.
- The included studies were not assessed for methodological quality.

## Use of environmental scans in health services delivery research: A scoping review

### INTRODUCTION

Environmental scanning, a process designed to gather information to inform and direct organizational change, is deeply rooted in the business sector.[1] Leaders in other sectors over the past several decades have come to understand the need to acquire, organize, evaluate, and mobilize different kinds of knowledge to inform decision-making processes, anticipate and interpret trends, adapt organizational behaviour, energize organizational growth, mitigate institutional risk, and develop strategies in response to rapidly changing environments. [2-8]

#### *Scanning characteristics*

Environmental scanning can range from formal to informal activity and is influenced by individual, contextual, and organizational factors.[1,9-13] Formal scanning is systematic, continuous, proactive, prospective, and coordinated, and is undertaken to inform decision-making on circulating trends, threats, or issues.[1,5,14,15] Environmental scanning may also be conducted on a less formal, irregular, and reactive basis often triggered by a crisis or specific issue.[11,14-17] Regardless of the approach, environmental scanning forms a primary means of organizational learning.[1,2]

Environmental scanning is integral to strategic planning and involves an analysis of an organization's external and internal environments.[2,13,18-21] The external environment includes elements outside the boundaries of an organization (e.g., political, technological, political/legal, socio-cultural environments and/or information from customers, suppliers, strategic partners, etc.).[19,22,23] The internal environment may include elements of an organization e.g., structure, budget, workforce capacity, and/or leadership).[23-27]

1  
2  
3 Information is drawn from person sources (e.g., staff, community, experts) and/or non-  
4 person sources (e.g., databases, documents, the Web).[5,6,28,29] Person and non-person sources  
5  
6 may be internal (accessible within the boundaries of an organization) or external (accessible  
7  
8 beyond the boundaries of an organization).[4,5,28] The selection of data sources may be  
9  
10 influenced by accessibility to information, quality of information, and environmental uncertainty  
11  
12 (constant change within an environment).[10,11,24,30,31]  
13  
14  
15

### 16 17 **Environmental Scans and Health Services Delivery** 18

19 While environmental scanning is conducted by healthcare organizations as part of  
20 strategic planning [32-36], an *environmental scan* (ES) is frequently reported in health literature  
21 as a methodological approach to examine a specific health issue. For example, environmental  
22 scans have been used to: explore patient safety education and health care provider training  
23 programs [37,38]; create quality indicators for health services (e.g., fall prevention and adult  
24 critical care) [39,40]; inform the design of cancer prevention programs [29,41] and; explore the  
25 availability of health information resources.[42] Several studies have noted the utility of ESs for  
26 assessing community needs and for program and policy development.[28,29,41,43]  
27  
28  
29  
30  
31  
32  
33  
34  
35  
36  
37

38 Despite the potential of ESs to inform policy and practice, consensus on a working  
39 definition does not appear to exist [29,41,44] and practical guidance to design and/or implement  
40 ESs is lacking in the literature. [41,45] Guiding frameworks or models exist in the business and  
41 other sectors [2,5,14,16,46-48], yet ES frameworks specific to health services delivery are  
42 comparatively limited.[28,29,41,43,44] To build on previous research and address the knowledge  
43 gaps noted above, this scoping review provides a synthesis of evidence about the nature and  
44 extent of the use of ES in the health services delivery literature. To our knowledge, this is the  
45  
46  
47  
48  
49  
50  
51  
52  
53  
54  
55  
56  
57  
58  
59  
60

1  
2  
3 first scoping review on this topic. Research and evaluation of ESs may enhance the approach to  
4  
5 ES and its utility to support decision-making in health policy and practice. [29,41,44]  
6

## 7 8 **METHODS**

9  
10 This scoping review followed the five-stage methodology outlined by Khalil et al. (2016) that  
11  
12 builds on previous scoping review methodologies of Arksey and O'Malley, Levac et al., and the  
13  
14 Joanna Briggs Institute.[49-55] The PRISMA Extension for Scoping Reviews (PRISMA-ScR)  
15  
16 reporting guidelines were also followed.[51,56] The steps for the review are briefly presented  
17  
18 here; however, a full description of the scoping review protocol can be found in Charlton,  
19  
20 Doucet, Azar et al. (2019).[45]  
21  
22

### 23 **Identifying the research questions**

24  
25  
26 The research questions for this scoping review were:

- 27  
28 1. How have ESs been conceptualized and operationalized by stakeholders in the health  
29  
30 services delivery literature? (e.g., characteristics including existing definitions, ES  
31  
32 purpose, healthcare issues, settings, data collection approaches, methods, data  
33  
34 sources, scanning modes)  
35  
36
- 37  
38 2. What limitations, if any, were described in the included studies that use ESs in the  
39  
40 context of health services delivery?  
41

### 42 **Identifying relevant studies**

43  
44 A three-step search strategy was developed by an experienced librarian (LB) with the research  
45  
46 team and peer reviewed (KM) based on the Peer Review of Electronic Search Strategies  
47  
48 (PRESS) guidelines.[57,58]. Seven electronic databases were searched: CINAHL, MEDLINE,  
49  
50 PsycINFO, ERIC, Embase, Canadian Business & Current Affairs (CBCA), and Academic  
51  
52 Search Premier (see supplementary file 1 for an example of the search strategy for Medline).  
53  
54  
55  
56  
57  
58  
59  
60



1  
2  
3 Relevant grey literature was identified through searches of Google Scholar, the New York  
4 Academy of Medicine Library Online Catalog[59] and *Grey Matters*, a resource developed by  
5 the Canadian Agency for Drugs and Technologies in Health (CADTH) [60] for searching health-  
6 related grey literature, using the search term “environmental scan”. A Google search was also  
7 conducted using the search terms “environmental scan and health services”. To balance  
8 comprehensiveness with feasibility, the searches of Google, Google Scholar, and the NYAM,  
9 were limited to the first 10 pages (or first 100 hits). For CADTH’s Grey Matters, the top 10  
10 websites/databases deemed most relevant to the objectives of the study were selected to identify  
11 studies. Despite the limits placed on the grey literature search, this comprehensive search  
12 strategy appeared to yield hits that were representative of literature related to the topic of interest.  
13  
14 The reference lists of peer-reviewed sources were also hand searched for relevant studies.  
15  
16

### 17 **Selecting Studies**

18  
19 Articles considered for inclusion were specific to health services delivery, published in English,  
20 and reported on the use of an “environmental scan” as a methodological approach. No limitations  
21 were placed on publication date, population, health service, health care setting (e.g., primary  
22 care, acute care, etc.), health care discipline, or geographic location.  
23  
24

25  
26 Two reviewers independently screened titles and abstracts (PC, KT) and full-text articles  
27 of the peer-reviewed literature (PC, TK) to assess for study eligibility. Pilot tests were conducted  
28 at the beginning of first level (titles and abstracts) and second level (full-text) screening to  
29 evaluate reviewer agreement and to ensure consistency. Similarly, for the grey literature, six  
30 team members worked in pairs to conduct both levels of screening (RHL, DAN, AL, TK, RA,  
31 and PC). Disagreements on study selection in the screening process were resolved through  
32  
33  
34  
35  
36  
37  
38  
39  
40  
41  
42  
43  
44  
45  
46  
47  
48  
49  
50  
51  
52  
53  
54  
55  
56  
57  
58  
59  
60

1  
2  
3 discussion or, if necessary, by a third reviewer (PC, TK, WJM). A modified version of the  
4 PRISMA flowchart for this review is found in Figure 1.[56,61]  
5  
6

### 7 **Charting the data**

8  
9  
10 The team developed a standardized data extraction form to chart the data. Extracted data  
11 elements included author, country, publication year, publication type, purpose of the study,  
12 purpose of ES, health condition, health domain, setting, research approach, methods, data  
13 sources, data source mode, scanning mode, as well as other relevant information including  
14 existing definitions, guiding frameworks, and limitations.  
15  
16  
17  
18  
19  
20

21 Working definitions for the extracted data elements were developed to provide clarity and  
22 consistency among researchers during the data extraction process. For instance, *scanning mode*  
23 was recorded following two of the four levels of scanning described in the Choo model [1]-  
24 conditioned viewing and searching. In this model, viewing information (i.e., “looking at”  
25 information), is considered “passive” data collection, while searching (i.e., “looking for”  
26 information) is considered “active” data collection.[1] Similar to Naumann [44], we categorized  
27 scanning mode into two of the four scanning modes described by Choo[1] as these were deemed  
28 most relevant to this review. The term *scanning mode* has also been used to describe data sources  
29 (i.e. internal/external and personal/impersonal) in some studies [31]. Therefore, for clarity the  
30 term *data source mode* was chosen to refer to the environment from where the data source  
31 emerged (i.e., internal or external source) and the nature of the data source (i.e. person/non-  
32 person).  
33  
34  
35  
36  
37  
38  
39  
40  
41  
42  
43  
44  
45  
46  
47  
48

49 Four teams of paired reviewers (PC, TK, PC, RA, TK, AL, RHL, DAN) independently  
50 extracted data from both the peer-reviewed and grey literature. Pilot tests of data extraction were  
51 conducted to assess agreement and promote consistency between reviewers.[52,62] The team  
52  
53  
54  
55  
56  
57  
58  
59  
60

1  
2  
3 identified initial categories for the data elements and additional relevant categories and sub-  
4 levels of categories were added as we became more familiar with the literature. Each pair of  
5 reviewers met regularly to review extraction results and to resolve any discrepancies through  
6 discussion.  
7  
8  
9  
10  
11

## 12 **Figure 1 here – PRISMA Flowchart**

### 13 **Collating results**

14  
15 Content and thematic analysis were used to analyze the extracted data [63,64] The content  
16 analysis included a descriptive analysis using frequency counts and percentages to describe study  
17 characteristics using SAS Edition 3.6. A manual thematic analysis was conducted to illustrate  
18 themes within the definitions of the reviewed studies. Data familiarization was achieved by  
19 reading and re-reading the included articles and the extracted definition-related data. Preliminary  
20 ideas were recorded and coded to reflect potential contribution to a theme. The initial themes  
21 were reviewed and refined until the final themes were determined.  
22  
23  
24  
25  
26  
27  
28  
29  
30  
31  
32

33 All authors reviewed and discussed the preliminary findings. The data are presented in  
34 tabular form which includes a narrative and descriptive numerical summary of the studies'  
35 characteristics (supplementary files 2-5), environmental scan definitions and descriptions  
36 (supplementary file 6), and thematic analysis details (supplementary file 7). Knowledge gaps and  
37 implications for policy, practice, and research are highlighted.  
38  
39  
40  
41  
42  
43  
44

### 45 **Patient or public involvement**

46 No patients or public involved in the design or implementation of the scoping review.  
47  
48  
49  
50

## 51 **RESULTS**

52  
53 Ninety-six studies were included in this scoping review; 60 from peer-reviewed literature  
54 [29,44,65-122] and 36 from grey literature.[123-158] Findings suggest ESs were conducted for a  
55  
56  
57  
58  
59  
60

1  
2  
3 wide range of purposes, defined in various ways, and employed a variety of methods. Few  
4  
5 studies were guided by a methodological framework for conducting an ES. A summary of study  
6  
7 characteristics are presented here (see supplementary files 2-5 for further detail).  
8  
9

## 10 **General characteristics**

### 11 Publication date and country of origin

12  
13 Studies originated from three countries including Canada (68%), USA (28%), and Australia (4%)  
14  
15 with publication dates from 2001 to 2019 inclusive. Among the 96 studies reviewed, the rates of  
16  
17 published studies that used ESs in a health services delivery context increased from about 6%  
18  
19 (2001-2006) to 20% (2008-2011) to 30% (2012-2015) and to 44% (2016-2019).  
20  
21  
22

### 23 Population, healthcare setting and health conditions

24  
25 Populations under inquiry ranged from newborn to older adult and the healthcare setting  
26  
27 spanned the continuum of healthcare services. Most studies (58%) were situated in multiple  
28  
29 settings followed by acute care (9%), primary health care (11%), and Regional Cancer Specialty  
30  
31 Clinics (5%). Several health settings appeared in 4% or less of the studies e.g., ambulatory care,  
32  
33 rehabilitation, palliative care, Veterans Affairs, and emergency services. Of the 96 studies  
34  
35 reviewed, 55% focused on chronic disease, 8% on infections or infectious disease, and 8% other  
36  
37 conditions (e.g., end-of-life, injury); 31% did not focus on a particular health condition.  
38  
39  
40

### 41 Purpose of the ESs

42  
43 The stated purposes of the ESs varied across studies (see Table 1). The two most stated purposes  
44  
45 were to a) examine the current state of programs, services, or policies (82%) and b) identify  
46  
47 patient/community /organization needs, strengths, challenges, barriers, and service gaps (58%).  
48  
49  
50  
51  
52  
53  
54  
55  
56  
57  
58  
59  
60

**Table 1** Stated purpose(s) of the ES within reviewed studies

| Purpose of the ES(s)                                                                                                     | Studies %(n) |
|--------------------------------------------------------------------------------------------------------------------------|--------------|
| Examine the current state of programs, services or policies                                                              | 82% (79)     |
| Identify and/or assess patient/community/organization needs, strengths, challenges, barriers and service gaps            | 58% (56)     |
| Identify and/or assess tools for patient care, or inform development of tools/ education materials/patient-decision aids | 23% (22)     |
| Understand the use or experience of a phenomenon or service                                                              | 22% (21)     |
| Inform program planning, design and/or improvement                                                                       | 20% (19)     |
| Inform recommendations for policy and practice                                                                           | 20% (19)     |
| Identify best practices or innovative practices                                                                          | 15% (14)     |
| Inform/guide quality improvement and/or patient safety initiatives                                                       | 14% (13)     |
| Inform aspects of practice or policy development or change                                                               | 10% (10)     |
| Assess or inform models of care                                                                                          | 10% (10)     |
| Assess or inform clinical practice guidelines                                                                            | 9% (9)       |
| Inform the development of planning or evaluation frameworks                                                              | 8% (8)       |
| Inform improvements in the transition of care                                                                            | 6% (6)       |

|                                            |        |
|--------------------------------------------|--------|
| Inform future research or research program | 6% (6) |
|--------------------------------------------|--------|

|                                                                                     |        |
|-------------------------------------------------------------------------------------|--------|
| Inform standardization of services, processes, structure/organization, and delivery | 3% (3) |
|-------------------------------------------------------------------------------------|--------|

|                                                  |        |
|--------------------------------------------------|--------|
| Understand factors influencing health behaviours | 2% (2) |
|--------------------------------------------------|--------|

|                                                                                        |        |
|----------------------------------------------------------------------------------------|--------|
| Assess or inform other types of guidelines and standards such as for use of technology | 1% (1) |
|----------------------------------------------------------------------------------------|--------|

Note: Percentages do not add to 100 because there may be more than one purpose for an environmental scan.

In 20% of the studies the ES and other methods informed policy and/or practice recommendations. For example, the ES helped to inform recommendations to: improve HPV vaccination rates [68]; improve patient access to clinical information [88]; promote perinatal mental health and support among immigrant women [104]; develop institution-specific policies and procedures on the use of continuous infusion pumps during radiation treatment [69]; develop a model of care for osteoarthritis management [150]; and develop standards of care for cancer diagnostic assessment programs [74].

#### Data collection approach and methods used in the ES

The research designs included in ESs were: qualitative (57%), mixed (31%), and quantitative methods (11%). A variety of data collection methods were used; about 64% of the studies used more than one data collection method. Within the ES of the study, the most common data collection methods were literature review (i.e., peer-reviewed and grey literature) (70%) followed by key informant or semi-structured interviews (50%), surveys (34%), other types of personal contact such as community advisory groups and expert panels, (24%) and focus groups (3%).

### Scanning mode and sources

About 27% of the studies relied solely on active data collection methods while 22% used passive data collection methods. Nearly half (49%) reported using a combination of passive and active data collection methods.

Over half (52%) of the studies used a combination of person and non-person sources, 24% used only person data sources and 24% used only non-person data sources. Non-person data sources included: the Web (57%), academic databases (35%), reports, documents or other grey literature (30%), administrative databases (3%), and other sources such as social media, list serves, and checklists (13%). Almost three-quarters of the studies (71%) included external data sources and 33% included internal sources.

Data source modes were classified into one of four categories: internal person sources, internal non-person sources, external person sources, and external non-person sources. Overall, about 68% of the studies included external non-person sources, 65% external person sources, 32% internal person sources, and 18% internal non-person sources. Eight percent of studies included all four data source modes.

### **Conceptual characteristics**

#### ES definition and description

Less than one quarter (22%) of the studies provided a definition and/or a description of ES.

Within the 21 studies that provided this information (18 peer-reviewed and 3 grey literature) twelve (57%) studies cited the work of Graham et al. [28], six studies (29%) referenced or cited the definition by Choo [2], and seven studies (33%) cited the work of Rowel et al. [29]. Graham et al. [28] and Rowel et al. [29] also cited Choo (2001) [2] as influential. (see supplementary file

6)

1  
2  
3 The thematic analysis of definition/description-related data yielded several key themes:  
4 instrument of discovery, forward-looking, knowledge synthesis, and decision-making (see codes  
5 and themes in supplementary file 7). Most of the studies (81%) classified ES as a distinct entity  
6 or mechanism (e.g., “a tool”, “a review”, “a method”) while others described the action or  
7 process of environmental scanning. [65,99,110,112,114] Nearly three quarters (71%) of the  
8 studies used language (e.g., “raise awareness of issues”, “develop insight”, “to identify emerging  
9 issues”) that suggested the acquisition of new knowledge was a function of an ES. Most of the  
10 studies (71%) used ES descriptors that were future-oriented (e.g., “may inform future planning”,  
11 “to enable strategic action”, “opportunities for improvement”). About half (48%) of the studies  
12 conveyed the importance of an ES in synthesizing information (e.g., “the identification and  
13 synthesis of evidence”, “publicly available information is gathered systematically and is used to  
14 evaluate”, “to identify and collate a large body of information”). Many studies (43%) used terms  
15 within the definition/description-related data that suggested an ES could guide and support  
16 decision-making (e.g., “assist in health decision-making”, “to facilitate with strategic planning  
17 and decision-making”, “analyze information to guide the direction”). Finally, some definitions  
18 made reference to scanning the external environment [2,29,101], one included reference to both  
19 the internal and external environments [114], while others referred to internal and external  
20 sources.[44,65,93]

## 21 ES Terminology

22 Terms to describe an ES varied widely and were applied inconsistently across the literature. The  
23 most common term used was “tool” (43%) [29,44,68,73,93,96,112,119,127] including a “mixed-  
24 methods tool” [73] and a “needs assessment tool”. [119] Other terms used to describe an ES were  
25 “an objective review” [82], “review” [70], or “rapid review” [158]; “method” or “research  
26  
27  
28  
29  
30  
31  
32  
33  
34  
35  
36  
37  
38  
39  
40  
41  
42  
43  
44  
45  
46  
47  
48  
49  
50  
51  
52  
53  
54  
55  
56  
57  
58  
59  
60



1  
2  
3 method” [65,114]; “research approach” [110], “cross-sectional survey” [84]; and “integral  
4  
5 process”. [153] An ES was further described as a systematic [29,114], flexible [73], and  
6  
7 economical [73] approach for collecting information.  
8  
9

### 10 Guiding frameworks or models for ES

11  
12 Of the 96 studies reviewed, 18% were conducted by CADTH researchers using organization-  
13  
14 specific processes for conducting ESs. Of the remaining 79 studies, five studies (6% ) reported  
15  
16 being informed or guided by a specific ES model or framework (four peer-reviewed articles  
17  
18 [29,44,82,99] and one grey literature article.[127]) Of these five studies, two [29,99] were guided  
19  
20 by Choo’s conceptual model [2], one [44] was guided by the Choo [2] and the American Society  
21  
22 of Association Executives [ASAE] frameworks [159], one [127] was guided by the Wilburn et  
23  
24 al. model.[41] The fifth study implemented a “built” environmental scan which assesses the  
25  
26 environmental factors that influence an organization (e.g. programs, policies, and physical  
27  
28 features) using a school-based evaluation model.[82] In addition, two studies[123,153] reported  
29  
30 being guided by scoping review methods. Several reviewed studies included conceptual models  
31  
32 that were not specific to ES but were used to guide analysis and reporting of  
33  
34 results.[75,107,110,127,134,142,153,157,158]  
35  
36  
37  
38  
39  
40

### 41 **Methodological and other observations**

42  
43 In most studies, the ES was the primary methodological approach. However, in 14% of studies,  
44  
45 the ES represented one of multiple methodological approaches used within a study.[69,72,86-  
46  
47 88,90,103,115,127,131,132,155,158] In some studies for example (8%), ESs were conducted in  
48  
49 combination with a systematic review [74,108,131,132,155] or a scoping review. [44,107,127]  
50  
51 Several studies reported the findings of ES component of a study was used to validate  
52  
53 information gathered from other methods used in those same studies such as a scoping review,  
54  
55  
56  
57  
58  
59  
60

1  
2  
3 interviews, focus groups, or surveys.[44,83,86]. In addition, there were inconsistencies in the  
4  
5 interpretation of the terms ‘passive’ data collection.[44,99,118]  
6

7  
8 Finally, several studies emphasized that the ES was useful to engage stakeholders in the  
9  
10 program planning process.[29,41,68,153] For example, Wilburn et al. [41] demonstrated the  
11  
12 central role of engaging stakeholders in developing plans to increase HPV vaccination rates.  
13

### 14 15 **Limitations of the reviewed studies**

16  
17 A discussion of limitations was included in about 65% of the studies. The most common  
18  
19 limitations were those related to the search strategy, sampling, design, data collection methods,  
20  
21 and response rate. Overall, similar limitations were noted across peer-reviewed and grey  
22  
23 literature.  
24

## 25 26 **DISCUSSION**

27  
28 This scoping review provides insight into how ES are conceptualized, designed, and  
29  
30 operationalized in the health services delivery literature, a topic that had not been extensively  
31  
32 examined or well understood. ES were conducted to gather evidence and inform decision-  
33  
34 making on complex policy and health service delivery issues in a range of settings across the  
35  
36 continuum of healthcare services. However, significant conceptual and methodological gaps  
37  
38 were also identified.  
39  
40

41  
42 First, the findings of this review underscore inconsistencies in the terminology used to  
43  
44 describe and define ESs in a health services delivery context. Terminology to define the ES as an  
45  
46 entity varied (e.g., a needs assessment tool, method, review, process), and where a definition or  
47  
48 description was provided, the content and emphasis also varied. Despite lack of clarity of  
49  
50 terminology and/or definition, research using ES has continued. Data from this review indicates  
51  
52  
53  
54  
55  
56  
57  
58  
59  
60

1  
2  
3 the number of published ESs in health services delivery has increased from 6% (2001-2006) to  
4  
5 44% (2016-2019).  
6

7  
8 It is not unusual to find inconsistencies in terminology [160-162], and/or definitions  
9  
10 [161] in widely used methodologies. The provision and use of clear and consistent ES-related  
11  
12 terminology and/or definition may limit uncertainty among researchers when deciding whether  
13  
14 to choose an ES for a research study. It may also improve reader understanding and experience  
15  
16 (160,162], increase confidence and efficiency of researchers in implementing high quality  
17  
18 studies [161,162], improve knowledge translation [161], advance ES as a methodological  
19  
20 approach [29,161], and enhance the strength of ESs to support decision-making on policy and  
21  
22 practice.  
23  
24

25  
26 Among the studies that included an ES definition and/or description the works of three  
27  
28 researchers were most cited [2,28,29], particularly the Choo model [2] which built on previous  
29  
30 frameworks [163,164] and was developed in the business sector. Notably, these works were all  
31  
32 published over a decade ago, signaling a need for new research and further work to develop a  
33  
34 consensus on a formal definition of ES in the context of health services delivery. This conceptual  
35  
36 gap was noted by Rowel et al [29] who stated “The lack of clear definition or methodology for  
37  
38 ES could weaken its efficacy for public health practice if it were confused with other research  
39  
40 tools or processes, such as a comprehensive needs assessment”. p. 533  
41  
42  
43

44  
45 Given this conceptual gap, and based on the analysis of the 96 studies in this scoping  
46  
47 review, discussions with our research team, and previous research and definitions  
48  
49 [2,28,29,41,44,84,114,153,165] a working definition was developed as a preliminary step  
50  
51 towards the potential development of a formal definition of ES within the context of health  
52  
53 services delivery (Box 1). The descriptive characteristics of the ESs identified in this scoping  
54  
55  
56  
57  
58  
59

1  
2  
3 review and the four key themes identified through the thematic analysis (instrument of  
4  
5 discovery; forward looking; knowledge synthesis; and decision-making) underpin the working  
6  
7 definition. This definition is distinct to health service delivery because it provides specifics about  
8  
9 the nature of the information, how it is gathered, and the environments from which information  
10  
11 is gathered. It also states the purpose of ESs.  
12  
13  
14  
15  
16

17 Box 1 Working definition of an environmental scan in the health services delivery context  
18

19  
20  
21 In the health services delivery context, an environmental scan is a type of  
22  
23 inquiry that involves the collection and synthesis of existing information  
24  
25 and/or the pursuit of new evidence to investigate specific policy and health  
26  
27 services delivery issues to inform and optimize decision-making to shape  
28  
29 future response.

30  
31 Drawing information from any source within the internal and/or external  
32  
33 environments of an organization, an ES is often conducted to identify  
34  
35 emerging issues, service gaps and priorities; inform program design,  
36  
37 improve service quality and patient safety, inform future planning, and  
38  
39 identify successful strategies and innovations to inform system  
40  
41 transformation.  
42  
43  
44  
45  
46  
47  
48  
49  
50  
51  
52  
53  
54  
55  
56  
57  
58  
59  
60

40  
41 Second, our findings indicate a notable lack of formal guidance to support healthcare  
42  
43 stakeholders in their attempts to design and conduct ESs within a health services delivery  
44  
45 context. These methodological gaps were noted in several of the studies included in this review  
46  
47 [29,44,112,127] as well as in other literature.[41,43] Studies noted the lack of specific  
48  
49 methodology or guidelines for conducting ES [43,44,112,127]. Inconsistencies in methodology  
50  
51 were also noted when designing this scoping review. In several existing studies, researchers  
52  
53  
54  
55  
56  
57  
58  
59  
60

1  
2  
3 referred to data source as “scanning mode” [10,12,31] while others referred to scanning mode as  
4  
5 a component of a conceptual model.[2,163,166]  
6

7  
8         Researchers at CADTH followed specific organization protocols to conduct ESs that then  
9  
10 provided healthcare decision-makers with evidence to optimize the use of health  
11  
12 technologies.[48] Of the non-CADTH studies reviewed, few referenced a specific ES guiding  
13  
14 framework or model specific to the implementation of an ES.[29,44,82,99,127] Most  
15  
16 frameworks were developed within business or education contexts; two ES studies reported  
17  
18 being guided or informed by scoping review methods.[123,153] Existing models may prove  
19  
20 helpful to guide the development of a conceptual model or framework for ES. For example,  
21  
22 Wilburn et al. (2016) outlined a seven-step process for conducting an ES and maintained the  
23  
24 process could be applied to other health issues and research.[41]  
25  
26

27  
28         Given the lack of methodological guidance for ES within the health services delivery  
29  
30 context, exploring the development of a guiding framework or a more standardized process for  
31  
32 conducting an ES specific to this context could enhance the rigor of these studies and make an  
33  
34 important contribution to future research and practice.  
35  
36

37  
38         Finally, several previous studies [28,41,43] described ES as a useful means to increase  
39  
40 stakeholder engagement. This aligns with the current efforts to engage stakeholders in health  
41  
42 services delivery decision-making and in health research.[167,168] Enhancing the quality of ESs  
43  
44 can be an effective approach to increasing stakeholder engagement to strengthen decision-  
45  
46 making to improve patient safety and quality of care [153].  
47  
48  
49  
50  
51  
52  
53  
54  
55  
56  
57  
58  
59  
60

## Limitations of the scoping review

### Strengths and limitations

This scoping review examined a topic not previously examined and followed an established rigorous method for conducting scoping reviews. A data dictionary was developed to promote consistency in data extraction and researchers met regularly to discuss data extraction and the findings. Data was categorized according to the terminology as presented by the authors in the individual included studies. The limitations placed on the grey literature may have resulted in some relevant studies being missed. Broad search terms were used to mitigate this possible. The included studies were not assessed for methodological quality.

### Future research and directions

The conceptual and methodological gaps identified in this scoping review raise important questions for future research and the advancement of ES within a health services delivery context.

1. Would a consensus definition, consistent terminology, and/or a model or framework provide the necessary guidance to support researchers and to advance the ES as a methodological approach used to support decision-making on policy and practice?
2. What types of guidance would a model or framework provide (e.g., type of information gathered, environments assessed (internal/external), methods, and/or types of sources)?

Our future work will involve a further review of the literature and consultation with experts (e.g. researchers, policy-makers, practitioners, and other stakeholders) to build on and refine the working definition presented in this paper to potentially establish a consensus definition of an “environmental scan” within a health services delivery context. We will also explore the

1  
2  
3 development of a conceptual model or framework that may be of assistance to stakeholders who  
4  
5 design and conduct environmental scans.  
6

7  
8 Finally, the findings from this scoping review showed that in 20% of the studies the  
9  
10 evidence generated from the ES was used to inform policy and practice recommendations on a  
11  
12 range of issues. A potential topic for future research could examine how ESs ultimately informed  
13  
14 decision-making.  
15

16  
17 The scoping review was purposely focused on the studies that specified use of an  
18  
19 “environmental scan” to address a specific health service delivery issue. Further research may  
20  
21 examine other analytic methods or techniques that include or are similar to ES such as those used  
22  
23 in business and strategic planning (e.g SWOT, situational analysis).  
24  
25

## 26 **CONCLUSION**

27  
28 This scoping review provided insights into the characteristics of an ES and how they are  
29  
30 described, conceptualized, designed, and implemented as reported in the peer-reviewed and grey  
31  
32 health services delivery literature. Significant conceptual and methodological gaps were  
33  
34 identified. Consistent terminology and/or definition along with structured methodological  
35  
36 guidance could support stakeholders in their attempts to design and implement ESs while  
37  
38 contributing to the strength of ES to support policy and program development. We presented a  
39  
40 preliminary working definition as a first step in exploring a conceptual definition in future work.  
41  
42  
43

44  
45 Health systems operate in a complex, dynamic environment, responding constantly to  
46  
47 current or emerging issues, and unpredictable events that can impact service quality and  
48  
49 efficiency. Evidence gathered through ESs can support decision-making and assist healthcare  
50  
51 organizations to respond, adapt, and build on potential challenges and opportunities.  
52  
53  
54  
55  
56  
57  
58  
59  
60

1  
2  
3 **Funding.** This study did not receive funding from any agency.  
4

5 **Contributors.** All authors contributed to this research including the preparation and editing of  
6  
7 the manuscript. Team members contributed to the screening and analysis of results (PC, TK,  
8  
9 RHL, DAN, RA, SD, AL). PC developed the initial draft of the manuscript, and after several  
10  
11 iterations with significant input from the research team, all team members (PC, TK, RHL, DAN,  
12  
13 RA, SD, AL, WJM,) approved the final manuscript that was submitted for publishing.  
14  
15

### 16 17 **Competing interests**

18  
19 None declared.  
20  
21  
22

### 23 **Ethics approval**

24  
25 This scoping review did not require ethics review.  
26  
27

### 28 **Data Availability Statement**

29  
30 Most data relevant to this study are included in the article or uploaded as supplemental  
31  
32 information. The study protocol and the data dictionary for the data elements in the scoping  
33  
34 review are available upon request from the corresponding author.  
35  
36  
37  
38  
39

40 **Acknowledgements.** We wish to acknowledge the contributions of the research librarians, LB,  
41  
42 who developed the search strategy in consultation with the research team, and KM who  
43  
44 conducted a peer review of the search strategy. We also thank Kate Thompson for her assistance  
45  
46 in the initial article screening, and Christine Fahim, PhD, Scientist, Li Ka Shing Knowledge  
47  
48 Institute, St. Michael's Hospital, Toronto, Ontario for reviewing our initial draft manuscript and  
49  
50 providing helpful feedback.  
51  
52  
53  
54  
55  
56  
57  
58  
59  
60



## REFERENCES

- 1 Choo CW. The art of scanning the environment. In: Voros J, ed. *Reframing Environmental Scanning: A Reader on the Art of Scanning the Environment*. Monograph series 2003. No. 4. Hawthorn, Australia: Australian Foresight Institute, Swinburne University of Technology 2003: 7–18.
- 2 Choo CW. Environmental scanning as information seeking and organizational learning. *Inf Res* 2001;7:1–26.
- 3 Eastough N. Improving resilience through environmental scanning in Western Australia. In: Boston J, Wanna J, Lipski V, et al. ed. *Future-Proofing the State: Managing Risks, Responding to Crisis and Building Resilience*. Canberra, Australia: Australia National University Press, 2014:135–46.
- 4 Zhang X, Majid S, Foo S. Environmental scanning practices of travel agent companies in Singapore. *Asia Pac J Tour Res* 2013;18:823-48.
- 5 Albright K. Environmental scanning: radar for organizational success. *Inf Manag J* 2004;38:38–45.
- 6 Hough JR, White MA. Scanning actions and environmental dynamism: gathering information for strategic decision making. *Manag Decis* 2004;42:781–9.
- 7 Ahmad AMK. Macro-environment influences on health service strategy in Saudi private sector hospitals: an empirical investigation. *Int Bus Res* 2012;5:49-64.
- 8 Tarver WL, Menachemi N. Environmental market factors associated with electronic health record adoption among cancer hospitals. *Health Care Manage Rev* 2018;43:303-14.
- 9 Layman EJ, Bamberg R. Environmental scanning and the health care manager. *Health Care Manag* 2005;24:200–8.
- 10 Robinson CV, Ahmad F, Simmons JEL. Consolidation and fragmentation in environmental scanning: a review and research agenda. *Long Range Plann* 2020;101997.
- 11 Auster E, Choo CW. Environmental scanning by CEOs in two Canadian industries. *J Am Soc Inf Sci* 1993;44:194–203.
- 12 Daft RL, Sormunen J, Parks D. Chief executive scanning, environmental characteristics, and company performance: an empirical study. *Strateg Manag J* 1988;9:123–39.
- 13 Jogaratnam G. Management style and environmental scanning in the search for business opportunities and challenges. *Int J Hospit Tourism Admin* 2005;6:53–71.
- 14 Costa J. An empirically-based review of the concept of environmental scanning. *Int J Contemp Hosp Manag* 1995;7:4–9.
- 15 Fahey L, King WR. Environmental scanning for corporate planning. *Business Horizons* 1977;20:61–71.
- 16 Raymond L, Julien P-A, Ramangalaby C. Technological scanning by small Canadian manufacturers. *J Small Bus Manag* 2001;39:123–38.
- 17 Jain SC. Environmental scanning in U.S. corporations. *Long Range Plann* 1984;17:117–28.

- 1  
2  
3 18 Pashiardis P. Environmental scanning in educational organizations: uses, approaches,  
4 sources and methodologies. *Int J Educ Manag* 1996;10:5–9.
- 5  
6 19 Longest B. Strategic management and public policy. In: Leatt P, Mapa J, ed. *Government*  
7 *Relations in the Health Care Industry*. Westport, Connecticut: Greenwood Publishing  
8 Group 2003:23-45.
- 9  
10 20 Tofts A, Walshe K. Managing resources. In: Walshe K, Smith J, eds. *Healthcare*  
11 *Management*. 2nd ed. New York: Open University Press, McGraw-Hill Education  
12 2011:452-69.
- 13  
14 21 Wright P. Strategic planning: a collaborative process. *Nurs Manag* 2020;51:40–7.
- 15  
16 22 Duncan RB. Characteristics of organizational environments and perceived environmental  
17 uncertainty. *Adm Sci Q* 1972;17:313–27.
- 18  
19 23 Morgan PI. The environment. In La Monica EL ed: *Management in Health Care-A*  
20 *Theoretical and Experiential Approach*. New York, NY: Palgrave Macmillan 1994:461–  
21 7.
- 22  
23 24 Babalhavaeji F, Farhadpoor MR. Information source characteristics and environmental  
24 scanning by academic library managers. *Inf Res Int Electron J* 2013;18.
- 25  
26 25 Brown S. Strategies Health Care Leaders Use to Implement Strategic Change Initiatives  
27 Successfully. *Walden Diss Dr Stud*, 2020.  
28 <https://scholarworks.waldenu.edu/dissertations/8861> (Accessed Dec 2020).
- 29  
30 26 Pourmohammadi K, Bastani P, Shojaei P, et al. A comprehensive environmental  
31 scanning and strategic analysis of Iranian public hospitals: a prospective approach. *BMC*  
32 *Res Notes* 2020;13:179.
- 33  
34 27 Pulaj E, Pulaj I. The effects of strategic environmental analysis on organizational  
35 performance. *UBT Int Conf Manag Bus Econ* 2015;27:85–92.
- 36  
37 28 Graham P, Evitts T, Thomas-MacLean R. Environmental scans: how useful are they for  
38 primary care research? *Can Fam Physician Med Fam Can* 2008;54:1022–3.
- 39  
40 29 Rowel R, Moore ND, Nowrojee S, et al. The utility of the environmental scan for public  
41 health practice: lessons from an urban program to increase cancer screening. *J Natl Med*  
42 *Assoc* 2005;97:527–34.
- 43  
44 30 Nkongolo-Bakenda J-M. Environmental scanning in globally oriented small businesses:  
45 practices suggested by managers. *J Comp Int Manag* 2003;6:23–57.
- 46  
47 31 Robinson CV, Simmons JEL. Organising environmental scanning: exploring information  
48 source, mode and the impact of firm size. *Long Range Plann* 2018;51:526–39.
- 49  
50 32 Canadian Blood Services. *Keeping the promise: Strategic plan 2019-2024*. Ottawa,  
51 Ontario: Canadian Blood Services, 2019. <https://www.blood.ca/en> (Accessed Feb 2021)
- 52  
53 33 Southern Health-Sante Sud. *Southern Health-Sante Sud strategic health plan 2016-*  
54 *2021*. Southern Health-Sante Sud, Manitoba: Southern Health-Sante Sud, (nd).  
55 [https://www.southernhealth.ca/assets/AnnualReports/c2f9a8e99e/Strategic-Health-Plan-](https://www.southernhealth.ca/assets/AnnualReports/c2f9a8e99e/Strategic-Health-Plan-2016-21.pdf)  
56 *2016-21.pdf*. (Accessed Feb 2021)
- 57  
58  
59  
60

- 1  
2  
3 34 Ontario Ministry of Health and Long Term Care, *Ontario's LHINs. Environmental scan*  
4 *2019-2022 integrated health service plans*. Toronto, Ontario: Ontario Ministry of Health  
5 and Long Term Care, 2018.  
6 [http://www.wwlhin.on.ca/~media/sites/ww/files/goalsandachievements/DATA\\_0611201](http://www.wwlhin.on.ca/~media/sites/ww/files/goalsandachievements/DATA_06112019_IHSP_EVSCAN_FULL.pdf?la=en)  
7 [9\\_IHSP\\_EVSCAN\\_FULL.pdf?la=en](http://www.wwlhin.on.ca/~media/sites/ww/files/goalsandachievements/DATA_06112019_IHSP_EVSCAN_FULL.pdf?la=en). (Accessed Feb 2021)  
8  
9 35 Royal College of Physicians and Surgeons of Canada. *Cutting through the health system*  
10 *information fog: Royal College environmental scan*. Ottawa, Ontario: Royal College of  
11 Physicians and Surgeons of Canada, 2017.  
12 <https://www.royalcollege.ca/rcsite/documents/health-policy/environmental-scan-e.pdf>.  
13 (Accessed Feb 2021)  
14  
15 36 Ontario Hospital Association. *Ontario Hospital Association strategic plan 2018-2021*.  
16 Toronto, Ontario: Ontario Hospital Association, (nd) [www.oha.com/strategicplan](http://www.oha.com/strategicplan).  
17 (Accessed Jan 2021)  
18  
19 37 Stacey D, Carley M, Kohli J, *et al*. Remote symptom support training programs for  
20 oncology nurses in Canada: an environmental scan. *Can Oncol Nurs J Rev Can Soins*  
21 *Infirm En Oncol* 2014;24:78–82.  
22  
23 38 American Institutes for Research. *Environmental scan of patient safety education and*  
24 *training programs*. Washington, DC: Agency for Healthcare Research and Quality, 2013.  
25 [https://www.ahrq.gov/research/findings/final-reports/environmental-scan-](https://www.ahrq.gov/research/findings/final-reports/environmental-scan-programs/index.html)  
26 [programs/index.html](https://www.ahrq.gov/research/findings/final-reports/environmental-scan-programs/index.html). (Accessed Jan 2021)  
27  
28 39 Manafò E, Ontario Fall Prevention Collaborative. *An environmental scan of older adult*  
29 *fall prevention indicators*. Toronto, Ontario: Ontario Fall Prevention Collaborative,  
30 Ontario Neurotrauma Foundation, 2020. [https://onf.org/wp-](https://onf.org/wp-content/uploads/2020/06/OFPCollaborative-Environmental-Scan-Indicators-April-2020-v9.pdf)  
31 [content/uploads/2020/06/OFPCollaborative-Environmental-Scan-Indicators-April-2020-](https://onf.org/wp-content/uploads/2020/06/OFPCollaborative-Environmental-Scan-Indicators-April-2020-v9.pdf)  
32 [v9.pdf](https://onf.org/wp-content/uploads/2020/06/OFPCollaborative-Environmental-Scan-Indicators-April-2020-v9.pdf). (Accessed Feb 2021).  
33  
34 40. Valiani S, Rigal R, Stelfox HT, *et al*. An environmental scan of quality indicators in  
35 critical care. *CMAJ Open* 2017;5:E488–95.  
36  
37 41 Wilburn A, Vanderpool RC, Knight JR. Environmental scanning as a public health tool:  
38 Kentucky's human papillomavirus vaccination project. *Prev Chronic Dis* 2016;13:E109  
39  
40 42 Marton C. Environmental scan on women's health information resources in Ontario,  
41 Canada. *Inf Res* 2001;7.  
42  
43 43 Scobba V. PS1-23- The environmental scan: a valuable community health research tool.  
44 *Clin Med Res* 2010;8:184–5.  
45  
46 44 Naumann DN, Reynolds JN, McColl MA, *et al*. Environmental scan of programs for fetal  
47 alcohol spectrum disorder in Eastern Ontario. *J Dev Disabil* 2013;19:29-49.  
48  
49 45 Charlton P, Doucet S, Azar R, *et al*. The use of the environmental scan in health services  
50 delivery research: a scoping review protocol. *BMJ Open* 2019;9:e029805.  
51  
52 46 Zhang X, Majid S, Foo S. Environmental scanning: an application of information literacy  
53 skills at the workplace. *J Inf Sci* 2010;36:719–32.  
54  
55  
56  
57  
58  
59

- 1  
2  
3 47 Rath D, Shiri A, Cockney C. Environmental scan: a methodological framework to  
4 initiate digital library development for communities in Canada's North. *Aslib Journal of*  
5 *Information Management* 2017;69:76–94.
- 6  
7 48 Canadian Agency for Drugs and Technologies in Health (CADTH). *Environmental scan*  
8 *process*. Ottawa, Ontario: Canadian Agency for Drugs and Technologies in Health  
9 (CADTH), 2015.
- 10  
11  
12 49 Arksey H, O'Malley L. Scoping studies: towards a methodological framework. *Int J Soc*  
13 *Res Methodol* 2005;8:19–32.
- 14  
15 50 Peters MDJ, Godfrey CM, Khalil H, *et al*. Guidance for conducting systematic scoping  
16 reviews. *Int J Evid Based Healthc* 2015;13:141–6.
- 17  
18 51 Peters M, Godfrey C, McInerney P, *et al*. Chapter 11: Scoping Reviews. In: Aromataris  
19 E, Munn Z, ed. *JBIManual for Evidence Synthesis*. JBI 2020.  
20 <https://wiki.jbi.global/display/MANUAL/Downloadable+PDF+-+current+version>.  
21 (Accessed Feb 2021)
- 22  
23 52 Levac D, Colquhoun H, O'Brien KK. Scoping studies: advancing the methodology.  
24 *Implement Sci* 2010;5:69.
- 25  
26 53 Khalil H, Peters M, Godfrey CM, *et al*. An evidence-based approach to scoping reviews.  
27 *Worldviews Evid Based Nurs* 2016;13:118–23.
- 28  
29 54 Tricco AC, Lillie E, Zarin W, *et al*. A scoping review on the conduct and reporting of  
30 scoping reviews. *BMC Med Res Methodol* 2016;16:15.
- 31  
32 55 Aromataris E, Riitano D. Constructing a search strategy and searching for evidence: a  
33 guide to the literature search for a systematic review. *Am J Nurs* 2014;114:49–56.
- 34  
35 56 Tricco AC, Lillie E, Zarin W, *et al*. PRISMA extension for scoping reviews (PRISMA-  
36 SCR): checklist and explanation. *Ann Intern Med* 2018;169:467–73.
- 37  
38 57 Sampson M, McGowan J, Cogo E, *et al*. An evidence-based practice guideline for the  
39 peer review of electronic search strategies. *J Clin Epidemiol* 2009;62:944–52.
- 40  
41 58 McGowan J, Sampson M, Salzwedel DM, *et al*. PRESS peer review of electronic search  
42 strategies: 2015 guideline statement. *J Clin Epidemiol* 2016;75:40–6.
- 43  
44 59 New York Academy of Medicine. *Library*. New York, New York: New York Academy  
45 of Medicine, 2021. <https://www.nyam.org/library/> (Accessed Feb 2021).
- 46  
47 60 Canadian Agency for Drugs and Technologies in Health (CADTH). *Grey Matters: a*  
48 *practical tool for searching health-related grey literature*. Ottawa, Ontario: Canadian  
49 Agency for Drugs and Technology, 2019. [https://www.cadth.ca/resources/finding-](https://www.cadth.ca/resources/finding-evidence/grey-matters)  
50 [evidence/grey-matters](https://www.cadth.ca/resources/finding-evidence/grey-matters) (Accessed Jan 2021).
- 51  
52 61 Moher D, Liberati A, Tetzlaff J, *et al*. Preferred reporting items for systematic reviews  
53 and meta-analyses: the PRISMA statement. *PLoS Med* 2009;6:e1000097.
- 54  
55 62 Daudt HM, van Mossel C, Scott SJ. Enhancing the scoping study methodology: a large,  
56 inter-professional team's experience with Arksey and O'Malley's framework. *BMC Med*  
57 *Res Methodol* 2013;13:48.
- 58  
59  
60

- 1  
2  
3 63 Vaismoradi M, Turunen H, Bondas T. Content analysis and thematic analysis:  
4 Implications for conducting a qualitative descriptive study. *Nurs Health Sci*  
5 2013;15:398–405.  
6  
7 64 Braun V, Clarke V. Using thematic analysis in psychology. *Qual Res Psychol* 2006;3:77–  
8 101.  
9  
10 65 Shahid S, Beckmann KR, Thompson SC. Supporting cancer control for Indigenous  
11 Australians: initiatives and challenges for cancer councils. *Aust Health Rev Publ Aust*  
12 *Hosp Assoc* 2008;32:56–65.  
13  
14 66 Abrahamyan L, Wong J, Pham B, et al. Structure and characteristics of community-based  
15 multidisciplinary wound care teams in Ontario: an environmental scan. *Wound Repair*  
16 *Reg* 2015;23:22–9.  
17  
18 67 Ahmad N, Simanovski V, Hertz S, et al. Oral chemotherapy practices at Ontario cancer  
19 centres. *J Oncol Pharm Pract* 2015;21:249–57.  
20  
21 68 Baezconde-Garbanati L, Lienemann BA, Robles M, et al. Implementation of HPV  
22 vaccination guidelines in a diverse population in Los Angeles: results from an  
23 environmental scan of local HPV resources and needs. *Vaccine* 2017;35:4930–5.  
24  
25 69 Bak K, Gutierrez E, Lockhart E, et al. Use of continuous infusion pumps during radiation  
26 treatment. *J Oncol Pract* 2013;9:107–11.  
27  
28 70 Bakhru RN, Wiebe DJ, McWilliams DJ, et al. An environmental scan for early  
29 mobilization practices in U.S. ICUs. *Crit Care Med* 2015;43:2360–9.  
30  
31 71 Ball GDC, Ambler KA, Chanoine J-P. Pediatric weight management programs in  
32 Canada: where, what and how? *Int J Pediatr Obes* 2011;6:e58-61.  
33  
34 72 Batty KM, McTaggart K. Development of a model for sustainable delivery of outreach  
35 allied health services to remote north-west Queensland, Australia. *International Journal*  
36 *of Rural and Remote Health, Research, Education, Practice and Policy* 2003;3:194.  
37  
38 73 Bednar EM, Walsh MT, Baker E, et al. Creation and implementation of an environmental  
39 scan to assess cancer genetics services at three oncology care settings. *J Genet Couns*  
40 2018;27:1482-1496.  
41  
42 74 Brouwers M, Oliver TK, Crawford J, et al. Cancer diagnostic assessment programs:  
43 standards for the organization of care in Ontario. *Curr Oncol* 2009;16:29–41.  
44  
45 75 Carter N, Valaitis R, Feather J, et al. An environmental scan of health and social system  
46 navigation services in an urban Canadian community. *SAGE Open Nurs*  
47 2017;3:2377960816689566.  
48  
49 76 Cartmell KB, Young-Pierce J, McGue S, et al. Barriers, facilitators, and potential  
50 strategies for increasing HPV vaccination: a statewide assessment to inform action.  
51 *Papillomavirus Res* 2018;5:21–31.  
52  
53 77 Chang F, Paramsothy T, Roche M, et al. Patient, staff, and clinician perspectives on  
54 implementing electronic communications in an interdisciplinary rural family health  
55 practice. *Prim Health Care Res Dev* 2017;18:149–60.  
56  
57  
58  
59

- 1  
2  
3 78 Davies B, Edwards N, Ploeg J, et al. Insights about the process and impact of  
4 implementing nursing guidelines on delivery of care in hospitals and community settings.  
5 *BMC Health Serv Res* 2008;8:29.  
6  
7 79 DeGroff A, Coa K, Morrissey KG, et al. Key considerations in designing a patient  
8 navigation program for colorectal cancer screening. *Health Promot Pract* 2014;15:483–  
9 95.  
10  
11 80 Delparte JJ, Chau BA, Mills S, et al. Spinal cord essentials: The development of an  
12 individualized, handout-based patient and family education initiative for people with  
13 spinal cord injury. *Spinal Cord* 2014;52:400–6.  
14  
15 81 Finnigan-Fox G, Matlock DD, Tate CE, et al. Hospice, she yelped: examining the  
16 quantity and quality of decision support available to patient and families considering  
17 hospice. *J Pain Symptom Manage* 2017;54:916-921.  
18  
19 82 Fong AJ, Jones JM, Faulkner G, et al. Exploring cancer centres for physical activity and  
20 sedentary behaviour support for breast cancer survivors. *Curr Oncol* 2018;25: e365-e372.  
21  
22 83 Frost JR, Cherry RK, Oyeku SO, et al. Improving sickle cell transitions of care through  
23 health information technology. *Am J Prev Med* 2016;51:S17-23.  
24  
25 84 Glurich I, Nycz G, Acharya A. Status update on translation of integrated primary dental-  
26 medical care delivery for management of diabetic patients. *Clin Med Res* 2017;15:21–32.  
27  
28 85 Goldwater JC, Kwon NJ, Nathanson A, et al. Open source electronic health records and  
29 chronic disease management. *J Am Med Inform Assoc* 2014;21:e50–4.  
30  
31 86 Gustafson DL, Goodyear L, Keough F. When the dragon’s awake: a needs assessment of  
32 people injecting drugs in a small urban centre. *Int J Drug Policy* 2008;19:189–94.  
33  
34 87 Hauck Y, Rock D, Jackiewicz T, et al. Healthy babies for mothers with serious mental  
35 illness: a case management framework for mental health clinicians. *Int J Ment Health  
36 Nurs* 2008;17:383–91.  
37  
38 88 Hogan TP, Nazi KM, Luger TM, et al. Technology-assisted patient access to clinical  
39 information: an evaluation framework for blue button. *JMIR Res Protoc* 2014;3:e18.  
40  
41 89 Hogenbirk JC, Brockway PD, Finley J, et al. Framework for Canadian telehealth  
42 guidelines: summary of the environmental scan. *J Telemed Telecare* 2006;12:64-70.  
43  
44 90 Jeon J, White RE, Hunt RG, et al. optimizing the design of preprinted orders for  
45 ambulatory chemotherapy: combining oncology, human factors, and graphic design. *J  
46 Oncol Pract* 2012;8:97–102.  
47  
48 91 Joschko J, Keely E, Grant R, et al. Electronic consultation services worldwide:  
49 environmental scan. *J Med Internet Res* 2018;20:e11112.  
50  
51 92 Kobe CM, Turcotte LM, Sadak KT. A narrative literature review and environmental scan  
52 of self-management education programs for adolescent and young adult survivors of  
53 childhood cancer. *J Canc Educ* 2020;35:731–5.  
54  
55 93 Leiva Portocarrero ME, Garvelink MM, Becerra Perez MM, et al. Decision aids that  
56 support decisions about prenatal testing for down syndrome: an environmental scan.  
57 *BMC Med Inform Decis Mak* 2015;15:76.  
58  
59  
60

- 1  
2  
3 94 Liddy C, Hogel M, Blazkho V, et al. The current state of electronic consultation and  
4 electronic referral systems in Canada: an environmental scan. *Stud Health Technol*  
5 *Inform* 2015;209:75-83.  
6  
7 95 Liddy C, Mill K. An environmental scan of policies in support of chronic disease self-  
8 management in Canada. *Chronic Dis Inj Can* 2014;34:55-63.  
9  
10 96 Luke A, Doucet S, Azar R. Paediatric patient navigation models of care in Canada: An  
11 environmental scan. *Paediatr Child Health* 2018;23:e46-55.  
12  
13 97 Mansell K, Edmunds K, Guirguis L. Pharmacists' scope of practice: supports for  
14 Canadians with diabetes. *Can J Diabetes* 2017;41:558-62.  
15  
16 98 McDonald M, Acri M. Mental health services for maternal depression: a need for system-  
17 level change. *Soc Work Ment Health* 2018;16:630-46.  
18  
19 99 Mew EJ, Ritchie SD, VanderBurgh D, et al. An environmental scan of emergency  
20 response systems and services in remote First Nations communities in Northern Ontario.  
21 *Int J Circumpolar Health* 2017;76:1320208.  
22  
23 100 Mitchell AM, King DK, Kameg B, et al. An environmental scan of the role of nurses in  
24 preventing fetal alcohol spectrum disorders. *Issues Ment Health Nurs* 2018;39:151-8.  
25  
26 101 Moore C, Lee J, Milligan J, et al. Physical activity as medicine among family health  
27 teams: an environmental scan of physical activity services in an interdisciplinary primary  
28 care setting. *Appl Physiol Nutr Metab* 2015;40:302-5.  
29  
30 102 Morton G, Walker-Dilks C, Baldassarre F, et al. Delivery of brachytherapy for cervical  
31 cancer: organisational and technical advice to facilitate high-quality care. *Clin Oncol*  
32 2010;22:605-14.  
33  
34 103 Munce SEP, Laan RV, Levy C, et al. Systems analysis of community and health services  
35 for acquired brain injury in Ontario, Canada. *Brain Inj* 2014;28:1042-51.  
36  
37 104 O'Mahony J, Clark N. Immigrant women and mental health care: findings from an  
38 environmental scan. *Issues Ment Health Nurs* 2018;39:924-34. 1479903  
39  
40 105 Ocampo W, Geransar R, Clayden N, et al. Environmental scan of infection prevention  
41 and control practices for containment of hospital-acquired infectious disease outbreaks in  
42 acute care hospital settings across Canada. *Am J Infect Control* 2017;45:1116-26.  
43  
44 106 Patel J, Salit IE, Berry MJ, et al. Environmental scan of anal cancer screening practices:  
45 worldwide survey results. *Cancer Med* 2014;3:1052-61.  
46  
47 107 Porterfield DS, Hinnant LW, Kane H, et al. Linkages between clinical practices and  
48 community organizations for prevention: a literature review and environmental scan. *Am*  
49 *J Public Health* 2012;42:S163-S171.  
50  
51 108 Poulin P, Chapman K, McGahan L, et al. Preoperative skin antiseptics for preventing  
52 surgical site infections: what to do?/Antiseptiques preoperatoires pour la peau afin de  
53 prevenir les infections du site operatoire: que faire? *ORNAC J* 2014;32:12-29.  
54  
55 109 Reitmanova S, Gustafson DL. Primary mental health care information and services for St.  
56 John's visible minority immigrants: gaps and opportunities. *Issues Ment Health Nurs*  
57 2009;30:615-23.  
58  
59  
60

- 1  
2  
3 110 Richard L, Furler J, Densley K, et al. Equity of access to primary healthcare for  
4 vulnerable populations: the IMPACT international online survey of innovations. *Int J*  
5 *Equity Health* 2016;15:64  
6  
7 111 Rosa Fortin M-M, Brown C, Ball GD, et al. Weight management in Canada: an  
8 environmental scan of health services for adults with obesity. *BMC Health Serv Res*  
9 2014;14:69.  
10  
11 112 Scime NV, Burke SM. Environmental scan of breastfeeding resources in Canadian  
12 NICUs. *JOGNN* 2018;47:202–13.  
13  
14 113 Silva GS, Farrell S, Shandra E, et al. The status of telestroke in the United States: a  
15 survey of currently active stroke telemedicine programs. *Stroke* 2012;43:2078–85.  
16  
17 114 Tark A, Agarwal M, Dick AW, et al. Variations in physician orders for life-sustaining  
18 treatment program across the nation: environmental scan. *J Palliat Med* 2019;22:1032-8.  
19  
20 115 Vandenberg T, Coakley N, Nayler J, et al. A framework for the organization and delivery  
21 of systemic treatment. *Curr Oncol* 2009;16:2-15.  
22  
23 116 Whitton A, Warde P, Sharpe M, et al. Organisational standards for the delivery of  
24 intensity-modulated radiation therapy in Ontario. *Clin Oncol* 2009;21:192–203.  
25  
26 117 Wijesundera HC, Trubiani G, Abrahamyan L, et al. Specialized multi-disciplinary heart  
27 failure clinics in Ontario, Canada: an environmental scan. *BMC Health Serv Res*  
28 2012;12:236.  
29  
30 118 Wittal DM. Bridging the gap from the oncology setting to community care through a  
31 cross-Canada environmental scan. *Can Oncol Nurs J Rev Can Nurs Oncol* 2018;28:38–  
32 45.  
33  
34 119 Wittich W, Höbler F, Jarry J, et al. Recommendations for successful sensory screening in  
35 older adults with dementia in long-term care: a qualitative environmental scan of  
36 Canadian specialists. *BMJ Open* 2018;8:e019451.  
37  
38 120 Wolff JL, Kim VS, Mintz S, et al. An environmental scan of shared access to patient  
39 portals. *JAMIA* 2018;25:408–12.  
40  
41 121 Wurz A, Daeggelmann J, Albinati N, et al. Physical activity programs for children  
42 diagnosed with cancer: an international environmental scan. *Support Care Cancer*  
43 2019;27:1153–62.  
44  
45 122 Yergens D, Fradgley E, Aiyar R, et al. An environmental scan of medical assessment  
46 units in Canada. *Healthc Q* 2014;17:28–33.  
47  
48 123 Archer NP, Fevrier-Thomas U, Lokker C, et al. *Electronic personal health records: an*  
49 *environmental scan*. Hamilton, Ontario: McMaster eBusiness Research Centre,  
50 McMaster University, 2010. <https://macsphere.mcmaster.ca/handle/11375/5345>  
51 (Accessed Jan 2021).  
52  
53 124 Association of Maternal & Child Health Programs. *Environmental scan: how state title v*  
54 *programs are responding to autism spectrum disorder and other developmental*  
55 *disabilities*. Washington, DC: Association of Maternal & Child Health Programs, 2011.  
56  
57  
58  
59  
60



- 1  
2  
3  
4 [http://www.amchp.org/programsandtopics/CYSHCN/resources/Documents/FINAL\\_2011%20Autism%20Environmental%20Scan.pdf](http://www.amchp.org/programsandtopics/CYSHCN/resources/Documents/FINAL_2011%20Autism%20Environmental%20Scan.pdf). (Accessed Jan 2021).
- 5  
6 125 Bandali F. *Breastfeeding guidelines, practices and services in Alberta Health Services-an environmental scan*. Edmonton, Alberta: Alberta Health Services, 2014.
- 7  
8 <https://www.albertahealthservices.ca/assets/info/hp/hcf/if-hp-hcf-bf-envscan.pdf>.
- 9  
10 (Accessed Jan 2021).
- 11 126 Bella M, Cobb E, Rothstein J, et al. *Health supports for consumers with chronic conditions*. Hamilton, New Jersey: The Centre for Health Care Strategies, Inc., 2005.
- 12  
13 <http://www.chcs.org/media/ESMVPFINAL.pdf>. (Accessed Jan 2021).
- 14  
15 127 Blackman N. *Chronic Disease and Injury Prevention Programming for Canada's Indigenous Population* [dissertation]. Walden Dissertation and Doctoral Studies, Walden University, 2018.
- 16  
17  
18 <https://scholarworks.waldenu.edu/cgi/viewcontent.cgi?article=6444&context=dissertations>. (Accessed Feb 2021)
- 19  
20  
21 128 Boonyasai R, Ijagbemi O, Pham J, et al. *Improving the emergency department discharge process: environmental scan report*. Rockville, Maryland: Agency for Healthcare Research and Quality, 2014.
- 22  
23  
24 <https://www.ahrq.gov/sites/default/files/wysiwyg/professionals/systems/hospital/edenvironmentalscan/edenvironmentalscan.pdf>. (Accessed Feb 2021).
- 25  
26  
27 129 Campos C, Manning L. *Improving access project environmental scan report*. Winnipeg, Manitoba: Brandon Regional Health Authority, 2006. <https://ninecircles.ca/wp-content/uploads/2017/04/Environmental-Scan-Final-Report.pdf>. (Accessed Feb 2021).
- 28  
29  
30  
31 130 Cowling T, Dolcine B. *Point-of-care testing*. Ottawa, Ontario: Canadian Agency for Drugs and Technologies in Health (CADTH), 2017.
- 32  
33  
34 [https://www.cadth.ca/sites/default/files/pdf/es0308\\_point\\_of\\_care\\_testing.pdf](https://www.cadth.ca/sites/default/files/pdf/es0308_point_of_care_testing.pdf). (Accessed Feb 2021)
- 35  
36  
37 131 Deshpande A, Khoja S, Lorca J, et al. *Asynchronous telehealth: systematic review of analytic studies and environmental scan of relative initiatives*. Ottawa, Ontario: Canadian Agency for Drugs and Technologies in Health (CADTH), 2008a.
- 38  
39  
40  
41 <https://www.cadth.ca/asynchronous-telehealth-systematic-review-analytic-studies-and-environmental-scan-relevant-0>. (Accessed Feb 2021).
- 42  
43  
44 132 Deshpande A, Khoja S, McKibbon A, et al. *Telehealth for acute stroke management (telestroke): systematic review and environmental scan*. Ottawa, Ontario: Canadian Agency for Drugs and Technologies in Health (CADTH), 2008b.
- 45  
46  
47  
48 [https://www.cadth.ca/sites/default/files/pdf/456\\_Telestroke\\_to\\_e.pdf](https://www.cadth.ca/sites/default/files/pdf/456_Telestroke_to_e.pdf). (Accessed Feb 2021).
- 49  
50  
51 133 Dietitians of Canada. *Dietitians in primary health care: a pan-Canadian environmental scan*. Toronto, Ontario: Dietitians of Canada, 2018.
- 52  
53  
54 [For peer review only - <http://bmjopen.bmj.com/site/about/guidelines.xhtml>](https://www.dietitians.ca/DietitiansOfCanada/media/Documents/Resources/2018-</a></p><p>55<br/>56<br/>57<br/>58<br/>59<br/>60</p></div><div data-bbox=)

- Executive-Summary-Dietitians-in-Primary-Health-Care-A-Pan-Canadian-Environmental-Scan.pdf. (Accessed Feb 2021).
- 134 Forsberg VC, Peters R, Napoles A, et al. *Environmental scan and literature review: factors that influence preventive service utilization among children covered by medicaid and CHIP*. Baltimore, Maryland: The Urban Institute, 2014. <https://www.urban.org/sites/default/files/publication/24716/413236-Factors-that-Influence-Preventive-Service-Utilization-among-Children-Covered-by-Medicaid-and-CHIP.pdf>. (Accessed Feb 2021).
- 135 Garland S. *Health interventions in ambulatory cancer care centres*. Ottawa, Ontario: Canadian Agency for Drugs and Technologies in Health (CADTH), 2015. <https://cadth.ca/health-interventions-ambulatory-cancer-care-centres>. (Accessed Feb 2021).
- 136 Great Plains Quality Innovation Network. *Adverse drug events and medication safety environmental scan overview*. Lincoln, NE: Great Plains Quality Innovation Network, 2014. [https://greatplainsqin.org/wp-content/uploads/2014/10/ade\\_environmental\\_scan\\_final1.pdf](https://greatplainsqin.org/wp-content/uploads/2014/10/ade_environmental_scan_final1.pdf). (Accessed Feb 2021).
- 137 HealthTech Solutions, LLC. *Alaska environmental scan: final report*. State of Alaska, Department of Health and Social Services, 2018. [http://dhss.alaska.gov/HealthyAlaska/Documents/Initiatives/Environmental\\_Scan\\_Report.pdf](http://dhss.alaska.gov/HealthyAlaska/Documents/Initiatives/Environmental_Scan_Report.pdf). (Accessed Feb 2021).
- 138 Hochman M, Bourgoin A, Saluja S, et al. *Environmental scan of primary care-based efforts to reduce readmissions*. Rockville, Maryland: Agency for Healthcare Research and Quality, 2019. <https://www.ahrq.gov/sites/default/files/wysiwyg/patient-safety/primary-care-based-efforts.pdf>. (Accessed Feb 2021).
- 139 Loorand-Stiver L. *Falls prevention strategies in adult outpatient or community-based mental health and/or addiction programs: environmental scan*. Ottawa, Ontario: Canadian Agency for Drugs and Technologies in Health (CADTH), 2012a. [https://www.cadth.ca/sites/default/files/pdf/ES\\_MH\\_Fall\\_Preven\\_Rev\\_e.pdf](https://www.cadth.ca/sites/default/files/pdf/ES_MH_Fall_Preven_Rev_e.pdf). (Accessed Feb 2021).
- 140 Loorand-Stiver L. *Transitioning long-term ventilator-dependent patients out of the intensive care unit — an environmental scan*. Ottawa, Ontario: Canadian Agency for Drugs and Technologies in Health (CADTH), 2012b. [https://www.cadth.ca/sites/default/files/pdf/Chronic\\_Ventilator-es-33\\_e.pdf](https://www.cadth.ca/sites/default/files/pdf/Chronic_Ventilator-es-33_e.pdf). (Accessed Feb 2021).
- 141 Mason J, Ford C. *Feeding and swallowing assessment services for pediatric populations In Canada: service provision, practice models, and assessment tools*. Ottawa, Ontario: Canadian Agency for Drugs and Technologies in Health (CADTH), 2017. [https://www.cadth.ca/sites/default/files/pdf/ES0306\\_Feeding\\_Swallowing\\_Assessment%20Services.pdf](https://www.cadth.ca/sites/default/files/pdf/ES0306_Feeding_Swallowing_Assessment%20Services.pdf). (Accessed Feb 2021).

- 1  
2  
3 142 McGrath DP, Newton DA, Hartling DL, et al. *Advancing the evolution insights into the*  
4 *state of e-mental health services in Canada*. Ottawa, Ontario: Mental Health Commission  
5 of Canada, 2017. [https://www.mentalhealthcommission.ca/sites/default/files/2017-](https://www.mentalhealthcommission.ca/sites/default/files/2017-08/eMH%20Environmental%20Scan_FINAL%20EN.pdf)  
6 [08/eMH%20Environmental%20Scan\\_FINAL%20EN.pdf](https://www.mentalhealthcommission.ca/sites/default/files/2017-08/eMH%20Environmental%20Scan_FINAL%20EN.pdf). (Accessed Feb 2021)  
7  
8 143 Moran GE, Snyder CM, Noftsinger RF, et al. *Implementing medication-assisted*  
9 *treatment for opioid use disorder in rural primary care: environmental scan volume 1*.  
10 Rockville, Maryland: Agency for Healthcare Research and Quality (ARHQ), 2017.  
11 [https://tbhcoe.matrc.org/wp-content/uploads/2019/12/implementing-medication-assisted-](https://tbhcoe.matrc.org/wp-content/uploads/2019/12/implementing-medication-assisted-treatment-opioid-disorder-rural-primary-care-environmental-scan-volume-one-2017.pdf?9d4e56&9d4e56)  
12 [treatment-opioid-disorder-rural-primary-care-environmental-scan-volume-one-](https://tbhcoe.matrc.org/wp-content/uploads/2019/12/implementing-medication-assisted-treatment-opioid-disorder-rural-primary-care-environmental-scan-volume-one-2017.pdf?9d4e56&9d4e56)  
13 [2017.pdf?9d4e56&9d4e56](https://tbhcoe.matrc.org/wp-content/uploads/2019/12/implementing-medication-assisted-treatment-opioid-disorder-rural-primary-care-environmental-scan-volume-one-2017.pdf?9d4e56&9d4e56). (Accessed Feb 2021)  
14  
15 144 Morrison A. *H1N1 and seasonal influenza vaccine practices across Canadian*  
16 *jurisdictions*. Ottawa, Ontario: Canadian Agency for Drugs and Technologies in Health  
17 (CADTH), 2009.  
18 [https://www.cadth.ca/sites/default/files/pdf/ES6\\_H1N1\\_and\\_Seasonal\\_Flu\\_Vaccine\\_Prac-](https://www.cadth.ca/sites/default/files/pdf/ES6_H1N1_and_Seasonal_Flu_Vaccine_Practices_e.pdf)  
19 [tices\\_e.pdf](https://www.cadth.ca/sites/default/files/pdf/ES6_H1N1_and_Seasonal_Flu_Vaccine_Practices_e.pdf). (Accessed Feb 2021).  
20  
21 145 Morrison A, Dowler J. *Newborn screening for disorders and abnormalities in Canada*.  
22 Ottawa, Ontario: Canadian Agency for Drugs and Technologies in Health (CADTH),  
23 2011. [https://cadth.ca/sites/default/files/pdf/Newborn\\_Screening\\_es-26\\_e.pdf](https://cadth.ca/sites/default/files/pdf/Newborn_Screening_es-26_e.pdf). (Accessed  
24 Feb 2021).  
25  
26 146 Murzin K, Furlotte C. *HIV and aging: a 2013 environmental scan of programs and*  
27 *services in Canada – community report*. The National Coordinating Committee on HIV  
28 and Aging, 2015. [http://realizecanada.org/wp-content/uploads/Community-Report-EN-](http://realizecanada.org/wp-content/uploads/Community-Report-EN-Web-Ready-Low-Resolution.pdf)  
29 [Web-Ready-Low-Resolution.pdf](http://realizecanada.org/wp-content/uploads/Community-Report-EN-Web-Ready-Low-Resolution.pdf). (Accessed Feb 2021).  
30  
31 147 Ndegwa S. *Support services for cardiac rehabilitation in Canada*. Ottawa, Ontario:  
32 Canadian Agency for Drugs and Technologies in Health, 2010.  
33 <https://www.cadth.ca/support-services-cardiac-rehabilitation-canada>. (Accessed Feb  
34 2021).  
35  
36 148 Ndegwa S. *Initiatives for healthy aging in Canada*. Ottawa, Ontario: Canadian Agency  
37 for Drugs and Technologies in Health, 2011. [https://www.cadth.ca/initiatives-healthy-](https://www.cadth.ca/initiatives-healthy-aging-canada)  
38 [aging-canada](https://www.cadth.ca/initiatives-healthy-aging-canada). (Accessed Feb 2021).  
39  
40 149 Ndegwa S, Dolcine B, Frey N, et al. *Access to and availability of non-pharmacological*  
41 *treatments for chronic non-cancer pain in Canada: an environmental scan*. Ottawa,  
42 Ontario: Canadian Agency for Drugs and Technologies in Health (CADTH), 2018.  
43 [https://www.cadth.ca/sites/default/files/pdf/es0313\\_access-to-non-pharmacological-](https://www.cadth.ca/sites/default/files/pdf/es0313_access-to-non-pharmacological-treatment-of-pain.pdf)  
44 [treatment-of-pain.pdf](https://www.cadth.ca/sites/default/files/pdf/es0313_access-to-non-pharmacological-treatment-of-pain.pdf). (Accessed Feb 2021).  
45  
46 150 Paccagnan J, Kania-Richmond A, Kelly S. *An environmental scan of programs and*  
47 *education tools for the management of osteoarthritis*. Alberta Health Services 2017.  
48 [https://www.albertahealthservices.ca/assets/about/scn/ahs-scn-bjh-oa-programs-and-](https://www.albertahealthservices.ca/assets/about/scn/ahs-scn-bjh-oa-programs-and-education-enviro-scan-report.pdf)  
49 [education-enviro-scan-report.pdf](https://www.albertahealthservices.ca/assets/about/scn/ahs-scn-bjh-oa-programs-and-education-enviro-scan-report.pdf). (Accessed Feb 2021).  
50  
51  
52  
53  
54  
55  
56  
57  
58  
59  
60

- 1  
2  
3 151 Seal K, Quay T, Campbell K. *Ankyloglossia diagnosis and treatment in Canada: an*  
4 *environmental scan*. Ottawa, Ontario: Canadian Agency for Drugs and Technologies in  
5 Health (CADTH), 2018. [https://www.cadth.ca/ankyloglossia-diagnosis-and-treatment-](https://www.cadth.ca/ankyloglossia-diagnosis-and-treatment-canada-environmental-scan)  
6 [canada-environmental-scan](https://www.cadth.ca/ankyloglossia-diagnosis-and-treatment-canada-environmental-scan). (Accessed Feb 2021).  
7  
8 152 Smith E. *Environmental scan assessing the activities engaged in by health units and*  
9 *community health centres to address access and equity in their program delivery and*  
10 *services*. Toronto, Ontario: Ontario Public Health Association, Access and Equity  
11 Committee, 2001.  
12 <https://opha.on.ca/OPHA/media/Resources/Resource%20Documents/scan.pdf?ext=.pdf>.  
13 (Accessed Feb 2021).  
14  
15 153 Medstar Health Research Institute, Smith K, Baker K, et al. *Guide to improving patient*  
16 *safety in primary care settings by engaging patients and families-environmental scan*  
17 *report*. Rockville, Maryland: Agency for Healthcare Research and Quality (AHRQ),  
18 2017. [https://www.ahrq.gov/sites/default/files/wysiwyg/professionals/quality-patient-](https://www.ahrq.gov/sites/default/files/wysiwyg/professionals/quality-patient-safety/patient-family-engagement/pfepriarycare/envscan-report.pdf)  
19 [safety/patient-family-engagement/pfepriarycare/envscan-report.pdf](https://www.ahrq.gov/sites/default/files/wysiwyg/professionals/quality-patient-safety/patient-family-engagement/pfepriarycare/envscan-report.pdf). (Accessed Feb  
20 2021).  
21  
22 154 Topfer L-A, Spry C. *Detection and diagnosis of sepsis in rural and remote areas of*  
23 *Canada: an environmental scan*. Ottawa, Ontario: Canadian Agency for Drugs and  
24 Technologies in Health (CADTH), 2019.  
25 <https://www.cadth.ca/sites/default/files/pdf/es0327-remote-sepsis.pdf>(Accessed Feb  
26 2021).  
27  
28 155 Tran K, Polisen J, Coyle D, et al. *Home telehealth for chronic disease management*.  
29 Ottawa, Ontario: Canadian Agency for Drugs and Technologies in Health (CADTH),  
30 2008. [https://www.cadth.ca/sites/default/files/pdf/H0475\\_Home\\_Telehealth\\_tr\\_e.pdf](https://www.cadth.ca/sites/default/files/pdf/H0475_Home_Telehealth_tr_e.pdf)  
31 (Accessed Feb 2021).  
32  
33 156 Wells C, Dolcine B, Frey N. *Programs for the treatment of opioid addiction: an*  
34 *environmental scan*. Ottawa, Ontario: Canadian Agency for Drugs and Technologies in  
35 Health (CADTH), 2019. [https://cadth.ca/sites/default/files/es/es0335-programs-for-](https://cadth.ca/sites/default/files/es/es0335-programs-for-treatment-opioid-addiction-in-Canada.pdf)  
36 [treatment-opioid-addiction-in-Canada.pdf](https://cadth.ca/sites/default/files/es/es0335-programs-for-treatment-opioid-addiction-in-Canada.pdf) (Accessed Feb 2021).  
37  
38 157 Young C, Helis E, Williams D. *Internet-delivered cognitive behavioural therapy for*  
39 *major depressive disorder and anxiety disorders: an environmental scan*. Ottawa,  
40 Ontario: Canadian Agency for Drugs and Technologies in Health (CADTH), 2018.  
41 [https://cadth.ca/sites/default/files/pdf/ES0331\\_iCBT\\_for\\_Major\\_Depression\\_and\\_Anxi](https://cadth.ca/sites/default/files/pdf/ES0331_iCBT_for_Major_Depression_and_Anxiety.pdf)  
42 [ty.pdf](https://cadth.ca/sites/default/files/pdf/ES0331_iCBT_for_Major_Depression_and_Anxiety.pdf). (Accessed Feb 2021).  
43  
44 158 Yurick J, Allatt D. *Supportive care framework report*. Alberta Health Services, Cancer  
45 Control Alberta, 2016. [https://www.albertahealthservices.ca/assets/info/hp/cancer/if-hp-](https://www.albertahealthservices.ca/assets/info/hp/cancer/if-hp-cancer-supportive-care-framework-report.pdf)  
46 [cancer-supportive-care-framework-report.pdf](https://www.albertahealthservices.ca/assets/info/hp/cancer/if-hp-cancer-supportive-care-framework-report.pdf). (Accessed Feb 2021).  
47  
48 159 Blanken RL, Liff A. *Facing the future: preparing your association to thrive: emerging*  
49 *trends from the ASAE Foundation's ongoing environmental scan research*. Washington,  
50 DC: American Society of Association Executives, 1999.  
51  
52  
53  
54  
55  
56  
57  
58  
59  
60

- 1  
2  
3 160 Chamberlain-Salaun J, Mills J, Usher K. Terminology used to describe health care teams:  
4 an integrative review of the literature. *J Multidiscip Healthc* 2013;6:65–74.  
5  
6 161 Colquhoun HL, Levac D, O’Brien KK, et al. Scoping reviews: time for clarity in  
7 definition, methods, and reporting. *J Clin Epidemiol* 2014;67:1291–4.  
8  
9 162 Nagendrababu V, Dilokthornsakul P, Jinatongthai P, et al. Glossary for systematic  
10 reviews and meta-analyses. *Int Endod J* 2020;53:232–49.  
11  
12 163 Aguilar FJ. *Scanning the business environment*. New York: Macmillan 1967.  
13  
14 164 Daft RL, Weick KE. Toward a model of organizations as interpretation systems. *Acad*  
15 *Manage Rev* 1984;9:284–95.  
16  
17 165 Hatch TF, Pearson TG. Using environmental scans in educational needs assessment. *J*  
18 *Contin Educ Health Prof* 1998;18:179–84.  
19  
20 166 Ghoshal S. Environmental Scanning in Korean Firms: Organizational Isomorphism in  
21 Action. *J Int Bus* 1988;19:69–86.  
22  
23 167 Bombard Y, Baker GR, Orlando E, et al. Engaging patients to improve quality of care: a  
24 systematic review. *Implement Sci* 2018;13:98.  
25  
26 168 Nygaard A, Halvorsrud L, Linnerud S, et al. The James Lind Alliance process approach:  
27 scoping review. *BMJ Open* 2019;9:e027473.  
28  
29  
30  
31  
32  
33  
34  
35  
36  
37  
38  
39  
40  
41  
42  
43  
44  
45  
46  
47  
48  
49  
50  
51  
52  
53  
54  
55  
56  
57  
58  
59  
60

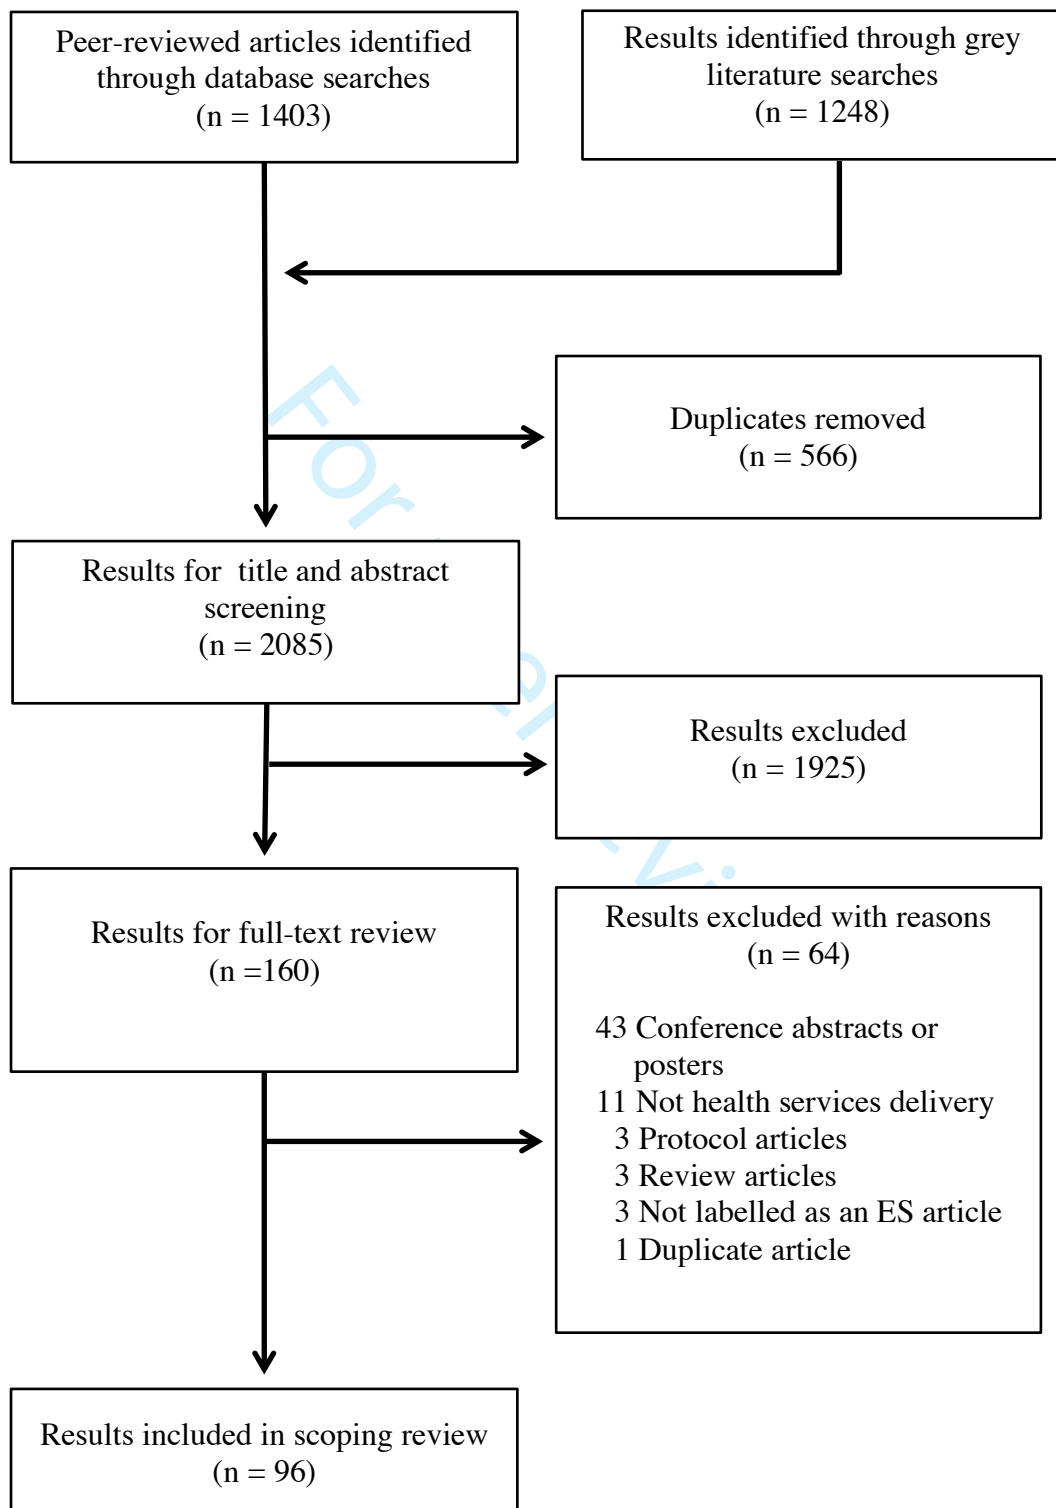

## Supplementary File 1

---

### Search Strategy for Medline

---

- 1 environment\* scan\$4.ti,ab,kf.
- 2 exp "Delivery of Health Care"/
- 3 exp Health Services/ and (administer\* or delegat\* or deliver\* or distribut\* or  
provide or providing or provision).ti,ab.
- 4 ((care or healthcare) adj4 (accessib\* or availab\* or disparit\* or equit\* or equalit\* or  
inaccessib\* or inequalit\*)).ti,ab,kf.
- 5 ((care or healthcare) adj4 (administer\* or delegat\* or deliver\* or distribut\* or  
provide or providing or provision)).ti,ab,kf.
- 6 ((care or healthcare) adj reform\*).ti,ab,kf.
- 7 case management.ti,ab,kf.
- 8 (e health or e mental health or ehealth or m health or mhealth or mobile health or  
telehealth or telemedicine).ti,ab,kf.
- 9 (health care adj4 (accessib\* or availab\* or disparit\* or equit\* or equalit\* or  
inaccessib\* or inequalit\*)).ti,ab,kf.
- 10 (health care adj4 (administer\* or delegat\* or deliver\* or distribut\* or provide or  
providing or provision)).ti,ab,kf.
- 11 (health adj2 reform\*).ti,ab,kf.
- 12 managed care.ti,ab,kf.
- 13 practice pattern\*.ti,ab,kf.

1  
2  
3 14 prescribing pattern\*.ti,ab,kf.  
4  
5

6 15 ((program\* or service\*) adj4 (accessib\* or availab\* or disparit\* or equit\* or equalit\*  
7  
8 or inaccessib\* or inequalit\*)).ti,ab,kf.  
9

10  
11 16 ((program\* or service\*) adj4 (administer\* or delegat\* or deliver\* or distribut\* or  
12  
13 provide or providing or provision)).ti,ab,kf.  
14  
15

16 17 or/2-16  
17

18 18 1 and 17  
19  
20  
21  
22  
23  
24  
25  
26  
27  
28  
29  
30  
31  
32  
33  
34  
35  
36  
37  
38  
39  
40  
41  
42  
43  
44  
45  
46  
47  
48  
49  
50  
51  
52  
53  
54  
55  
56  
57  
58  
59  
60



Supplementary file 2

Selected characteristics of the peer-reviewed academic literature in the scoping review of environmental scans

| <i>Authors/ Year</i>                   | <i>Country</i> | <i>Aim/Purpose of the Study</i>                                                                                                                                                                                                                                                                                                                                                   | <i>Design/Data Collection</i> | <i>Healthcare Setting(s)</i>                            |
|----------------------------------------|----------------|-----------------------------------------------------------------------------------------------------------------------------------------------------------------------------------------------------------------------------------------------------------------------------------------------------------------------------------------------------------------------------------|-------------------------------|---------------------------------------------------------|
| Abrahamyan et al. (2015) (66)          | CA             | To identify all community-based multidisciplinary wound care teams in Ontario and describe their service models.                                                                                                                                                                                                                                                                  | Mixed methods                 | Multiple                                                |
| Ahmad et al. (2015) (67)               | CA             | To develop recommendations and initiatives to improve quality of oral chemotherapy delivery in Ontario.                                                                                                                                                                                                                                                                           | Qualitative                   | Regional Cancer Specialty Clinics/ Centres (provincial) |
| Baezconde-Garbanati et al. (2017) (68) | US             | To assess needs, resources, and understanding attitudes toward HPV vaccination.                                                                                                                                                                                                                                                                                                   | Qualitative                   | Multiple                                                |
| Bak et al. (2013) (69)                 | CA             | To describe available evidence on the effects of radiation on ambulatory infusion pumps used to deliver chemotherapy, heighten awareness of this issue within the clinical community, provide considerations for minimizing possible negative effects on patient care, and encourage the monitoring of infusion devices after exposure to radiation/electromagnetic interference. | Qualitative                   | Regional cancer specialty clinics/ centres (provincial) |

### Selected characteristics of the peer-reviewed academic literature in the scoping review of environmental scans

| <i>Authors/ Year</i>           | <i>Country</i> | <i>Aim/Purpose of the Study</i>                                                                                                                                                                                 | <i>Design/Data Collection</i> | <i>Healthcare Setting(s)</i>                            |
|--------------------------------|----------------|-----------------------------------------------------------------------------------------------------------------------------------------------------------------------------------------------------------------|-------------------------------|---------------------------------------------------------|
| Bakhru et al. (2015) (70)      | US             | To evaluate the current level of diffusion of early mobilization practice and examine environmental factors that may influence its practice in U.S. intensive care units                                        | Quantitative                  | Acute care                                              |
| Ball et al. (2011) (71)        | CA             | To conduct the first national ES of pediatric weight management and reflect on their role in the overall management of pediatric obesity                                                                        | Quantitative                  | Multiple                                                |
| Battye & McTaggart (2003) (72) | AU             | To develop a model of allied health services delivery using the principles of primary healthcare to meet the needs of 11 culturally diverse (indigenous, non-indigenous, mixed) communities in rural Australia. | Mixed methods                 | Primary health care                                     |
| Bednar et al. (2018) (73)      | US             | To inform the design of a quality improvement project to increase rates of adherence to national guidelines for cancer genetic counseling and genetic testing at three unique oncology care settings.           | Mixed methods                 | Acute care                                              |
| Brouwers et al. (2009) (74)    | CA             | To describe how cancer diagnostic services should be organized, structured, and evaluated in Ontario                                                                                                            | Qualitative                   | Regional cancer specialty clinics/ centres (provincial) |

### Selected characteristics of the peer-reviewed academic literature in the scoping review of environmental scans

| <i>Authors/ Year</i>        | <i>Country</i> | <i>Aim/Purpose of the Study</i>                                                                                                                                                                                        | <i>Design/Data Collection</i> | <i>Healthcare Setting(s)</i> |
|-----------------------------|----------------|------------------------------------------------------------------------------------------------------------------------------------------------------------------------------------------------------------------------|-------------------------------|------------------------------|
| Carter et al. (2017) (75)   | CA             | To identify and describe health and social system navigation activities in a large urban Canadian community                                                                                                            | Mixed methods                 | Multiple                     |
| Cartmell et al. (2018) (76) | US             | To identify contextually appropriate strategies for improving HPV vaccination uptake in South Carolina by conducting an ES of the barriers, facilitators, and strategies needed for improving HPV vaccination          | Qualitative                   | Multiple                     |
| Chang et al. (2017) (77)    | CA             | To conduct an environmental scan of a rural primary care clinic to assess the feasibility of implementing an e-communications system between patients and clinic staff.                                                | Mixed methods                 | Primary care                 |
| Davies et al. (2008) (78)   | CA             | To document the process of best practice guideline implementation by topic, to describe facilitators and barriers to implementation and to determine the impact of indicators related to process and patient outcomes. | Mixed Methods                 | Multiple                     |
| DeGroff et al. (2014) (79)  | US             | To describe key considerations in designing a patient navigation intervention model.                                                                                                                                   | Qualitative                   | Multiple                     |
| Delparte et al. (2014) (80) | CA             | To develop a customizable patient and family education resource for people with spinal cord injury                                                                                                                     | Qualitative                   | Rehabilitation               |

### Selected characteristics of the peer-reviewed academic literature in the scoping review of environmental scans

| <i>Authors/ Year</i>            | <i>Country</i> | <i>Aim/Purpose of the Study</i>                                                                                                                                                                                          | <i>Design/Data Collection</i> | <i>Healthcare Setting(s)</i>                            |
|---------------------------------|----------------|--------------------------------------------------------------------------------------------------------------------------------------------------------------------------------------------------------------------------|-------------------------------|---------------------------------------------------------|
| Finnigan-Fox et al. (2017) (81) | US             | To identify available patient decision aids relating information about hospice care and compare that information with the informational needs expressed by real-world health care consumers                              | Qualitative                   | Palliative care                                         |
| Fong et al. (2018) (82)         | CA             | To evaluate cancer centres for physical activity and sedentary behaviour information and infrastructure, and to evaluate the quality of the information accessible to breast cancer survivors in cancer centres          | Mixed methods                 | Regional cancer specialty clinics/ centres (provincial) |
| Frost et al. (2016) (83)        | US             | To better understand the experience of sickle cell disease patients, their caregivers, and providers during care transitions to determine whether and how their needs could be met through health information technology | Qualitative                   | Multiple                                                |
| Glurich et al. (2017) (84)      | US             | To update the current status and progress in advancing establishment of models for integrated oral-dental healthcare delivery for patients with, or at risk for, diabetes.                                               | Qualitative                   | Primary care                                            |

### Selected characteristics of the peer-reviewed academic literature in the scoping review of environmental scans

| <i>Authors/ Year</i>         | <i>Country</i> | <i>Aim/Purpose of the Study</i>                                                                                                                                                                                     | <i>Design/Data Collection</i> | <i>Healthcare Setting(s)</i> |
|------------------------------|----------------|---------------------------------------------------------------------------------------------------------------------------------------------------------------------------------------------------------------------|-------------------------------|------------------------------|
| Goldwater et al. (2014) (85) | US             | To gain a larger understanding of the experience of Community Health Centres in the acquisition, implementation and utilization of open source EHR to achieve meaningful use and to serve their patient populations | Qualitative                   | Multiple                     |
| Gustafson et al. (2008) (86) | CA             | To conduct a needs assessment of injection drug use in St. John's, NL and to identify the barriers to health and health services for people injecting drugs in the city                                             | Mixed methods                 | Multiple                     |
| Hauck et al. (2008) (87)     | AU             | To develop a framework for community mental health clinicians to improve the reproductive health outcomes for women with serious mental illness.                                                                    | Qualitative                   | Multiple                     |
| Hogan et al. (2014) (88)     | US             | To evaluate the effects that technology-assisted access to clinical information may have on stakeholder experiences, processes of care and health outcomes.                                                         | Qualitative                   | Veterans Affairs             |
| Hogenbirk et al. (2006) (89) | CA             | To examine the current status of telehealth in Canada with respect to standards, guidelines, policies or procedures                                                                                                 | Mixed methods                 | Multiple                     |

### Selected characteristics of the peer-reviewed academic literature in the scoping review of environmental scans

| <i>Authors/ Year</i>                  | <i>Country</i> | <i>Aim/Purpose of the Study</i>                                                                                                                                                                         | <i>Design/Data Collection</i> | <i>Healthcare Setting(s)</i>           |
|---------------------------------------|----------------|---------------------------------------------------------------------------------------------------------------------------------------------------------------------------------------------------------|-------------------------------|----------------------------------------|
| Jeon et al. (2012) (90)               | CA             | To establish a set of guidelines for developing ambulatory chemotherapy preprinted orders in Canada.                                                                                                    | Qualitative                   | Ambulatory care                        |
| Joschko et al. (2018) (91)            | CA             | To examine different eConsult services available worldwide and compare the strategies, barriers, and successes of their implementation in different health care contexts                                | Qualitative                   | Multiple                               |
| Kobe et al. (2020) (92)               | US             | To systematically survey and interpret relevant self-management education programs to identify opportunities for their development specific to adolescent and young adult survivors of childhood cancer | Qualitative                   | Primary health care                    |
| Leiva Portocarrero et al. (2015) (93) | CA             | To identify publicly available DAs focusing on prenatal screening/diagnosis for Down syndrome that provide effective support for decision making                                                        | Qualitative                   | Not clear or not specifically reported |
| Liddy et al. (2015) (94)              | CA             | To identify current eConsultation and eReferral systems in Canada and to gain insight into the design and implementation process of existing systems.                                                   | Qualitative                   | Multiple                               |

1  
2  
3  
4 **Selected characteristics of the peer-reviewed academic literature in the scoping review of environmental scans**

5  
6  
7  
8  
9  
10  
11  
12  
13  
14  
15  
16  
17  
18  
19  
20  
21  
22  
23  
24  
25  
26  
27  
28  
29  
30  
31  
32  
33  
34  
35  
36  
37  
38  
39  
40  
41  
42  
43  
44  
45  
46  
47

| <i>Authors/ Year</i>        | <i>Country</i> | <i>Aim/Purpose of the Study</i>                                                                                                                                                                                                    | <i>Design/Data Collection</i> | <i>Healthcare Setting(s)</i>                     |
|-----------------------------|----------------|------------------------------------------------------------------------------------------------------------------------------------------------------------------------------------------------------------------------------------|-------------------------------|--------------------------------------------------|
| Liddy & Mill (2014) (95)    | CA             | To identify existing policies, strategies and frameworks that support self-management initiatives for chronic disease in Canada.                                                                                                   | Qualitative                   | Health administration/Health policy system level |
| Luke et al. (2018) (96)     | CA             | To provide other organizations with useful information when implementing paediatric navigation programs and to inform the implementation of a navigation care centre in New Brunswick for children with complex health conditions. | Qualitative                   | Multiple                                         |
| Mansell et al. (2017) (97)  | CA             | To characterize pharmacists' expanded scope of practice as it relates to providing services to Canadians with diabetes                                                                                                             | Qualitative                   | Multiple                                         |
| McDonald & Acri (2018) (98) | US             | To examine agency-level barriers to treatment among a poverty-impacted sample of women with depressive symptoms, as well as any supports that agencies have implemented to engage consumers into services.                         | Quantitative                  | Multiple                                         |
| Mew et al. (2017) (99)      | CA             | To understand emergency response systems, services, and training in remote Nishnawbe Aski Nation First Nation communities.                                                                                                         | Qualitative                   | Emergency services or response system            |

### Selected characteristics of the peer-reviewed academic literature in the scoping review of environmental scans

| <i>Authors/ Year</i>        | <i>Country</i> | <i>Aim/Purpose of the Study</i>                                                                                                                                                                             | <i>Design/Data Collection</i> | <i>Healthcare Setting(s)</i>                            |
|-----------------------------|----------------|-------------------------------------------------------------------------------------------------------------------------------------------------------------------------------------------------------------|-------------------------------|---------------------------------------------------------|
| Mitchell et al. (2018) (11) | US             | To document the results of an ES of the literature, resources, and policies relevant to nursing professionals and their role in preventing alcohol-exposed pregnancies and fetal alcohol spectrum disorders | Qualitative                   | Multiple                                                |
| Moore et al. (2015) (101)   | CA             | To determine the prevalence and characteristics of physical activity services offered by Family Health Teams in Ontario.                                                                                    | Qualitative                   | Primary care                                            |
| Morton et al. (2010) (102)  | CA             | To provide advice on organisational and technical aspects of the delivery of brachytherapy services in Ontario, Canada.                                                                                     | Qualitative                   | Regional cancer specialty clinics/ centres (provincial) |
| Munce et al. (2014) (103)   | CA             | To conduct a systems analysis on community and health services for individuals with acquired brain injury in the province of Ontario, Canada                                                                | Mixed methods                 | Multiple                                                |
| Naumann et al. (2013) (44)  | CA             | To explore, summarize, and map out current services for fetal alcohol syndrome disorder in order to present a comprehensive review of service accessibility in Eastern Ontario.                             | Qualitative                   | Multiple                                                |



### Selected characteristics of the peer-reviewed academic literature in the scoping review of environmental scans

| <i>Authors/ Year</i>            | <i>Country</i> | <i>Aim/Purpose of the Study</i>                                                                                                                                                                                                                                                  | <i>Design/Data Collection</i> | <i>Healthcare Setting(s)</i>           |
|---------------------------------|----------------|----------------------------------------------------------------------------------------------------------------------------------------------------------------------------------------------------------------------------------------------------------------------------------|-------------------------------|----------------------------------------|
| O'Mahony & Clark (2018) (104)   | CA             | To increase understanding of immigrant women's reproductive mental health care services within rural settings and to inform the implementation of a cross regional research program.                                                                                             | Mixed methods                 | Multiple                               |
| Ocampo et al. (2017) (105)      | CA             | To understand the current practices and perceptions with respect to ward closure for hospital acquired infectious disease outbreaks in acute care hospital settings across Canada.                                                                                               | Mixed methods                 | Acute care                             |
| Patel et al. (2014) (106)       | CA             | To characterize anal cancer screening practices in jurisdictions around the world with the aims of providing clinical and operational guidance for clinicians, describing the current practice and providing information from other jurisdictions for health care policy makers. | Quantitative                  | Not clear or not specifically reported |
| Porterfield et al. (2012) (107) | US             | To develop a framework for interventions that utilize linkages between clinical practices and community organizations for the delivery of preventive services, and to identify and characterize these efforts.                                                                   | Qualitative                   | Multiple                               |

### Selected characteristics of the peer-reviewed academic literature in the scoping review of environmental scans

| <i>Authors/ Year</i>                | <i>Country</i> | <i>Aim/Purpose of the Study</i>                                                                                                                               | <i>Design/Data Collection</i> | <i>Healthcare Setting(s)</i> |
|-------------------------------------|----------------|---------------------------------------------------------------------------------------------------------------------------------------------------------------|-------------------------------|------------------------------|
| Poulin et al. (2014) (108)          | CA             | To determine the current preoperative skin antisepsis in Alberta, reviewed key publications and existing guidelines,                                          | Mixed methods                 | Acute care                   |
| Reitmanova & Gustafson (2009) (109) | CA             | To identify the range of existing mental health care services in St. John's, NL with particular attention to those targeting visible minority immigrants.     | Qualitative                   | Multiple                     |
| Richard et al. (2016) (110)         | AU             | To identify, implement and trial best practice interventions to improve access to PHC for vulnerable populations.                                             | Mixed methods                 | Primary health care          |
| Rosa Fortin et al. (2014) (111)     | CA             | To identify programs for managing obesity in adults and evaluate the degree to which programs adhere to recommendations                                       | Quantitative                  | Multiple                     |
| Rowel et al. (2005) (29)            | US             | To conduct the needs-assessment phase of a project to increase cancer screening among African Americans in Baltimore, MD.                                     | Mixed methods                 | Multiple                     |
| Scime & Burke (2018) (112)          | CA             | To determine, via key informant interviews, the types and frequencies of postnatal breastfeeding resources available to mothers of infants in Canadian NICUs. | Mixed methods                 | Acute care                   |

**Selected characteristics of the peer-reviewed academic literature in the scoping review of environmental scans**

| <i>Authors/ Year</i>           | <i>Country</i> | <i>Aim/Purpose of the Study</i>                                                                                                                                                                                     | <i>Design/Data Collection</i> | <i>Healthcare Setting(s)</i> |
|--------------------------------|----------------|---------------------------------------------------------------------------------------------------------------------------------------------------------------------------------------------------------------------|-------------------------------|------------------------------|
| Shahid et al. (2008) (65)      | AU             | To map activities in service provision in Indigenous cancer control with a view to sharing lessons learned.                                                                                                         | Qualitative                   | Multiple                     |
| Silva et al. (2012) (113)      | US             | To conduct an ES of telemedicine-based stroke programs in the US and to identify success factors and barriers to the development or sustainability of telestroke programs                                           | Mixed methods                 | Multiple                     |
| Tark et al. (2019) (114)       | US             | To identify state variations in Physician Orders for Life-Sustaining Treatment forms and determine if variations are associated with program maturity status.                                                       | Quantitative                  | Multiple                     |
| Vandenberg et al. (2009) (115) | CA             | To provide a practical framework to guide standardized delivery of evidence-based systemic treatment in hospitals outside regional cancer centres, with special consideration for geographically dispersed regions. | Qualitative                   | Ambulatory care              |
| Whitton et al. (2009) (116)    | CA             | To develop the organisational standards for the delivery of intensity-modulated radiation therapy.                                                                                                                  | Qualitative                   | Acute care                   |

### Selected characteristics of the peer-reviewed academic literature in the scoping review of environmental scans

| <i>Authors/ Year</i>             | <i>Country</i> | <i>Aim/Purpose of the Study</i>                                                                                                                                                                                            | <i>Design/Data Collection</i> | <i>Healthcare Setting(s)</i> |
|----------------------------------|----------------|----------------------------------------------------------------------------------------------------------------------------------------------------------------------------------------------------------------------------|-------------------------------|------------------------------|
| Wijeysundera et al. (2012) (117) | CA             | To understand the current availability, intensity, and complexity of services offered in specialized heart failure clinics in Ontario.                                                                                     | Mixed Methods                 | Ambulatory care              |
| Wittal (2018) (118)              | CA             | To gain a broader understanding of survivorship care, highlight any trends, and report disparities in care during the transition from the oncology to the community setting.                                               | Qualitative                   | Multiple                     |
| Wittich et al. (2018) (119)      | CA             | To identify screening tools, technologies and strategies vision and hearing care specialists recommend to front-line healthcare professionals for the screening of older adults in long-term care homes who have dementia. | Qualitative                   | Multiple                     |
| Wolff et al. (2018) (120)        | US             | To determine the availability of information about and features of shared access functionality to the patient portal.                                                                                                      | Qualitative                   | Multiple                     |
| Wurz et al. (2019) (121)         | CA             | To identify physical activity programs for children diagnosed with cancer and summarize program characteristics.                                                                                                           | Qualitative                   | Multiple                     |

1  
2  
3  
4  
5  
6  
7  
8  
9  
10  
11  
12  
13  
14  
15  
16  
17  
18  
19  
20  
21  
22  
23  
24  
25  
26  
27  
28  
29  
30  
31  
32  
33  
34  
35  
36  
37  
38  
39  
40  
41  
42  
43  
44  
45  
46  
47

**Selected characteristics of the peer-reviewed academic literature in the scoping review of environmental scans**

| <i>Authors/ Year</i>        | <i>Country</i> | <i>Aim/Purpose of the Study</i>                                                                                                    | <i>Design/Data Collection</i> | <i>Healthcare Setting(s)</i> |
|-----------------------------|----------------|------------------------------------------------------------------------------------------------------------------------------------|-------------------------------|------------------------------|
| Yergens et al. (2014) (122) | CA             | To better understand the status of medical assessment units in Canada and examine the adoption and characteristics of these units. | Quantitative                  | Acute care                   |

For peer review only

## Supplementary file 3

## Characteristics of the grey literature studies in the scoping review of environmental scans.

| Authors/ Year                                                | Country | Aim/Purpose of the Study                                                                                                                                                                                                   | Design/Data Collection | Healthcare Setting(s)                  |
|--------------------------------------------------------------|---------|----------------------------------------------------------------------------------------------------------------------------------------------------------------------------------------------------------------------------|------------------------|----------------------------------------|
| Archer et al. (2010) (123)                                   | CA      | To describe the design, functionality, implementations, applications, outcomes, and the perceived and real benefits of ePersonal Health Records that have been used thus far, with a particular emphasis on North America. | Qualitative            | Not clear or not specifically reported |
| Association of Maternal & Child Health Programs (2011) (124) | US      | To provide insight into approaches that state Title V programs are taking to address the growing incidence of autism spectrum disorder and other developmental disabilities (ASD/DD)                                       | Qualitative            | Multiple                               |
| Bandali (2014) (125)                                         | CA      | To understand current breastfeeding services within Alberta Health Services acute care and community facilities.                                                                                                           | Mixed methods          | Multiple                               |
| Bella et al. (2005) (126)                                    | US      | To promote the development of new models of care for consumers with multiple chronic conditions who are served by Medicaid or are dually eligible for Medicaid and Medicare.                                               | Mixed methods          | Multiple                               |
| Blackman (2018) (127)                                        | CA      | To compile inventor of existing Chronic Disease and Injury Prevention (CDIP) programming that is culturally appropriate to the indigenous population.                                                                      | Qualitative            | Primary health care                    |

**Characteristics of the grey literature studies in the scoping review of environmental scans.**

| <b>Authors/ Year</b>                            | <b>Country</b> | <b>Aim/Purpose of the Study</b>                                                                                                                                                                                     | <b>Design/Data Collection</b> | <b>Healthcare Setting(s)</b> |
|-------------------------------------------------|----------------|---------------------------------------------------------------------------------------------------------------------------------------------------------------------------------------------------------------------|-------------------------------|------------------------------|
| Boonyasai et al. (2014) (128)                   | US             | To conduct an environmental scan of the literature on Emergency Department (ED) discharge procedures to describe existing processes, along with their strengths, weaknesses, omissions, barriers, and facilitators. | Qualitative                   | Acute care                   |
| Campos & Manning (2006) (129)                   | CA             | To identify service priorities in Brandon and Winnipeg for immigrants and refugees infected with, affected by, or at risk for HIV.                                                                                  | Qualitative                   | Multiple                     |
| Cowling & Dolcine (2017) (130)                  | CA             | To identify and analyze evidence and information regarding how Point of Care Testing (POCT) is implemented and managed in jurisdictions across Canada                                                               | Mixed methods                 | Multiple                     |
| Deshpande, Khola, Lorca et al. (2008a) (131)    | CA             | To provide a critical evaluation of the available data on the use of clinical applications of asynchronous telehealth.                                                                                              | Qualitative                   | Multiple                     |
| Deshpande, Khola, Mckibbon et al. (2008b) (132) | CA             | To provide a critical evaluation of the available data on the use of telehealth for acute stroke patients                                                                                                           | Qualitative                   | Multiple                     |

**Characteristics of the grey literature studies in the scoping review of environmental scans.**

| <b>Authors/ Year</b>                                 | <b>Country</b> | <b>Aim/Purpose of the Study</b>                                                                                                                                                                                                  | <b>Design/Data Collection</b> | <b>Healthcare Setting(s)</b>           |
|------------------------------------------------------|----------------|----------------------------------------------------------------------------------------------------------------------------------------------------------------------------------------------------------------------------------|-------------------------------|----------------------------------------|
| Dietitians of Canada (2018) (133)                    | CA             | To describe the current dietetic workforce and the role of dietitians as interprofessional health team members in Canadian provinces and territories.                                                                            | Qualitative                   | Primary health care                    |
| Forsberg et al. (2014) (134)                         | US             | To summarize current preventive service utilization patterns and barriers, documented cost and health outcomes associated with prevention, and activities and efforts designed to improve preventive service rates and outcomes. | Qualitative                   | Not clear or not specifically reported |
| Garland (2015) (135)                                 | CA             | To identify and summarize information about independent ambulatory cancer care centres in Canada, including services and interventions provided to cancer patients outside traditional acute care settings.                      | Qualitative                   | Ambulatory care                        |
| Great Plains Quality Innovation Network (2016) (136) | US             | To collect information regarding current status of medication safety efforts to detect and prevent Adverse Drug Events (ADE) within the Great Plains Quality Innovation Network (QIN).                                           | Quantitative                  | Multiple                               |



**Characteristics of the grey literature studies in the scoping review of environmental scans.**

| <b>Authors/ Year</b>               | <b>Country</b> | <b>Aim/Purpose of the Study</b>                                                                                                                                                                                                                                        | <b>Design/Data Collection</b> | <b>Healthcare Setting(s)</b> |
|------------------------------------|----------------|------------------------------------------------------------------------------------------------------------------------------------------------------------------------------------------------------------------------------------------------------------------------|-------------------------------|------------------------------|
| Health Tech Solutions (2018) (137) | US             | To develop an accurate “As-Is” understanding of the Health Information Technology (HIT) landscape within the State of Alaska.                                                                                                                                          | Quantitative                  | Multiple                     |
| Hochman et al. (2017) (138)        | US             | To examine what is currently known about reducing readmissions from the primary care perspective by analyzing the findings of 42 peer-reviewed articles and 30 items from the gray literature.                                                                         | Qualitative                   | Primary care                 |
| Loorand-Stiver (2012a) (139)       | CA             | To provide an overview of existing falls prevention strategies targeting adults (18 years and older) in outpatient or community-based mental health and/or addiction programs in Canada.                                                                               | Qualitative                   | Multiple                     |
| Loorand-Stiver (2012b) (140)       | CA             | To gather information from long-term ventilation (LTV) programs in British Columbia, Alberta, Manitoba, Ontario, and Newfoundland and Labrador regarding the transitioning of medically stable LTVD patients out of critical care units into alternate levels of care. | Qualitative                   | Acute care                   |

**Characteristics of the grey literature studies in the scoping review of environmental scans.**

| <b>Authors/ Year</b>                                  | <b>Country</b> | <b>Aim/Purpose of the Study</b>                                                                                                                                                                                                                                                                                                                                                                                               | <b>Design/Data Collection</b> | <b>Healthcare Setting(s)</b> |
|-------------------------------------------------------|----------------|-------------------------------------------------------------------------------------------------------------------------------------------------------------------------------------------------------------------------------------------------------------------------------------------------------------------------------------------------------------------------------------------------------------------------------|-------------------------------|------------------------------|
| Mason & Ford (2017) (141)                             | CA             | To Identify and summarize information regarding the feeding and swallowing assessment services provided to pediatric populations in Canada.                                                                                                                                                                                                                                                                                   | Mixed methods                 | Multiple                     |
| McGrath et al. (2017) (142)                           | CA             | To explore how e-mental health is integrated within health systems and/or health policy nationwide.                                                                                                                                                                                                                                                                                                                           | Qualitative                   | Multiple                     |
| MedStar Health Research Institute et al. (2017) (153) | US             | To identify: 1) studies on methods to engage patients and families in their care in primary care settings and the impact of these methods on patient safety; 2) existing interventions and associated tools to improve safety; 3) gaps between existing tools and those that need to be developed; 4) examples of primary care practices that have engaged patients and families in care with improvements in patient safety. | Mixed methods                 | Multiple                     |
| Moran et al. (2017) (143)                             | US             | To review on implementation of medication-assisted treatment (MAT) for opioid use disorder (OUD) in rural primary care settings.                                                                                                                                                                                                                                                                                              | Qualitative                   | Primary care                 |

**Characteristics of the grey literature studies in the scoping review of environmental scans.**

| <b>Authors/ Year</b>           | <b>Country</b> | <b>Aim/Purpose of the Study</b>                                                                                                                                           | <b>Design/Data Collection</b> | <b>Healthcare Setting(s)</b>           |
|--------------------------------|----------------|---------------------------------------------------------------------------------------------------------------------------------------------------------------------------|-------------------------------|----------------------------------------|
| Morrison (2009) (144)          | CA             | To provide information regarding the seasonal and H1N1 vaccination programs currently offered in Canadian jurisdictions.                                                  | Qualitative                   | Not clear or not specifically reported |
| Morrison & Dowler (2011) (145) | CA             | To provide a general overview of newborn screening in Canada, including resources used and the retention period for samples.                                              | Qualitative                   | Multiple                               |
| Murzin & Furlotte (2013) (146) | CA             | To outline the results of a national survey of programs and services which address the needs of older people living with HIV (PLWHIV) in Canada.                          | Mixed methods                 | Multiple                               |
| Ndegwa (2010) (147)            | CA             | To provide information regarding support services provided by cardiac rehabilitation programs across Canada.                                                              | Qualitative                   | Rehabilitation                         |
| Ndegwa (2011) (148)            | CA             | To provide a general overview of regional health authority and other local level frameworks, initiatives, programs, and/or strategies developed to support healthy aging. | Qualitative                   | Multiple                               |

### Characteristics of the grey literature studies in the scoping review of environmental scans.

| Authors/ Year                | Country | Aim/Purpose of the Study                                                                                                                                                                                                                                                                                   | Design/Data Collection | Healthcare Setting(s) |
|------------------------------|---------|------------------------------------------------------------------------------------------------------------------------------------------------------------------------------------------------------------------------------------------------------------------------------------------------------------|------------------------|-----------------------|
| Ndegwa et al. (2018) (149)   | CA      | To provide information about available services, factors affecting access, and funding practices related to nonpharmacological therapies for chronic non-cancer pain in Canada.                                                                                                                            | Mixed methods          | Multiple              |
| Paccagnan et al (2017) (150) | CA      | To inform further development and population of the Bone and Joint Health Strategic Clinical Network (BJNSCN) Model of Care for Osteoarthritis Management (OA Model) by identifying programs and education tools in Alberta, Canada, and internationally for the management of hip and/or knee OA symptoms | Mixed methods          | Multiple              |
| Seal et al. (2018) (151)     | CA      | To gather jurisdictional perspectives on ankyloglossia diagnosis and treatment in Canada.                                                                                                                                                                                                                  | Mixed methods          | Multiple              |
| Smith (2001) (152)           | CA      | To examine resources and policies relating to access and equity in all Health Units and Community Health Centers in Ontario                                                                                                                                                                                | Quantitative           | Primary health care   |
| Topfer & Spry (2019) (154)   | CA      | To understand current resources and practices for sepsis detection in rural and remote settings.                                                                                                                                                                                                           | Mixed methods          | Multiple              |

**Characteristics of the grey literature studies in the scoping review of environmental scans.**

| <b>Authors/ Year</b>      | <b>Country</b> | <b>Aim/Purpose of the Study</b>                                                                                                                                                                                                                                                                                                                                                                  | <b>Design/Data Collection</b> | <b>Healthcare Setting(s)</b> |
|---------------------------|----------------|--------------------------------------------------------------------------------------------------------------------------------------------------------------------------------------------------------------------------------------------------------------------------------------------------------------------------------------------------------------------------------------------------|-------------------------------|------------------------------|
| Tran et al. (2008) (155)  | CA             | To evaluate the clinical benefit and to review the cost effectiveness of home telehealth versus usual care or no care for the management of diabetes, heart failure, and chronic obstructive pulmonary disease (COPD).                                                                                                                                                                           | Qualitative                   | Multiple                     |
| Wells et al. (2019) (156) | CA             | To gain direct stakeholder perspectives on the current context surrounding opioid addiction programs (including both opioid OADs and other non-pharmacological programming) and care setting transitions.                                                                                                                                                                                        | Mixed methods                 | Multiple                     |
| Young et al. (2018) (157) | CA             | To identify existing or developing internet-delivered Cognitive Behaviour Therapy (iCBT) programs for treating patients with major depressive disorder (MDD) and anxiety disorders, to describe the relevant facilitators and barriers to implementation of these programs, and to explore the range of strategies that have been used to establish iCBT programs across Canadian jurisdictions. | Quantitative                  | Multiple                     |

**Characteristics of the grey literature studies in the scoping review of environmental scans.**

| <b>Authors/ Year</b>         | <b>Country</b> | <b>Aim/Purpose of the Study</b>                                                                                                            | <b>Design/Data Collection</b> | <b>Healthcare Setting(s)</b> |
|------------------------------|----------------|--------------------------------------------------------------------------------------------------------------------------------------------|-------------------------------|------------------------------|
| Yurick & Allatt (2016) (158) | CA             | To understand current state, functions, and components of comprehensive cancer-related supportive care in Canada, USA, UK, and New Zealand | Mixed methods                 | Multiple                     |

Supplementary file 4

Environmental scan methods, data sources, and scanning mode characteristics studies from the peer-reviewed academic databases\*

| Authors/<br>Year                     | Data Collection Methods |        |                                            |             |                        |       | Data Sources     |                          |                          |                   |                     |       | Data Source Mode  |                     |                   |                     | Scanning Mode                                 |                                    |
|--------------------------------------|-------------------------|--------|--------------------------------------------|-------------|------------------------|-------|------------------|--------------------------|--------------------------|-------------------|---------------------|-------|-------------------|---------------------|-------------------|---------------------|-----------------------------------------------|------------------------------------|
|                                      | Literature review       | Survey | Key informant / semi-structured interviews | Focus group | Other personal contact | Other | Personal sources | Administrative databases | Reports or internal docs | Academic database | Internet web search | Other | Internal personal | Internal impersonal | External personal | External impersonal | Conditioned viewing - Passive data collection | Searching - Active data collection |
| Abrahamyan et al. 2015 (66)          |                         | X      |                                            |             | X                      | X     | X                |                          |                          |                   |                     | X     |                   |                     |                   |                     |                                               | X                                  |
| Ahmad et al. 2015 (67)               |                         |        | X                                          |             | X                      |       | X                |                          |                          |                   |                     | X     |                   |                     |                   |                     |                                               | X                                  |
| Baezconde-Garbanati et al. 2017 (68) | X                       |        | X                                          |             | X                      |       | X                |                          | X                        |                   |                     | X     |                   | X                   | X                 | X                   | X                                             | X                                  |
| Bak et al. 2013 (69)                 | X                       |        |                                            |             |                        |       |                  |                          |                          | X                 |                     |       |                   |                     | X                 | X                   |                                               |                                    |
| Bakhru et al. 2015 (70)              |                         | X      |                                            |             |                        |       | X                |                          |                          |                   |                     |       |                   | X                   |                   |                     |                                               | X                                  |
| Ball et al. 2011 (71)                |                         | X      |                                            |             | X                      | X     | X                |                          |                          |                   |                     |       |                   | X                   |                   |                     |                                               | X                                  |

| Authors/<br>Year          | Data Collection Methods |        |                                            |             |                        |       | Data Sources     |                          |                          |                   |                     |       | Data Source Mode  |                     |                   |                     | Scanning Mode                                 |                                    |
|---------------------------|-------------------------|--------|--------------------------------------------|-------------|------------------------|-------|------------------|--------------------------|--------------------------|-------------------|---------------------|-------|-------------------|---------------------|-------------------|---------------------|-----------------------------------------------|------------------------------------|
|                           | Literature review       | Survey | Key informant / semi-structured interviews | Focus group | Other personal contact | Other | Personal sources | Administrative databases | Reports or internal docs | Academic database | Internet web search | Other | Internal personal | Internal impersonal | External personal | External impersonal | Conditioned viewing - Passive data collection | Searching - Active data collection |
| Battye et al. 2003 (72)   |                         |        | X                                          | X           | X                      | X     | X                | X                        | X                        |                   |                     | X     | X                 | X                   | X                 |                     | X                                             | X                                  |
| Bednar et al. 2018 (73)   | X                       | X      | X                                          |             | X                      |       | X                |                          | X                        | X                 | X                   |       | X                 | X                   | X                 | X                   | X                                             | X                                  |
| Brouwers et al. 2009 (74) | X                       |        | X                                          |             |                        |       | X                |                          |                          | X                 |                     | X     |                   | X                   | X                 | X                   | X                                             | X                                  |
| Carter et al. 2017 (75)   |                         | X      |                                            |             |                        |       | X                |                          |                          |                   |                     |       |                   | X                   |                   |                     |                                               | X                                  |
| Cartmell et al. 2018 (76) |                         | X      | X                                          |             | X                      |       | X                |                          |                          |                   |                     | X     |                   | X                   |                   |                     |                                               | X                                  |
| Chang et al. 2017 (77)    |                         | X      | X                                          |             |                        |       | X                |                          |                          |                   |                     | X     |                   | X                   |                   |                     |                                               | X                                  |
| Davies et al. 2008 (78)   |                         |        |                                            |             | X                      | X     | X                |                          | X                        |                   |                     | X     | X                 |                     |                   |                     |                                               | X                                  |
| DeGroff et al. 2014 (79)  | X                       |        | X                                          |             |                        |       | X                |                          | X                        | X                 | X                   |       |                   | X                   | X                 | X                   | X                                             | X                                  |
| Delparte et al. 2014 (80) | X                       |        |                                            |             |                        |       |                  |                          | X                        | X                 | X                   |       | X                 |                     | X                 | X                   |                                               |                                    |



1  
2  
3  
4  
5  
6  
7  
8  
9  
10  
11  
12  
13  
14  
15  
16  
17  
18  
19  
20  
21  
22  
23  
24  
25  
26  
27  
28  
29  
30  
31  
32  
33  
34  
35  
36  
37  
38  
39  
40  
41  
42  
43  
44  
45  
46  
47

| Authors/<br>Year              | Data Collection Methods |        |                                            |             |                        |       | Data Sources     |                          |                          |                   |                     |       | Data Source Mode  |                     |                   |                     | Scanning Mode                                 |                                    |
|-------------------------------|-------------------------|--------|--------------------------------------------|-------------|------------------------|-------|------------------|--------------------------|--------------------------|-------------------|---------------------|-------|-------------------|---------------------|-------------------|---------------------|-----------------------------------------------|------------------------------------|
|                               | Literature review       | Survey | Key informant / semi-structured interviews | Focus group | Other personal contact | Other | Personal sources | Administrative databases | Reports or internal docs | Academic database | Internet web search | Other | Internal personal | Internal impersonal | External personal | External impersonal | Conditioned viewing - Passive data collection | Searching - Active data collection |
| Finnigan-Fox et al. 2017 (81) | X                       |        |                                            |             | X                      |       | X                |                          |                          | X                 | X                   |       | X                 |                     | X                 | X                   | X                                             | X                                  |
| Fong et al. 2018 (82)         | X                       |        |                                            |             |                        | X     |                  |                          |                          |                   |                     | X     |                   | X                   |                   |                     | X                                             | X                                  |
| Frost et al. 2016 (83)        | X                       |        |                                            |             |                        |       |                  |                          | X                        | X                 |                     |       |                   |                     |                   | X                   | X                                             |                                    |
| Glurich et al. 2017 (84)      | X                       |        |                                            |             |                        |       |                  |                          | X                        | X                 | X                   | X     |                   |                     |                   | X                   | X                                             |                                    |
| Goldwater et al. 2014 (85)    | X                       |        | X                                          |             |                        | X     | X                |                          | X                        | X                 | X                   | X     |                   |                     | X                 | X                   | X                                             | X                                  |
| Gustafson et al. 2008 (86)    | **<br>NSI               | -      | -                                          | -           | -                      | -     | -                | -                        | -                        | -                 | -                   | -     | -                 | -                   | -                 | -                   | -                                             | -                                  |
| Hauck et al. 2008 (87)        | -<br>NSI                | -      | -                                          | -           | -                      | -     | -                | -                        | -                        | -                 | -                   | -     | -                 | -                   | -                 | -                   | -                                             | -                                  |
| Hogan et al. 2014 (88)        | X                       |        |                                            |             |                        |       |                  |                          |                          | X                 | X                   |       |                   |                     |                   | X                   | X                                             |                                    |

| Authors/<br>Year                    | Data Collection Methods |        |                                            |             |                        |       | Data Sources     |                          |                          |                   |                     |       | Data Source Mode  |                     |                   |                     | Scanning Mode                                 |                                    |
|-------------------------------------|-------------------------|--------|--------------------------------------------|-------------|------------------------|-------|------------------|--------------------------|--------------------------|-------------------|---------------------|-------|-------------------|---------------------|-------------------|---------------------|-----------------------------------------------|------------------------------------|
|                                     | Literature review       | Survey | Key informant / semi-structured interviews | Focus group | Other personal contact | Other | Personal sources | Administrative databases | Reports or internal docs | Academic database | Internet web search | Other | Internal personal | Internal impersonal | External personal | External impersonal | Conditioned viewing - Passive data collection | Searching - Active data collection |
| Hogenbirk et al. 2006 (89)          | X                       | X      | X                                          |             |                        |       | X                |                          |                          | X                 |                     |       |                   | X                   | X                 | X                   | X                                             |                                    |
| Jeon et al. 2012 (90)               | X                       |        |                                            |             |                        |       |                  |                          |                          | X                 |                     |       |                   |                     | X                 | X                   |                                               |                                    |
| Joschko et al. 2018 (91)            | X                       |        | X                                          |             |                        |       | X                |                          | X                        | X                 |                     |       |                   | X                   | X                 | X                   | X                                             |                                    |
| Kobe et al. 2019 (92)               | X                       |        |                                            |             |                        |       |                  |                          | NSI                      | NSI               |                     |       |                   |                     | X                 | X                   |                                               |                                    |
| Leiva Portocarrero et al. 2015 (93) | X                       |        |                                            |             | X                      | X     | X                |                          |                          | X                 | X                   |       |                   | X                   | X                 | X                   | X                                             |                                    |
| Liddy et al. 2015 (94)              | X                       |        | X                                          |             |                        |       | X                |                          | X                        | X                 |                     |       |                   | X                   | X                 | X                   | X                                             |                                    |
| Liddy & Mill, 2014 (95)             | X                       |        | X                                          |             |                        |       | X                |                          |                          | X                 |                     |       |                   | X                   | X                 | X                   | X                                             |                                    |
| Luke et al. 2018 (96)               | X                       |        | X                                          |             |                        |       | X                |                          | X                        | X                 |                     |       |                   | X                   | X                 | X                   | X                                             |                                    |

| Authors/<br>Year            | Data Collection Methods |        |                                            |             |                        |       | Data Sources     |                          |                          |                   |                     |       | Data Source Mode  |                     |                   |                     | Scanning Mode                                 |                                    |
|-----------------------------|-------------------------|--------|--------------------------------------------|-------------|------------------------|-------|------------------|--------------------------|--------------------------|-------------------|---------------------|-------|-------------------|---------------------|-------------------|---------------------|-----------------------------------------------|------------------------------------|
|                             | Literature review       | Survey | Key informant / semi-structured interviews | Focus group | Other personal contact | Other | Personal sources | Administrative databases | Reports or internal docs | Academic database | Internet web search | Other | Internal personal | Internal impersonal | External personal | External impersonal | Conditioned viewing - Passive data collection | Searching - Active data collection |
| Mansell et al. 2017 (97)    | X                       |        | X                                          |             |                        |       | X                |                          |                          | X                 |                     |       |                   | X                   | X                 | X                   | X                                             |                                    |
| McDonald & Aciri, 2018 (98) | X                       | X      |                                            |             |                        |       | X                |                          |                          | X                 |                     |       |                   | X                   | X                 | X                   | X                                             |                                    |
| Mew et al. 2017 (99)        | X                       |        | X                                          |             | X                      |       | X                |                          | X                        | X                 |                     | X     | X                 | X                   | X                 | X                   | X                                             |                                    |
| Mitchell et al. 2017 (100)  | X                       |        |                                            |             | X                      |       | X                |                          | X                        | X                 | X                   |       |                   | X                   | X                 | X                   |                                               |                                    |
| Moore et al. 2015 (101)     |                         |        | X                                          |             |                        |       | X                |                          |                          |                   |                     | X     |                   |                     |                   |                     | X                                             |                                    |
| Morton et al. 2010 (102)    | X                       |        |                                            |             |                        |       |                  |                          |                          | X                 |                     |       |                   |                     | X                 | X                   |                                               |                                    |
| Munce et al. 2010 (103)     | X                       |        |                                            |             |                        |       |                  |                          | X                        | X                 |                     |       |                   |                     | X                 | X                   |                                               |                                    |
| Naumann et al. 2013 (44)    | X                       |        | X                                          |             | X                      | X     | X                |                          | X                        | X                 | X                   | X     | X                 | X                   | X                 | X                   | X                                             |                                    |

| Authors/<br>Year                  | Data Collection Methods |        |                                            |             |                        |       | Data Sources     |                          |                          |                   |                     |       | Data Source Mode  |                     |                   |                     | Scanning Mode                                 |                                    |
|-----------------------------------|-------------------------|--------|--------------------------------------------|-------------|------------------------|-------|------------------|--------------------------|--------------------------|-------------------|---------------------|-------|-------------------|---------------------|-------------------|---------------------|-----------------------------------------------|------------------------------------|
|                                   | Literature review       | Survey | Key informant / semi-structured interviews | Focus group | Other personal contact | Other | Personal sources | Administrative databases | Reports or internal docs | Academic database | Internet web search | Other | Internal personal | Internal impersonal | External personal | External impersonal | Conditioned viewing - Passive data collection | Searching - Active data collection |
| Ocampo et al. 2017 (105)          |                         | X      |                                            |             |                        |       | X                |                          |                          |                   |                     |       |                   |                     | X                 |                     |                                               | X                                  |
| O'Mahony & Clark, 2018 (104)      | X                       | X      | X                                          |             |                        |       | X                |                          |                          | X                 |                     | X     | X                 |                     | X                 | X                   | X                                             | X                                  |
| Patel et al. 2014 (106)           |                         | X      |                                            |             |                        |       | X                |                          |                          |                   |                     |       |                   |                     | X                 |                     |                                               | X                                  |
| Porterfield et al. 2012 (107)     | X                       |        |                                            |             |                        |       |                  |                          |                          | X                 |                     |       |                   |                     |                   | X                   | X                                             |                                    |
| Poulin et al. 2014 (108)          |                         | X      |                                            |             |                        |       | X                |                          |                          |                   |                     | X     |                   |                     |                   |                     |                                               | X                                  |
| Reitmanova & Gustafson 2009 (109) | X                       |        |                                            |             |                        |       |                  |                          |                          | X                 | X                   |       | X                 |                     | X                 | X                   | X                                             |                                    |
| Richard et al. 2016 (110)         |                         | X      |                                            |             |                        |       | X                |                          |                          |                   |                     |       |                   |                     | X                 |                     |                                               | X                                  |
| Rosa Fortin et al. 2014 (111)     |                         | X      |                                            |             | X                      |       | X                |                          |                          |                   |                     |       |                   |                     | X                 |                     |                                               | X                                  |

| Authors/<br>Year               | Data Collection Methods |        |                                            |             |                        |       | Data Sources     |                          |                          |                   |                     |       | Data Source Mode  |                     |                   |                     | Scanning Mode                                 |                                    |
|--------------------------------|-------------------------|--------|--------------------------------------------|-------------|------------------------|-------|------------------|--------------------------|--------------------------|-------------------|---------------------|-------|-------------------|---------------------|-------------------|---------------------|-----------------------------------------------|------------------------------------|
|                                | Literature review       | Survey | Key informant / semi-structured interviews | Focus group | Other personal contact | Other | Personal sources | Administrative databases | Reports or internal docs | Academic database | Internet web search | Other | Internal personal | Internal impersonal | External personal | External impersonal | Conditioned viewing - Passive data collection | Searching - Active data collection |
| Rowel et al. 2008 (29)         | X                       |        | X                                          | X           | X                      | X     | X                | X                        |                          | X                 | X                   | X     | X                 | X                   | X                 | X                   | X                                             | X                                  |
| Scime & Burke 2018 (112)       |                         |        | X                                          |             |                        |       | X                |                          |                          |                   |                     |       |                   | X                   |                   |                     |                                               | X                                  |
| Shahid et al. 2008 (65)        |                         |        | X                                          |             | X                      |       | X                |                          |                          |                   |                     | X     |                   |                     |                   |                     |                                               | X                                  |
| Silva et al. 2012 (113)        | X                       | X      | X                                          |             | X                      |       | X                |                          |                          | X                 | X                   |       |                   | X                   | X                 | X                   | X                                             | X                                  |
| Tark et al. 2019 (114)         | X                       |        |                                            |             |                        |       |                  |                          |                          | X                 |                     |       |                   |                     | X                 | X                   |                                               |                                    |
| Vandenberg et al. 2009 (115)   | X                       |        |                                            |             |                        |       |                  |                          | X                        | X                 |                     |       | X                 |                     | X                 | X                   |                                               |                                    |
| Whitton e al. 2009 (116)       | X                       |        |                                            |             |                        |       |                  |                          | X                        | X                 |                     |       | X                 |                     | X                 | X                   |                                               |                                    |
| Wijeysundera et al. 2012 (117) |                         |        | X                                          |             | X                      |       | X                |                          |                          |                   |                     | X     |                   |                     |                   |                     |                                               | X                                  |

| Authors/<br>Year          | Methods           |        |                                              |             |                        |       | Data Sources     |                          |                          |                   |                     |       | Data Source Mode  |                     |                   |                     | Scanning Mode                                 |                                    |
|---------------------------|-------------------|--------|----------------------------------------------|-------------|------------------------|-------|------------------|--------------------------|--------------------------|-------------------|---------------------|-------|-------------------|---------------------|-------------------|---------------------|-----------------------------------------------|------------------------------------|
|                           | Literature review | Survey | Key informant / semi - structured interviews | Focus group | Other personal contact | Other | Personal sources | Administrative databases | Reports or internal docs | Academic database | Internet web search | Other | Internal personal | Internal impersonal | External personal | External impersonal | Conditioned viewing - Passive data collection | Searching - Active data collection |
| Wittal 2018 (118)         | X                 |        | X                                            |             |                        |       | X                |                          | X                        | X                 | X                   | X     | X                 | X                   | X                 | X                   | X                                             | X                                  |
| Wittich et al. 2018 (119) |                   |        | X                                            |             |                        |       | X                |                          |                          |                   |                     |       |                   |                     | X                 |                     |                                               | X                                  |
| Wolff et al. 2018 (120)   | X                 |        |                                              |             |                        |       |                  |                          |                          | X                 |                     |       |                   |                     |                   | X                   | X                                             |                                    |
| Wurz et al. 2019 (121)    | X                 |        | X                                            |             | X                      |       | X                |                          |                          | X                 | X                   | X     |                   |                     | X                 | X                   | X                                             | X                                  |
| Yergens et al. 2014 (122) |                   | X      |                                              |             |                        |       | X                |                          |                          |                   |                     | X     |                   |                     | X                 |                     |                                               | X                                  |

\* The data collection methods, data sources, data source mode, and scanning mode refer only to the environmental scanning component of the study. \*\* NSI=Not clear or not specifically reported

Supplementary file 5

Environmental scan methods, data sources, and scanning mode characteristics studies from grey literature\*

| Authors/<br>Year                                                     | Data Collection Methods |        |                                            |             |                        |       | Data Sources     |                          |                          |                   |                     |       | Data Source Mode  |                     |                   |                     | Scanning Mode                                 |                                    |
|----------------------------------------------------------------------|-------------------------|--------|--------------------------------------------|-------------|------------------------|-------|------------------|--------------------------|--------------------------|-------------------|---------------------|-------|-------------------|---------------------|-------------------|---------------------|-----------------------------------------------|------------------------------------|
|                                                                      | Literature review       | Survey | Key informant / semi structured interviews | Focus group | Other personal contact | Other | Personal sources | Administrative databases | Reports or internal docs | Academic database | Internet web search | Other | Internal personal | Internal impersonal | External personal | External impersonal | Conditioned viewing - Passive data collection | Searching - Active data collection |
| Archer et al. 2010 (123)                                             | X                       |        |                                            |             |                        |       |                  |                          | X                        |                   |                     |       |                   |                     | X                 | X                   |                                               |                                    |
| Association of Maternal and Child Health Programs (AMCHP) 2011 (124) |                         |        |                                            |             |                        | X     |                  | X                        |                          |                   |                     |       |                   |                     | X                 | X                   |                                               |                                    |
| Bandali 2014 (125)                                                   | X                       | X      | X                                          |             |                        |       | X                | X                        |                          |                   |                     | X     | X                 |                     |                   | X                   | X                                             |                                    |
| Bella et al. 2005 (126)                                              | X                       | X      | X                                          |             | X                      | X     | X                |                          | X                        | **<br>NSI         | NSI                 | X     | X                 | X                   | X                 | X                   | X                                             |                                    |

| Authors/<br>Year                            | Data Collection Methods |        |                                            |             |                        |       | Data Sources     |                          |                          |                   |                     |       | Data Source Mode  |                     |                   |                     | Scanning<br>Mode                              |                                    |
|---------------------------------------------|-------------------------|--------|--------------------------------------------|-------------|------------------------|-------|------------------|--------------------------|--------------------------|-------------------|---------------------|-------|-------------------|---------------------|-------------------|---------------------|-----------------------------------------------|------------------------------------|
|                                             | Literature review       | Survey | Key informant / semi structured interviews | Focus group | Other personal contact | Other | Personal sources | Administrative databases | Reports or internal docs | Academic database | Internet web search | Other | Internal personal | Internal impersonal | External personal | External impersonal | Conditioned viewing - Passive data collection | Searching - Active data collection |
| Blackman 2018 (127)                         | X                       |        | X                                          |             |                        |       | X                |                          |                          | X                 |                     |       |                   | X                   | X                 | X                   | X                                             |                                    |
| Boonyasai et al. 2014 (128)                 | X                       |        | X                                          |             |                        | X     | X                | X                        | X                        | X                 | X                   |       |                   | X                   | X                 | X                   | X                                             |                                    |
| Campos & Manning 2006 (129)                 | X                       |        | X                                          | X           |                        |       | X                | X                        |                          |                   |                     | X     | X                 | X                   | X                 | X                   | X                                             |                                    |
| Cowling & Dolcine 2017 (130)                | X                       | X      | X                                          |             |                        |       | X                |                          | X                        | X                 |                     |       |                   | X                   | X                 | X                   | X                                             |                                    |
| Deshpande, Khoja, Lorca, et al. 2008a (131) | X                       |        |                                            |             | X                      |       | X                |                          | X                        | X                 |                     |       |                   | X                   | X                 | X                   | X                                             |                                    |



| Authors/<br>Year                                   | Data Collection Methods |        |                                            |             |                        |       | Data Sources     |                          |                          |                   |                     | Data Source Mode |                   |                     |                   | Scanning Mode       |                                               |                                    |
|----------------------------------------------------|-------------------------|--------|--------------------------------------------|-------------|------------------------|-------|------------------|--------------------------|--------------------------|-------------------|---------------------|------------------|-------------------|---------------------|-------------------|---------------------|-----------------------------------------------|------------------------------------|
|                                                    | Literature review       | Survey | Key informant / semi structured interviews | Focus group | Other personal contact | Other | Personal sources | Administrative databases | Reports or internal docs | Academic database | Internet web search | Other            | Internal personal | Internal impersonal | External personal | External impersonal | Conditioned viewing - Passive data collection | Searching - Active data collection |
| Deshpande, Khola, McKibbon et al. 2008b (132)      | X                       |        |                                            |             | X                      |       | X                |                          |                          | X                 | X                   |                  |                   |                     | X                 | X                   | X                                             | X                                  |
| Dietitians of Canada 2018 (133)                    | X                       |        | X                                          |             |                        |       | X                |                          |                          | X                 |                     |                  |                   |                     | X                 | X                   | X                                             | X                                  |
| Forsberg et al. 2014 (134)                         | X                       |        |                                            |             |                        |       |                  |                          |                          | X                 | X                   |                  |                   |                     |                   | X                   | X                                             |                                    |
| Garland 2015 (135)                                 | X                       | X      |                                            |             |                        |       | X                |                          |                          | X                 | X                   |                  |                   |                     | X                 | X                   | X                                             | X                                  |
| Great Plains Quality innovation Network 2016 (136) |                         | X      |                                            |             |                        |       | X                |                          |                          |                   |                     |                  | X                 |                     |                   |                     |                                               | X                                  |

| Authors/<br>Year                 | Data Collection Methods |        |                                            |             |                        |       | Data Sources     |                          |                          |                   |                     |       | Data Source Mode  |                     |                   |                     | Scanning Mode                                 |                                    |
|----------------------------------|-------------------------|--------|--------------------------------------------|-------------|------------------------|-------|------------------|--------------------------|--------------------------|-------------------|---------------------|-------|-------------------|---------------------|-------------------|---------------------|-----------------------------------------------|------------------------------------|
|                                  | Literature review       | Survey | Key informant / semi structured interviews | Focus group | Other personal contact | Other | Personal sources | Administrative databases | Reports or internal docs | Academic database | Internet web search | Other | Internal personal | Internal impersonal | External personal | External impersonal | Conditioned viewing - Passive data collection | Searching - Active data collection |
| Health Tech Solutions 2018 (137) |                         | X      |                                            |             |                        |       | X                |                          |                          |                   |                     | X     |                   | X                   |                   |                     |                                               | X                                  |
| Hochman 2017 (138)               | X                       |        |                                            |             |                        |       |                  |                          | X                        | X                 |                     |       |                   |                     | X                 | X                   |                                               |                                    |
| Loorand-Stiver 2012a (139)       |                         |        | X                                          |             |                        |       | X                |                          |                          |                   |                     |       |                   | X                   |                   |                     |                                               | X                                  |
| Loorand-Stiver 2012b (140)       | X                       |        | X                                          |             |                        |       | X                |                          | NSI                      | NSI               |                     |       |                   | X                   | X                 | X                   | X                                             | X                                  |
| Mason & Ford 2017 (141)          | X                       | X      |                                            |             | X                      |       | X                |                          | X                        | X                 |                     |       |                   | X                   | X                 | X                   | X                                             | X                                  |
| McGrath et al. 2017 (142)        | X                       |        | X                                          |             |                        |       | X                |                          |                          | X                 |                     |       |                   | X                   | X                 | X                   | X                                             | X                                  |

1  
2  
3  
4  
5  
6  
7  
8  
9  
10  
11  
12  
13  
14  
15  
16  
17  
18  
19  
20  
21  
22  
23  
24  
25  
26  
27  
28  
29  
30  
31  
32  
33  
34  
35  
36  
37  
38  
39  
40  
41  
42  
43  
44  
45  
46  
47

| Authors/<br>Year             | Data Collection Methods |        |                                            |             |                        |       | Data Sources     |                          |                          |                   |                     |       | Data Source Mode  |                     |                   |                     | Scanning Mode                                 |                                    |
|------------------------------|-------------------------|--------|--------------------------------------------|-------------|------------------------|-------|------------------|--------------------------|--------------------------|-------------------|---------------------|-------|-------------------|---------------------|-------------------|---------------------|-----------------------------------------------|------------------------------------|
|                              | Literature review       | Survey | Key informant / semi structured interviews | Focus group | Other personal contact | Other | Personal sources | Administrative databases | Reports or internal docs | Academic database | Internet web search | Other | Internal personal | Internal impersonal | External personal | External impersonal | Conditioned viewing - Passive data collection | Searching - Active data collection |
| Medstar et al. 2017 (153)    | X                       | X      | X                                          |             |                        | X     | X                | X                        | X                        | X                 | X                   | X     |                   | X                   | X                 | X                   | X                                             |                                    |
| Moran et al. 2017 (143)      | X                       |        |                                            |             |                        |       |                  |                          | X                        | X                 |                     |       |                   |                     | X                 | X                   |                                               |                                    |
| Morrison 2009 (144)          | X                       |        | X                                          |             |                        |       | X                |                          | NSI                      | NSI               |                     |       |                   | X                   | X                 | X                   | X                                             |                                    |
| Morrison & Dowler 2011 (145) | X                       |        | X                                          |             |                        |       | X                |                          | NSI                      | NSI               |                     |       |                   | X                   | X                 | X                   | X                                             |                                    |
| Murzin & Furlotte 2013 (146) |                         | X      |                                            |             |                        |       | X                |                          |                          |                   |                     | X     |                   | X                   |                   |                     | X                                             |                                    |
| Ndegwa, 2010 (147)           | X                       |        | X                                          |             |                        |       | X                |                          | NSI                      | NSI               |                     |       |                   | X                   | X                 | X                   | X                                             |                                    |
| Ndegwa 2011 (148)            | X                       |        | X                                          |             |                        |       | X                |                          |                          | X                 |                     |       |                   | X                   | X                 | X                   | X                                             |                                    |

| Authors/<br>Year            | Data Collection Methods |        |                                            |             |                  |       | Data Sources     |                          |                          |                   |                     |       | Data Source Mode  |                     |                   |                     | Scanning Mode                                 |                                    |
|-----------------------------|-------------------------|--------|--------------------------------------------|-------------|------------------|-------|------------------|--------------------------|--------------------------|-------------------|---------------------|-------|-------------------|---------------------|-------------------|---------------------|-----------------------------------------------|------------------------------------|
|                             | Literature review       | Survey | Key informant / semi structured interviews | Focus group | Personal contact | Other | Personal sources | Administrative databases | Reports or internal docs | Academic database | Internet web search | Other | Internal personal | Internal impersonal | External personal | External impersonal | Conditioned viewing - Passive data collection | Searching - Active data collection |
| Ndegwa et al. 2018 (149)    | X                       | X      | X                                          |             |                  |       | X                |                          | X                        | X                 |                     |       |                   | X                   | X                 | X                   | X                                             |                                    |
| Paccagnan et al. 2017 (150) | X                       | X      |                                            |             |                  | X     | X                |                          | X                        | X                 |                     | X     | X                 | X                   | X                 | X                   | X                                             |                                    |
| Seal et al 2018 (151)       | X                       | X      | X                                          |             |                  |       | X                |                          | X                        | X                 |                     |       |                   | X                   | X                 | X                   | X                                             |                                    |
| Smith 2001 (152)            |                         | X      |                                            |             |                  |       | X                |                          |                          |                   |                     | X     |                   |                     |                   |                     | X                                             |                                    |
| Topfer & Spry 2019 (154)    | X                       | X      | X                                          |             |                  |       | X                |                          | X                        | X                 |                     |       |                   | X                   | X                 | X                   | X                                             |                                    |
| Tran et al. 2008 (155)      | X                       |        | X                                          |             |                  |       | X                | X                        |                          | X                 |                     |       |                   | X                   | X                 | X                   | X                                             |                                    |
| Wells et al. 2019 (156)     | X                       | X      |                                            |             |                  |       | X                |                          | X                        | X                 |                     |       |                   | X                   | X                 | X                   | X                                             |                                    |

| Authors/<br>Year         | Data Collection Methods |        |                                            |             |                  |       | Data Sources     |                          |                          |                   |                     | Data Source Mode |                   |                     |                   | Scanning Mode       |                                               |                                    |
|--------------------------|-------------------------|--------|--------------------------------------------|-------------|------------------|-------|------------------|--------------------------|--------------------------|-------------------|---------------------|------------------|-------------------|---------------------|-------------------|---------------------|-----------------------------------------------|------------------------------------|
|                          | Literature review       | Survey | Key informant / semi structured interviews | Focus group | Personal contact | Other | Personal sources | Administrative Databases | Reports or internal docs | Academic database | Internet web search | Other            | Internal personal | Internal impersonal | External personal | External impersonal | Conditioned viewing - Passive data collection | Searching - Active data collection |
| Young et al. 2018 (157)  |                         | X      |                                            |             |                  |       | X                |                          |                          |                   |                     |                  |                   |                     | X                 |                     |                                               | X                                  |
| Yurick et al. 2016 (158) | X                       |        | X                                          |             |                  |       | X                |                          |                          | X                 |                     | X                |                   | X                   |                   |                     |                                               | X                                  |

\* The data collection methods, data sources, data source mode, and scanning mode refer only to the environmental scanning component of the study. \*\*NSI = not clear or not specifically reported

1  
2  
3  
4 **Supplementary file 6**

5 **Definitions and descriptions of environmental scan**

6

---

7 **Author** **Definition/Description**

---

8

9

10 Baesconde- “Although environmental scans originated in the business sector, they have  
11 Garbanati et come to be used in public health to collect data that can be used to develop  
12 al., 2017 health programs and interventions tailored to the unique needs of specific  
13 [1] communities [2] Environmental scans can help assess strengths,  
14 weaknesses, challenges, and opportunities for improvement. They may help  
15 to refute or confirm common perceptions within the community. The  
16 methodology for environmental scans vary depending on the needs of the  
17 organization or community. However, they often include multiple sources of  
18 internal and external data (e.g., literature review, surveys, interviews with  
19 key stakeholders, internal documents, focus groups, technology), various  
20 target populations, and program planning [3] Environmental scans can be a  
21 valuable tool to raise awareness of issues, plan for the future, develop  
22 interventions, assist in health decision-making, and provide information for  
23 the development of evidence- based policies” [3] p. 493 1  
24  
25  
26  
27  
28

29 Bakhru et “An environmental scan is defined as a review of current structures,  
30 al., 2015 processes and outcomes of care, and barriers to the new process understood  
31 [4] in the context of the ecosystem (in this case, the ICU)” [4] p. 2361  
32  
33

34

35 Bednar et “An ES is a mixed-methods tool used in business, government, and public  
36 al., 2018 health to collect information, identify risks and opportunities, tailor strategic  
37 [5] plans, or design programs in a flexible, rapid, comprehensive, low-cost  
38 manner” [2,3,6] p. 1483  
39  
40

41 Blackman, “There has been an increasing interest in environmental scans in public  
42 2018 health practice, as they are now recognized as a valuable assessment and  
43 [7] data collection tool by federal funding agencies and other health-related  
44 organizations. [8] Environmental scans originated in the business world as a  
45 tool for retrieving and organizing data to facilitate with strategic planning  
46 and decision-making.[3] Within the arena of public health, environmental  
47 scans have been used to collect, organize, and analyze information to guide  
48 the direction of new public health activity, raise awareness of health  
49 disparities, or initiate a project or funding opportunity [8]... As Rowel et al.  
50 [2] posited, the realities of the 21st century with regards to new technologies  
51 and diversity in sources of information have forced public health to  
52  
53  
54  
55  
56  
57  
58  
59  
60

1  
2  
3  
4 reconsider traditional approaches to knowledge generation. It has been  
5 recognized that in a health environment that experiences challenges such as  
6 scarcity of resources, innovative approaches to public health research and  
7 practice is needed to maximize existing resources, ensure timely responses  
8 to health crises, and build on established knowledge. [2] Environmental  
9 scans incorporate nontraditional methods in searching for evidence that  
10 include exploring the Internet and directly contacting or surveying other  
11 programs, organizations, or experts. [9]

12  
13 An advantage to an environmental scan approach is the allowance for  
14 organizations to account for diverse types of knowledge, which includes  
15 codified from statistics, policy documents, or clinical reviews) and tacit  
16 knowledge (data from interviews or focus groups). [3] There are multiple  
17 strategies for information collection that include, but are not limited to,  
18 focus groups, in-depth interviews, surveys, literature assessments, chart  
19 reviews, personal communication, and policy analyses.[8] The goal of  
20 environmental scans is to use the information attained to design health  
21 programs that meet the needs of the target population. Intrinsicly, they are  
22 designed to help the process of planning for the future by guiding health  
23 organizations and projects, thereby leading to evidence-based solutions for  
24 health care issues [3]... A noted limitation of environmental scans is the  
25 inconsistent approach to conducting them, resulting in ambiguity of the  
26 process. [3,8] pp. 9-11, 30

27  
28  
29  
30  
31  
32  
33 Fong et al., “A built environmental scan is an objective review of the environmental  
34 2018 factors that influence an organization; those factors can include programs,  
35 [10] policies, and physical features (for example, the availability of visible, safe,  
36 and clean stairs for walking) within an organization” [2] p. e366  
37  
38

39  
40 Glurich et “Ad hoc environmental scans are cross sectional surveys undertaken at  
41 al., 2017 unspecified frequency, for the purpose of reviewing the current relevant  
42 [11] evidence base across a range of sources in an attempt to ascertain the current  
43 state of the art surrounding the specific topic under focus. Such scans are  
44 conducted to collect information that may inform future planning of various  
45 vested stakeholders” [11] p. 22  
46  
47  
48  
49  
50  
51  
52  
53  
54  
55  
56  
57  
58  
59  
60

- 1  
2  
3  
4 Leiva “Environmental scans were developed as tools for retrieving and organizing  
5 Portocarrero data from a wide variety of fields in order to identify contexts and shifts in  
6 et al., 2015 planning for the future. They can include internal (memos, notes from  
7 [12] meetings with stakeholders, etc) as well as external sources (e.g., newly  
8 available technologies)” [3] p. 3  
9  
10  
11 Luke et al., “An environmental scan was used to generate a map of paediatric PN  
12 2018 models of care in Canada. Originating in the business context,  
13 [13] environmental scans are useful tools to develop insight into the utilization of  
14 health services [2,3]. Environmental scans allow for the assessment of  
15 trends, status, policy initiatives and strategies within a specific area [14,15]  
16 and have the advantage of identifying and avoiding potential problems and  
17 implementing useful solutions” [16] p. e47  
18  
19  
20  
21 Medstar et “An environmental scan is an integral process for identifying, retrieving,  
22 al., 2017 and organizing information to enable health decision making and has been  
23 [17] used to foster knowledge translation in primary care.” [3,18] p. 2  
24  
25  
26 Mew et al., “We used an environmental scanning (ES) approach to consolidate  
27 2017 information from community leaders, frontline practitioners, and publically  
28 [19] available sources [3,20]. The first phase of our ES employed an active  
29 approach by gathering information from primary sources such as  
30 perspectives of First Nations health leaders and relevant stakeholders [3].  
31 The second phase employed a passive approach by gathering information  
32 from secondary sources, such as publically available information, to  
33 supplement the results obtained from the active approach” [3] p. 3  
34  
35  
36  
37  
38 Moore et “An environmental scan has been defined as the acquisition and use of  
39 al., 2015 information about events, trends and relationships in an organization’s  
40 [21] external environment, the knowledge of which would assist management in  
41 planning the organization’s future course of action” [20] p. 303  
42  
43  
44 Naumann et “In comparison, environmental scans are emerging as an effective tool to  
45 al., 2013 collect evidence pertaining to healthcare service delivery gaps...Originating  
46 [22] within the business context as a valuable method for retrieving and  
47 organizing needs assessment data, the environmental scan methodology has  
48 been growing in use and complexity, recently emerging as a popular method  
49 of effectively determining the health care needs of communities. Similar to  
50 the scoping study, both external and internal sources of data are utilized  
51 during an environmental scan. External sources of data include corporate  
52 media and sources, government data, and academic literature; internal  
53  
54  
55  
56  
57  
58  
59  
60



1  
2  
3  
4 sources include the informal records and knowledge held by individuals or  
5 organizations, personal communications, minutes of meetings, memos, and  
6 other internal documents.” [3,23] p. 32, 35  
7

8  
9 Porterfield “An environmental scan examines unpublished literature and publicly  
10 et al., 2012 available program information” [24] p. S164  
11 [24]  
12

13  
14 Richard et “Environmental scanning is a research approach that uses wide-scope  
15 al., 2016 screening methods to identify the new, the unexpected and the emerging  
16 [25] interventions, issues and challenges in health” [3] p. 2  
17

18  
19 Rowel et al., “The environmental scan is a tool that can be utilized to collect  
20 2005 data to design health programs uniquely tailored to the needs of  
21 [2] communities.” [2] p. 527 “Environmental scanning is the acquisition and  
22 use of information about events, trends and relationships in an  
23 organization's external environment, the knowledge of which would assist  
24 management in planning the organization's future course of action.” p. 529  
25 [20] and “environmental scanning as "a systematic and continuous effort to  
26 search for important cues about how the world is changing and how these  
27 changes are likely to affect your organization.” [26] p.529  
28  
29  
30

31  
32 Scime et al., “Despite origins in a business context a tool for gathering information to  
33 2018 enable strategic action p. 203 [3,20] ... Specifically, environmental scans  
34 [27] are suitable for the identification and synthesis of evidence about existing  
35 resources, organizational processes, barriers and facilitators to action, and/or  
36 knowledge and practice gaps pertaining to the topic under study. [2] p. 203  
37  
38

39  
40 Shahid et “Environmental scanning is a method most commonly used in business but  
41 al., 2008 is quite popular in the health care sector around the world [29,30,31], and is  
42 [28] used to identify emerging issues within the broader economic and political  
43 environment. [32] It is similar to situational analysis in which a review is  
44 undertaken of health strategies and policies, institutional support systems  
45 with the aim of strengthening health reform and health systems. It differs  
46 from audits which generally evaluate performance and are aimed at  
47 ascertaining the validity and reliability of information as part of quality  
48 control processes. Morrison argues that environmental scanning is a method  
49 that enables decision makers both to understand the external environment  
50 and the interconnections of its various sectors and to translate this  
51 understanding into an institution ’s planning and decision-making  
52 processes.” [33] “...The advantage of environmental scanning for  
53  
54  
55  
56  
57  
58  
59  
60

1  
2  
3  
4 organizational leaders is that knowing the internal and external environment  
5 in which the organization operates is helpful in planning their future course  
6 of action.” [20] p. 57  
7  
8  
9

10  
11 Tark et al., “Environmental scanning is a research method in which publicly available  
12 2019 information is gathered systematically and is used to evaluate both internal  
13 [34] and external environments of organizations, organizational practices, and  
14 health programs. It produces important insights on current trends and  
15 occurrences based on existing resources and can assist with the development  
16 of evidence-based policies in future practices” [34] p. 1033  
17  
18

19  
20 Wittich et “In healthcare research, the environmental scan is often employed as a  
21 al., 2018 needs-assessment tool for the purposes of improving and developing the  
22 [35] efficiency of health service programs and evidence-based policies. In using  
23 this approach, environmental or contextual factors are evaluated by  
24 reviewing existing data or actively collecting new data in the form of  
25 surveys or interviews, including a diversity of views and information, to  
26 determine the benefits, needs and efficiencies of practices within that  
27 environment” [2,3] p. 2-3  
28  
29  
30

31  
32 Wurz et al., “Environmental scans are one way to identify and collate a large body of  
33 2019 information seeking to achieve such an aim. [20,37] Moreover, they are a  
34 [36] useful way to inform strategic planning, provide evidence about the  
35 direction of a field, and raise awareness about gaps in program/service  
36 availability” [3,38] p. 1154  
37  
38

39  
40 Yurick “Environmental scans are considered a rapid review of information. The  
41 [39] information gathered is considered incomplete until validated, but gives a  
42 snapshot of current work, as well as the breadth of depth of information  
43 available” [39] p. 94  
44

---

## REFERENCES

1. Baezconde-Garbanati L, Lienemann BA, Robles M, et al. Implementation of HPV vaccination guidelines in a diverse population in Los Angeles: Results from an environmental scan of local HPV resources and needs. *Vaccine* 2017;35:4930–5.
2. Rowel R, Moore ND, Nowrojee S, et al. The utility of the environmental scan for public health practice: lessons from an urban program to increase cancer screening. *J Natl Med Assoc* 2005;97:527–34.
3. Graham P, Evitts T, Thomas-MacLean R. Environmental scans: how useful are they for primary care research? *Can Fam Physician Med Fam Can* 2008;54:1022–3.
4. Bakhru RN, Wiebe DJ, McWilliams DJ, et al. An environmental scan for early mobilization practices in U.S. ICUs. *Crit Care Med* 2015;43:2360–9.
5. Bednar EM, Walsh MT, Baker E, et al. Creation and implementation of an environmental scan to assess cancer genetics services at three oncology care settings. *J Genet Couns* 2018;27:1482-1496.
6. Society for Human Resource Management. *Strategic planning: what are the basics of environmental scanning?* 2012. [www.shrm.org/resourcesandtools/tools-and-samples/hr-qa/pages/cms\\_021670.aspx](http://www.shrm.org/resourcesandtools/tools-and-samples/hr-qa/pages/cms_021670.aspx).
7. Blackman N. *Chronic Disease and Injury Prevention Programming for Canada's Indigenous Population* [dissertation]. Walden Dissertation and Doctoral Studies, Walden University, 2018. <https://scholarworks.waldenu.edu/cgi/viewcontent.cgi?article=6444&context=dissertation>. (Accessed Feb 2021)
8. Wilburn A, Vanderpool RC, Knight JR. Environmental scanning as a public health tool: Kentucky's human papillomavirus vaccination project. *Prev Chronic Dis* 2016;13:E109
9. Canadian Partnership Against Cancer. *Environmental scanning*. 2012 Retrieved from <http://www.cancerview.ca/treatmentandsupport/grcmain/grcgd/grcgdsearchingthel>
10. Fong AJ, Jones JM, Faulkner G, et al. Exploring cancer centres for physical activity and sedentary behaviour support for breast cancer survivors. *Curr Oncol* 2018;25: e365-e372.
11. Glurich I, Nycz G, Acharya A. Status update on translation of integrated primary dental-medical care delivery for management of diabetic patients. *Clin Med Res* 2017;15:21–32.
12. Leiva Portocarrero ME, Garvelink MM, Becerra Perez MM, et al. Decision aids that support decisions about prenatal testing for down syndrome: an environmental scan. *BMC Med Inform Decis Mak* 2015;15:76.
13. Luke A, Doucet S, Azar R. Paediatric patient navigation models of care in Canada: An environmental scan. *Paediatr Child Health* 2018;23:e46-55.
14. Barker KK, Bosco C, Oandasan IF. Factors in implementing interprofessional education and collaborative practice initiatives: Findings from key informant interviews. *J Interprof Care* 2005;19(Suppl. 1):166–76.

15. Health Canada. (2003). *A request for proposal from Health Canada – Interdisciplinary Education for Collaborative, Patient-Centred Practice: Discussion paper & research report*. Ottawa, ON: Health Canada.
16. Côté G, Lauzon C, Kyd-Strickland B. Environmental scan of interprofessional collaborative practice initiatives. *J Interprof Care* 2008;22:449–60.
17. Medstar Health Research Institute, Smith K, Baker K, et al. *Guide to improving patient safety in primary care settings by engaging patients and families-environmental scan report*. Rockville, Maryland: Agency for Healthcare Research and Quality (AHRQ), 2017. <https://www.ahrq.gov/sites/default/files/wysiwyg/professionals/quality-patient-safety/patient-family-engagement/pfeprimarycare/envscan-report.pdf>. (Accessed Feb 2021).
18. Solberg LI, Elward KS, Phillips WR, et al. How can primary care cross the quality chasm? *Ann Fam Med* 2009;7:164–9.
19. Mew EJ, Ritchie SD, VanderBurgh D, et al. An environmental scan of emergency response systems and services in remote First Nations communities in Northern Ontario. *Int J Circumpolar Health* 2017;76:1320208
20. Choo CW. Environmental scanning as information seeking and organizational learning. *Inf Res* 2001;7:1–26.
21. Moore C, Lee J, Milligan J, et al. Physical activity as medicine among family health teams: an environmental scan of physical activity services in an interdisciplinary primary care setting. *Appl Physiol Nutr Metab* 2015;40:302-5.
22. Naumann DN, Reynolds JN, McColl MA, et al. Environmental scan of programs for fetal alcohol spectrum disorder in Eastern Ontario. *J Dev Disabil* 2013;19:29-49.
23. Scobba V. PS1-23: The environmental scan: a valuable community health research tool. *Clin Med Res* 2010;8:184–5
24. Porterfield DS, Hinnant LW, Kane H, et al. Linkages between clinical practices and community organizations for prevention: a literature review and environmental scan. *Am J Public Health* 2012;42:S163-S171.
25. Richard L, Furler J, Densley K, et al. Equity of access to primary healthcare for vulnerable populations: the IMPACT international online survey of innovations. *Int J Equity Health* 2016;15:64
26. Blanken RL, Liff A. *Facing the future: preparing your association to thrive: emerging trends from the ASAE Foundation's ongoing environmental scan research*. Washington, DC: American Society of Association Executives, 1999.
27. Scime NV, Burke SM. Environmental scan of breastfeeding resources in Canadian NICUs. *JOGNN* 2018;47:202–13.
28. Shahid S, Beckmann KR, Thompson SC. Supporting cancer control for Indigenous Australians: initiatives and challenges for cancer councils. *Aust Health Rev Publ Aust Hosp Assoc* 2008;32:56–65.

- 1  
2  
3 29. Marton C. Environmental scan on women's health information resources in Ontario,  
4 Canada. *Inf Res* 2001;7.  
5  
6 30. El Jardali F, Fooks C. *An environmental scan of current views on health human resources*  
7 *in Canada: identified problems, proposed solutions and gap analysis*. Prepared for the  
8 National Health Human Resources Summit 2005. Toronto, ON: Health Council of  
9 Canada.  
10  
11 31. Thomas G. *Addiction treatment indicators in Canada: an environmental scan*. Canadian  
12 Centre on Substance Abuse 2005. Ottawa, ON: Canadian Centre on Substance Abuse  
13  
14 32. Harris H, Martin C. Environmental scanning in the Australian manufacturing sector: a  
15 discussion of some early results. In: Sohal A, Cooney R. ed. *Proceedings of the Sixth*  
16 *International Research Conference on Quality Innovation and Knowledge Management*  
17 2002; 17-20 Feb Kuala Lumpur. P. 659-66  
18  
19 33. Morrison J. Environmental Scanning. In: In M. A. Whitely, J. D. Porter, and R. H. Fenske  
20 ed. *A Primer for New Institutional Researchers*. Tallahassee, Florida: The Association for  
21 Institutional Research 1992. 86–99. <http://horizon.unc.edu/courses/papers/enviroscan/>  
22 (Accessed Feb 2021).  
23  
24 34. Tark A, Agarwal M, Dick AW, et al. Variations in physician orders for life-sustaining  
25 treatment program across the nation: environmental scan. *J Palliat Med* 2019;22:1032-8.  
26  
27 35. Wittich W, Höbler F, Jarry J, et al. Recommendations for successful sensory screening in  
28 older adults with dementia in long-term care: a qualitative environmental scan of  
29 Canadian specialists. *BMJ Open* 2018;8:e019451.  
30  
31 36. Wurz A, Daeggelmann J, Albinati N, et al. Physical activity programs for children  
32 diagnosed with cancer: an international environmental scan. *Support Care Cancer*  
33 2019;27:1153–62.  
34  
35 37. Pashiardis P. Environmental scanning in educational organizations: Uses, approaches,  
36 sources and methodologies. *Int J Educ Manag* 1996;10:5–9.  
37  
38 38. Albright K. Environmental scanning: radar for organizational success. *Inf Manag J*  
39 2004;38:38–45.  
40  
41 39. Yurick J, Allatt D. *Supportive care framework report*. Alberta Health Services, Cancer  
42 Control Alberta, 2016. [https://www.albertahealthservices.ca/assets/info/hp/cancer/if-hp-](https://www.albertahealthservices.ca/assets/info/hp/cancer/if-hp-cancer-supportive-care-framework-report.pdf)  
43 [cancer-supportive-care-framework-report.pdf](https://www.albertahealthservices.ca/assets/info/hp/cancer/if-hp-cancer-supportive-care-framework-report.pdf). (Accessed Feb 2021).  
44  
45  
46  
47  
48  
49  
50  
51  
52  
53  
54  
55  
56  
57  
58  
59  
60

Supplementary File 7  
Thematic Analysis of ES Definitions

| Theme                   | Definition                                                      | Sub-Theme | Studies % (n)                                                                           | Examples                                                                                                                                                                                                                                                                                                                                                                                                                                                                                                                                                                                                                                                                                                                                                                                                                                                                                                                                                                                |
|-------------------------|-----------------------------------------------------------------|-----------|-----------------------------------------------------------------------------------------|-----------------------------------------------------------------------------------------------------------------------------------------------------------------------------------------------------------------------------------------------------------------------------------------------------------------------------------------------------------------------------------------------------------------------------------------------------------------------------------------------------------------------------------------------------------------------------------------------------------------------------------------------------------------------------------------------------------------------------------------------------------------------------------------------------------------------------------------------------------------------------------------------------------------------------------------------------------------------------------------|
| Instrument of discovery | A system for achieving a result                                 | Mechanism | 81% (17)<br>[29, 44, 70, 65, 68, 73, 82, 84, 93, 96, 110, 112, 114, 119, 127, 153, 158] | “a review”, “a mixed-method tool”, “an objective review” “cross sectional surveys”, “tools”, “an integral process”, “an effective tool”, “a research approach”, “a tool”, “a method”, “a research method”, “a rapid review”, “needs-assessment tool”                                                                                                                                                                                                                                                                                                                                                                                                                                                                                                                                                                                                                                                                                                                                    |
|                         | The acquisition of new knowledge through the process of inquiry | Learning  | 71% (15)<br>[29, 44, 65, 68, 70, 73, 82, 93, 96, 110, 114, 119, 121, 127, 153]          | “to search for important cues about how the world is changing and how these changes are likely to affect your organization”, “a popular method of effectively determining the health care needs of communities”, “to identify emerging issues”, “the new process understood in the context of the ecosystem”, “identify risks and opportunities”, “review of the environmental factors that influence an organization”, “to identify contexts and shifts”, “information about events, trends and relationships in an organization’s external environment”, “to identify the new, the unexpected and the emerging interventions, issues and challenges health”, “produces important insights on current trends and occurrences”, “to determine the benefits, needs and efficiencies of practices”, “used to foster knowledge translation in primary care”, “assess strengths, weaknesses, challenges, and opportunities for improvement”, “raise awareness of issues”, “develop insight” |

Supplementary File 7

Thematic Analysis of FS Definitions

|                            |                                                                                          |  |                                                                                           |                                                                                                                                                                                                                                                                                                                                                                                                                                                                                                                                                                                                                                                                                                                                           |
|----------------------------|------------------------------------------------------------------------------------------|--|-------------------------------------------------------------------------------------------|-------------------------------------------------------------------------------------------------------------------------------------------------------------------------------------------------------------------------------------------------------------------------------------------------------------------------------------------------------------------------------------------------------------------------------------------------------------------------------------------------------------------------------------------------------------------------------------------------------------------------------------------------------------------------------------------------------------------------------------------|
| <p>Forward-looking</p>     | <p>Anticipating or making provision for the future; progressive</p>                      |  | <p>71% (15)</p> <p>[29, 65, 68, 70, 73, 82, 84, 93, 96, 110, 112, 114, 119, 121, 127]</p> | <p>“future course of action”, “to identify emerging issues”, “future course of action”, “the new process”, “identify risks and opportunities, tailor strategic plans, or design programs”, “factors that influence an organization”, “may inform future planning”, “in planning for the future”, “emerging”, “to enable strategic action”, “future practices”, “improving and developing”, “opportunities for improvement”, ”plan for the future, develop interventions”, “avoiding potential problems and implementing useful solutions”, “inform strategic planning, provide evidence about the direction of a field”, “to guide the direction”, “initiate a project or funding opportunity”, “leading to evidence-based solutions”</p> |
| <p>Knowledge synthesis</p> | <p>An attempt to summarize all pertinent information on a specific topic or question</p> |  | <p>48% (10)</p> <p>[29, 84, 93, 96, 112, 114, 116, 121, 127, 153]</p>                     | <p>“data acquisition and use of information about events, trends and relationships”, “current relevant evidence base across a range of sources “, “retrieving and organizing data from a wide variety of fields”, “the identification and synthesis of evidence”, “publicly available information is gathered systematically and is used to evaluate”, “identifying, retrieving, and organizing information”, “to consolidate information”, “to consolidate information“, “gathering information...to supplement the results”, “generate a map”, “to identify and collate a large body of information”, “diverse types of knowledge”</p>                                                                                                  |

Supplementary File 7  
Thematic Analysis of ES Definitions

|                 |                                                                                               |  |                                                     |                                                                                                                                                                                                                                                                                                                                                                   |
|-----------------|-----------------------------------------------------------------------------------------------|--|-----------------------------------------------------|-------------------------------------------------------------------------------------------------------------------------------------------------------------------------------------------------------------------------------------------------------------------------------------------------------------------------------------------------------------------|
| Decision-making | Making choices from two or more alternatives for the purpose of achieving a preferred outcome |  | 43% (9)<br>[29, 65, 68, 84, 93, 114, 119, 127, 153] | “inform future planning”, “in planning for the future”, “planning”, “planning and decision-making processes”, “to enable health decision making”, “evaluate(d)”, “to foster knowledge translation in primary care”, “assist in health decision-making”, “to facilitate with strategic planning and decision-making”, “analyze information to guide the direction” |
|-----------------|-----------------------------------------------------------------------------------------------|--|-----------------------------------------------------|-------------------------------------------------------------------------------------------------------------------------------------------------------------------------------------------------------------------------------------------------------------------------------------------------------------------------------------------------------------------|

For peer review only
