# Supplementary material for: Use of environmental scans in health services delivery research: a scoping review
Source: PubMed Central journal article supplement — BMJ Open. 2021 Nov 10;11(11):e050284. doi: 10.1136/bmjopen-2021-050284 (PMC8587593; doi:10.1136/bmjopen-2021-050284), 2021-11-10
Supplement: bmjopen-2021-050284supp001.pdf [file bmjopen-2021-050284supp001.pdf]

## Supplementary File 1

### Search Strategy for Medline

- 1 environment\* scan\$.ti,ab,kf.
- 2 exp "Delivery of Health Care"/
- 3 exp Health Services/ and (administer\* or delegat\* or deliver\* or distribut\* or provide or providing or provision).ti,ab.
- 4 ((care or healthcare) adj4 (accessib\* or availab\* or disparit\* or equit\* or equalit\* or inaccessib\* or inequalit\*)).ti,ab,kf.
- 5 ((care or healthcare) adj4 (administer\* or delegat\* or deliver\* or distribut\* or provide or providing or provision)).ti,ab,kf.
- 6 ((care or healthcare) adj reform\*).ti,ab,kf.
- 7 case management.ti,ab,kf.
- 8 (e health or e mental health or ehealth or m health or mhealth or mobile health or telehealth or telemedicine).ti,ab,kf.
- 9 (health care adj4 (accessib\* or availab\* or disparit\* or equit\* or equalit\* or inaccessib\* or inequalit\*)).ti,ab,kf.
- 10 (health care adj4 (administer\* or delegat\* or deliver\* or distribut\* or provide or providing or provision)).ti,ab,kf.
- 11 (health adj2 reform\*).ti,ab,kf.
- 12 managed care.ti,ab,kf.
- 13 practice pattern\*.ti,ab,kf.

- 14     prescribing pattern\*.ti,ab,kf.
- 15     ((program\* or service\*) adj4 (accessib\* or availab\* or disparit\* or equit\* or equalit\*  
or inaccessib\* or inequalit\*)).ti,ab,kf.
- 16     ((program\* or service\*) adj4 (administer\* or delegat\* or deliver\* or distribut\* or  
provide or providing or provision)).ti,ab,kf.
- 17     or/2-16
- 18     1 and 17
