# Supplementary material for: Use of environmental scans in health services delivery research: a scoping review
Source: PubMed Central journal article supplement — BMJ Open. 2021 Nov 10;11(11):e050284. doi: 10.1136/bmjopen-2021-050284 (PMC8587593; doi:10.1136/bmjopen-2021-050284), 2021-11-10
Supplement: bmjopen-2021-050284supp002.pdf [file bmjopen-2021-050284supp002.pdf]

**Supplementary file 2****Selected characteristics of the peer-reviewed academic literature in the scoping review of environmental scans**

| <b>Authors/ Year</b>                   | <b>Country</b> | <b>Aim/Purpose of the Study</b>                                                                                                                                                                                                                                                                                                                                                   | <b>Healthcare Setting(s)</b>                             |
|----------------------------------------|----------------|-----------------------------------------------------------------------------------------------------------------------------------------------------------------------------------------------------------------------------------------------------------------------------------------------------------------------------------------------------------------------------------|----------------------------------------------------------|
| Abrahamyan et al. (2015) (66)          | CA             | To identify all community-based multidisciplinary wound care teams in Ontario and describe their service models.                                                                                                                                                                                                                                                                  | Multiple                                                 |
| Ahmad et al. (2015) (67)               | CA             | To develop recommendations and initiatives to improve quality of oral chemotherapy delivery in Ontario.                                                                                                                                                                                                                                                                           | Regional cancer clinics/ centres/facilities (provincial) |
| Baezconde-Garbanati et al. (2017) (68) | US             | To assess needs, resources, and understanding attitudes toward HPV vaccination.                                                                                                                                                                                                                                                                                                   | Multiple                                                 |
| Bak et al. (2013) (69)                 | CA             | To describe available evidence on the effects of radiation on ambulatory infusion pumps used to deliver chemotherapy, heighten awareness of this issue within the clinical community, provide considerations for minimizing possible negative effects on patient care, and encourage the monitoring of infusion devices after exposure to radiation/electromagnetic interference. | Regional cancer clinics/ centres/facilities (provincial) |

**Selected characteristics of the peer-reviewed academic literature in the scoping review of environmental scans**

| <b>Authors/ Year</b>           | <b>Country</b> | <b>Aim/Purpose of the Study</b>                                                                                                                                                                                 | <b>Healthcare Setting(s)</b>                             |
|--------------------------------|----------------|-----------------------------------------------------------------------------------------------------------------------------------------------------------------------------------------------------------------|----------------------------------------------------------|
| Bakhru et al. (2015) (70)      | US             | To evaluate the current level of diffusion of early mobilization practice and examine environmental factors that may influence its practice in U.S. intensive care units.                                       | Acute care                                               |
| Ball et al. (2011) (71)        | CA             | To conduct the first national ES of pediatric weight management and reflect on their role in the overall management of pediatric obesity.                                                                       | Multiple                                                 |
| Battye & McTaggart (2003) (72) | AU             | To develop a model of allied health services delivery using the principles of primary healthcare to meet the needs of 11 culturally diverse (indigenous, non-indigenous, mixed) communities in rural Australia. | Primary health care                                      |
| Bednar et al. (2018) (73)      | US             | To inform the design of a quality improvement project to increase rates of adherence to national guidelines for cancer genetic counseling and genetic testing at three unique oncology care settings.           | Acute care                                               |
| Brouwers et al. (2009) (74)    | CA             | To describe how cancer diagnostic services should be organized, structured, and evaluated in Ontario.                                                                                                           | Regional cancer clinics/ centres/facilities (provincial) |
| Carter et al. (2017) (75)      | CA             | To identify and describe health and social system navigation activities in a large urban Canadian community.                                                                                                    | Multiple                                                 |

**Selected characteristics of the peer-reviewed academic literature in the scoping review of environmental scans**

| <b>Authors/ Year</b>            | <b>Country</b> | <b>Aim/Purpose of the Study</b>                                                                                                                                                                                        | <b>Healthcare Setting(s)</b> |
|---------------------------------|----------------|------------------------------------------------------------------------------------------------------------------------------------------------------------------------------------------------------------------------|------------------------------|
| Cartmell et al. (2018) (76)     | US             | To identify contextually appropriate strategies for improving HPV vaccination uptake in South Carolina by conducting an ES of the barriers, facilitators, and strategies needed for improving HPV vaccination.         | Multiple                     |
| Chang et al. (2017) (77)        | CA             | To conduct an environmental scan of a rural primary care clinic to assess the feasibility of implementing an e-communications system between patients and clinic staff.                                                | Primary care                 |
| Davies et al. (2008) (78)       | CA             | To document the process of best practice guideline implementation by topic, to describe facilitators and barriers to implementation and to determine the impact of indicators related to process and patient outcomes. | Multiple                     |
| DeGross et al. (2014) (79)      | US             | To describe key considerations in designing a patient navigation intervention model.                                                                                                                                   | Multiple                     |
| Delparte et al. (2014) (80)     | CA             | To develop a customizable patient and family education resource for people with spinal cord injury.                                                                                                                    | Rehabilitation               |
| Finnigan-Fox et al. (2017) (81) | US             | To identify available patient decision aids relating information about hospice care and compare that information with the informational needs expressed by real-world health care consumers.                           | Palliative care              |

**Selected characteristics of the peer-reviewed academic literature in the scoping review of environmental scans**

| <b>Authors/ Year</b>            | <b>Country</b> | <b>Aim/Purpose of the Study</b>                                                                                                                                                                                           | <b>Healthcare Setting(s)</b>                             |
|---------------------------------|----------------|---------------------------------------------------------------------------------------------------------------------------------------------------------------------------------------------------------------------------|----------------------------------------------------------|
| Fong et al.<br>(2018) (82)      | CA             | To evaluate cancer centres for physical activity and sedentary behaviour information and infrastructure, and to evaluate the quality of the information accessible to breast cancer survivors in cancer centres.          | Regional cancer clinics/ centres/facilities (provincial) |
| Frost et al.<br>(2016) (83)     | US             | To better understand the experience of sickle cell disease patients, their caregivers, and providers during care transitions to determine whether and how their needs could be met through health information technology. | Multiple                                                 |
| Glurich et al.<br>(2017) (84)   | US             | To update the current status and progress in advancing establishment of models for integrated oral-dental healthcare delivery for patients with, or at risk for, diabetes.                                                | Primary care                                             |
| Goldwater et al.<br>(2014) (85) | US             | To gain a larger understanding of the experience of Community Health Centres in the acquisition, implementation and utilization of open source EHR to achieve meaningful use and to serve their patient populations.      | Multiple                                                 |
| Gustafson et al.<br>(2008) (86) | CA             | To conduct a needs assessment of injection drug use in St. John's, NL and to identify the barriers to health and health services for people injecting drugs in the city.                                                  | Multiple                                                 |

**Selected characteristics of the peer-reviewed academic literature in the scoping review of environmental scans**

| <b>Authors/ Year</b>            | <b>Country</b> | <b>Aim/Purpose of the Study</b>                                                                                                                                                                          | <b>Healthcare Setting(s)</b> |
|---------------------------------|----------------|----------------------------------------------------------------------------------------------------------------------------------------------------------------------------------------------------------|------------------------------|
| Hauck et al.<br>(2008) (87)     | AU             | To develop a framework for community mental health clinicians to improve the reproductive health outcomes for women with serious mental illness.                                                         | Multiple                     |
| Hogan et al.<br>(2014) (88)     | US             | To evaluate the effects that technology-assisted access to clinical information may have on stakeholder experiences, processes of care and health outcomes.                                              | Veterans Affairs             |
| Hogenbirk et al.<br>(2006) (89) | CA             | To examine the current status of telehealth in Canada with respect to standards, guidelines, policies or procedures.                                                                                     | Multiple                     |
| Jeon et al.<br>(2012) (90)      | CA             | To establish a set of guidelines for developing ambulatory chemotherapy preprinted orders in Canada.                                                                                                     | Ambulatory care              |
| Joschko et al.<br>(2018) (91)   | CA             | To examine different eConsult services available worldwide and compare the strategies, barriers, and successes of their implementation in different health care contexts.                                | Multiple                     |
| Kobe et al.<br>(2020) (92)      | US             | To systematically survey and interpret relevant self-management education programs to identify opportunities for their development specific to adolescent and young adult survivors of childhood cancer. | Primary health care          |

**Selected characteristics of the peer-reviewed academic literature in the scoping review of environmental scans**

| <b>Authors/ Year</b>                  | <b>Country</b> | <b>Aim/Purpose of the Study</b>                                                                                                                                                                                                    | <b>Healthcare Setting(s)</b>                     |
|---------------------------------------|----------------|------------------------------------------------------------------------------------------------------------------------------------------------------------------------------------------------------------------------------------|--------------------------------------------------|
| Leiva Portocarrero et al. (2015) (93) | CA             | To identify publicly available DAs focusing on prenatal screening/diagnosis for Down syndrome that provide effective support for decision making.                                                                                  | Not clear or not specifically reported           |
| Liddy et al. (2015) (94)              | CA             | To identify current eConsultation and eReferral systems in Canada and to gain insight into the design and implementation process of existing systems.                                                                              | Multiple                                         |
| Liddy & Mill (2014) (95)              | CA             | To identify existing policies, strategies and frameworks that support self-management initiatives for chronic disease in Canada.                                                                                                   | Health administration/Health policy system level |
| Luke et al. (2018) (96)               | CA             | To provide other organizations with useful information when implementing paediatric navigation programs and to inform the implementation of a navigation care centre in New Brunswick for children with complex health conditions. | Multiple                                         |
| Mansell et al. (2017) (97)            | CA             | To characterize pharmacists' expanded scope of practice as it relates to providing services to Canadians with diabetes.                                                                                                            | Multiple                                         |
| McDonald & Acri (2018) (98)           | US             | To examine agency-level barriers to treatment among a poverty-impacted sample of women with depressive symptoms, as well as any supports that agencies have implemented to engage consumers into services.                         | Multiple                                         |

**Selected characteristics of the peer-reviewed academic literature in the scoping review of environmental scans**

| <b>Authors/ Year</b>            | <b>Country</b> | <b>Aim/Purpose of the Study</b>                                                                                                                                                                              | <b>Healthcare Setting(s)</b>                             |
|---------------------------------|----------------|--------------------------------------------------------------------------------------------------------------------------------------------------------------------------------------------------------------|----------------------------------------------------------|
| Mew et al.<br>(2017) (99)       | CA             | To understand emergency response systems, services, and training in remote Nishnawbe Aski Nation First Nation communities.                                                                                   | Emergency services or response system                    |
| Mitchell et al.<br>(2018) (100) | US             | To document the results of an ES of the literature, resources, and policies relevant to nursing professionals and their role in preventing alcohol-exposed pregnancies and fetal alcohol spectrum disorders. | Multiple                                                 |
| Moore et al.<br>(2015) (101)    | CA             | To determine the prevalence and characteristics of physical activity services offered by Family Health Teams in Ontario.                                                                                     | Primary care                                             |
| Morton et al.<br>(2010) (102)   | CA             | To provide advice on organisational and technical aspects of the delivery of brachytherapy services in Ontario, Canada.                                                                                      | Regional cancer clinics/ centres/facilities (provincial) |
| Munce et al.<br>(2014) (103)    | CA             | To conduct a systems analysis on community and health services for individuals with acquired brain injury in the province of Ontario, Canada.                                                                | Multiple                                                 |

**Selected characteristics of the peer-reviewed academic literature in the scoping review of environmental scans**

| <b>Authors/ Year</b>            | <b>Country</b> | <b>Aim/Purpose of the Study</b>                                                                                                                                                                                                                                                  | <b>Healthcare Setting(s)</b>           |
|---------------------------------|----------------|----------------------------------------------------------------------------------------------------------------------------------------------------------------------------------------------------------------------------------------------------------------------------------|----------------------------------------|
| Naumann et al. (2013) (44)      | CA             | To explore, summarize, and map out current services for fetal alcohol syndrome disorder in order to present a comprehensive review of service accessibility in Eastern Ontario.                                                                                                  | Multiple                               |
| O'Mahony & Clark (2018) (104)   | CA             | To increase understanding of immigrant women's reproductive mental health care services within rural settings and to inform the implementation of a cross regional research program.                                                                                             | Multiple                               |
| Ocampo et al. (2017) (105)      | CA             | To understand the current practices and perceptions with respect to ward closure for hospital acquired infectious disease outbreaks in acute care hospital settings across Canada.                                                                                               | Acute care                             |
| Patel et al. (2014) (106)       | CA             | To characterize anal cancer screening practices in jurisdictions around the world with the aims of providing clinical and operational guidance for clinicians, describing the current practice and providing information from other jurisdictions for health care policy makers. | Not clear or not specifically reported |
| Porterfield et al. (2012) (107) | US             | To develop a framework for interventions that utilize linkages between clinical practices and community organizations for the delivery of preventive services, and to identify and characterize these efforts.                                                                   | Multiple                               |



### Selected characteristics of the peer-reviewed academic literature in the scoping review of environmental scans

| Authors/ Year                       | Country | Aim/Purpose of the Study                                                                                                                                      | Healthcare Setting(s) |
|-------------------------------------|---------|---------------------------------------------------------------------------------------------------------------------------------------------------------------|-----------------------|
| Poulin et al. (2014) (108)          | CA      | To determine the current preoperative skin antisepsis in Alberta, reviewed key publications and existing guidelines.                                          | Acute care            |
| Reitmanova & Gustafson (2009) (109) | CA      | To identify the range of existing mental health care services in St. John's, NL with particular attention to those targeting visible minority immigrants.     | Multiple              |
| Richard et al. (2016) (110)         | AU      | To identify, implement and trial best practice interventions to improve access to PHC for vulnerable populations.                                             | Primary health care   |
| Rosa Fortin et al. (2014) (111)     | CA      | To identify programs for managing obesity in adults and evaluate the degree to which programs adhere to recommendations.                                      | Multiple              |
| Rowel et al. (2005) (29)            | US      | To conduct the needs-assessment phase of a project to increase cancer screening among African Americans in Baltimore, MD.                                     | Multiple              |
| Scime & Burke (2018) (112)          | CA      | To determine, via key informant interviews, the types and frequencies of postnatal breastfeeding resources available to mothers of infants in Canadian NICUs. | Acute care            |
| Shahid et al. (2008) (65)           | AU      | To map activities in service provision in Indigenous cancer control with a view to sharing lessons learned.                                                   | Multiple              |

**Selected characteristics of the peer-reviewed academic literature in the scoping review of environmental scans**

| <b>Authors/ Year</b>              | <b>Country</b> | <b>Aim/Purpose of the Study</b>                                                                                                                                                                                     | <b>Healthcare Setting(s)</b>                             |
|-----------------------------------|----------------|---------------------------------------------------------------------------------------------------------------------------------------------------------------------------------------------------------------------|----------------------------------------------------------|
| Silva et al.<br>(2012) (113)      | US             | To conduct an ES of telemedicine-based stroke programs in the US and to identify success factors and barriers to the development or sustainability of telestroke programs.                                          | Multiple                                                 |
| Tark et al.<br>(2019) (114)       | US             | To identify state variations in Physician Orders for Life-Sustaining Treatment forms and determine if variations are associated with program maturity status.                                                       | End-of-life/acute care                                   |
| Vandenberg et al.<br>(2009) (115) | CA             | To provide a practical framework to guide standardized delivery of evidence-based systemic treatment in hospitals outside regional cancer centres, with special consideration for geographically dispersed regions. | Ambulatory care (cancer)                                 |
| Whitton et al.<br>(2009) (116)    | CA             | To develop the organisational standards for the delivery of intensity-modulated radiation therapy.                                                                                                                  | Regional cancer clinics/ centres/facilities (provincial) |
| Wijeysundera et al. (2012) (117)  | CA             | To understand the current availability, intensity, and complexity of services offered in specialized heart failure clinics in Ontario.                                                                              | Ambulatory care                                          |

**Selected characteristics of the peer-reviewed academic literature in the scoping review of environmental scans**

| <b>Authors/ Year</b>           | <b>Country</b> | <b>Aim/Purpose of the Study</b>                                                                                                                                                                                            | <b>Healthcare Setting(s)</b> |
|--------------------------------|----------------|----------------------------------------------------------------------------------------------------------------------------------------------------------------------------------------------------------------------------|------------------------------|
| Wittal<br>(2018) (118)         | CA             | To gain a broader understanding of survivorship care, highlight any trends, and report disparities in care during the transition from the oncology to the community setting.                                               | Multiple                     |
| Wittich et al.<br>(2018) (119) | CA             | To identify screening tools, technologies and strategies vision and hearing care specialists recommend to front-line healthcare professionals for the screening of older adults in long-term care homes who have dementia. | Multiple                     |
| Wolff et al. (2018)<br>(120)   | US             | To determine the availability of information about and features of shared access functionality to the patient portal.                                                                                                      | Multiple                     |
| Wurz et al.<br>(2019) (121)    | CA             | To identify physical activity programs for children diagnosed with cancer and summarize program characteristics.                                                                                                           | Multiple                     |
| Yergens et al.<br>(2014) (122) | CA             | To better understand the status of medical assessment units in Canada and examine the adoption and characteristics of these units.                                                                                         | Acute care                   |
