# Supplementary material for: Use of environmental scans in health services delivery research: a scoping review
Source: PubMed Central journal article supplement — BMJ Open. 2021 Nov 10;11(11):e050284. doi: 10.1136/bmjopen-2021-050284 (PMC8587593; doi:10.1136/bmjopen-2021-050284), 2021-11-10
Supplement: bmjopen-2021-050284supp003.pdf [file bmjopen-2021-050284supp003.pdf]

**Supplementary file 3****Characteristics of the grey literature studies in the scoping review of environmental scans.**

| <b>Authors/ Year</b>                                         | <b>Country</b> | <b>Aim/Purpose of the Study</b>                                                                                                                                                                                            | <b>Healthcare Setting(s)</b>           |
|--------------------------------------------------------------|----------------|----------------------------------------------------------------------------------------------------------------------------------------------------------------------------------------------------------------------------|----------------------------------------|
| Archer et al. (2010) (123)                                   | CA             | To describe the design, functionality, implementations, applications, outcomes, and the perceived and real benefits of ePersonal Health Records that have been used thus far, with a particular emphasis on North America. | Not clear or not specifically reported |
| Association of Maternal & Child Health Programs (2011) (124) | US             | To provide insight into approaches that state Title V programs are taking to address the growing incidence of autism spectrum disorder and other developmental disabilities (ASD/DD)                                       | Multiple                               |
| Bandali (2014) (125)                                         | CA             | To understand current breastfeeding services within Alberta Health Services acute care and community facilities.                                                                                                           | Multiple                               |
| Bella et al. (2005) (126)                                    | US             | To promote the development of new models of care for consumers with multiple chronic conditions who are served by Medicaid or are dually eligible for Medicaid and Medicare.                                               | Multiple                               |
| Blackman (2018) (127)                                        | CA             | To compile an inventory of existing Chronic Disease and Injury Prevention (CDIP) programming that is culturally appropriate to the indigenous population.                                                                  | Primary health care                    |

**Characteristics of the grey literature studies in the scoping review of environmental scans.**

| <b>Authors/ Year</b>                            | <b>Country</b> | <b>Aim/Purpose of the Study</b>                                                                                                                                                                                     | <b>Healthcare Setting(s)</b> |
|-------------------------------------------------|----------------|---------------------------------------------------------------------------------------------------------------------------------------------------------------------------------------------------------------------|------------------------------|
| Boonyasai et al. (2014) (128)                   | US             | To conduct an environmental scan of the literature on Emergency Department (ED) discharge procedures to describe existing processes, along with their strengths, weaknesses, omissions, barriers, and facilitators. | Acute care                   |
| Campos & Manning (2006) (129)                   | CA             | To identify service priorities in Brandon and Winnipeg for immigrants and refugees infected with, affected by, or at risk for HIV.                                                                                  | Multiple                     |
| Cowling & Dolcine (2017) (130)                  | CA             | To identify and analyze evidence and information regarding how Point of Care Testing (POCT) is implemented and managed in jurisdictions across Canada.                                                              | Multiple                     |
| Deshpande, Khola, Lorca et al. (2008a) (131)    | CA             | To provide a critical evaluation of the available data on the use of clinical applications of asynchronous telehealth.                                                                                              | Multiple                     |
| Deshpande, Khola, Mckibbon et al. (2008b) (132) | CA             | To provide a critical evaluation of the available data on the use of telehealth for acute stroke patients.                                                                                                          | Multiple                     |

**Characteristics of the grey literature studies in the scoping review of environmental scans.**

| <b>Authors/ Year</b>                                 | <b>Country</b> | <b>Aim/Purpose of the Study</b>                                                                                                                                                                                                  | <b>Healthcare Setting(s)</b>           |
|------------------------------------------------------|----------------|----------------------------------------------------------------------------------------------------------------------------------------------------------------------------------------------------------------------------------|----------------------------------------|
| Dietitians of Canada (2018) (133)                    | CA             | To describe the current dietetic workforce and the role of dietitians as interprofessional health team members in Canadian provinces and territories.                                                                            | Primary health care                    |
| Forsberg et al. (2014) (134)                         | US             | To summarize current preventive service utilization patterns and barriers, documented cost and health outcomes associated with prevention, and activities and efforts designed to improve preventive service rates and outcomes. | Not clear or not specifically reported |
| Garland (2015) (135)                                 | CA             | To identify and summarize information about independent ambulatory cancer care centres in Canada, including services and interventions provided to cancer patients outside traditional acute care settings.                      | Ambulatory care (cancer)               |
| Great Plains Quality Innovation Network (2016) (136) | US             | To collect information regarding current status of medication safety efforts to detect and prevent Adverse Drug Events (ADE) within the Great Plains Quality Innovation Network (QIN).                                           | Multiple                               |

**Characteristics of the grey literature studies in the scoping review of environmental scans.**

| <b>Authors/ Year</b>               | <b>Country</b> | <b>Aim/Purpose of the Study</b>                                                                                                                                                                                                                                        | <b>Healthcare Setting(s)</b> |
|------------------------------------|----------------|------------------------------------------------------------------------------------------------------------------------------------------------------------------------------------------------------------------------------------------------------------------------|------------------------------|
| Health Tech Solutions (2018) (137) | US             | To develop an accurate “As-Is” understanding of the Health Information Technology (HIT) landscape within the State of Alaska.                                                                                                                                          | Multiple                     |
| Hochman et al. (2019) (138)        | US             | To examine what is currently known about reducing readmissions from the primary care perspective by analyzing the findings of 42 peer-reviewed articles and 30 items from the gray literature.                                                                         | Primary care                 |
| Loorand-Stiver (2012a) (139)       | CA             | To provide an overview of existing falls prevention strategies targeting adults (18 years and older) in outpatient or community-based mental health and/or addiction programs in Canada.                                                                               | Multiple                     |
| Loorand-Stiver (2012b) (140)       | CA             | To gather information from long-term ventilation (LTV) programs in British Columbia, Alberta, Manitoba, Ontario, and Newfoundland and Labrador regarding the transitioning of medically stable LTVD patients out of critical care units into alternate levels of care. | Multiple                     |

**Characteristics of the grey literature studies in the scoping review of environmental scans.**

| <b>Authors/ Year</b>                                           | <b>Country</b> | <b>Aim/Purpose of the Study</b>                                                                                                                                                                                                                                                                                                                                                                                               | <b>Healthcare Setting(s)</b> |
|----------------------------------------------------------------|----------------|-------------------------------------------------------------------------------------------------------------------------------------------------------------------------------------------------------------------------------------------------------------------------------------------------------------------------------------------------------------------------------------------------------------------------------|------------------------------|
| Mason & Ford<br>(2017) (141)                                   | CA             | To Identify and summarize information regarding the feeding and swallowing assessment services provided to pediatric populations in Canada.                                                                                                                                                                                                                                                                                   | Multiple                     |
| McGrath et al.<br>(2017) (142)                                 | CA             | To explore how e-mental health is integrated within health systems and/or health policy nationwide.                                                                                                                                                                                                                                                                                                                           | Multiple                     |
| MedStar Health<br>Research<br>Institute et al.<br>(2017) (153) | US             | To identify: 1) studies on methods to engage patients and families in their care in primary care settings and the impact of these methods on patient safety; 2) existing interventions and associated tools to improve safety; 3) gaps between existing tools and those that need to be developed; 4) examples of primary care practices that have engaged patients and families in care with improvements in patient safety. | Primary care                 |
| Moran et al.<br>(2017) (143)                                   | US             | To review on implementation of medication-assisted treatment (MAT) for opioid use disorder (OUD) in rural primary care settings.                                                                                                                                                                                                                                                                                              | Primary care                 |

**Characteristics of the grey literature studies in the scoping review of environmental scans.**

| <b>Authors/ Year</b>              | <b>Country</b> | <b>Aim/Purpose of the Study</b>                                                                                                                                           | <b>Healthcare Setting(s)</b>           |
|-----------------------------------|----------------|---------------------------------------------------------------------------------------------------------------------------------------------------------------------------|----------------------------------------|
| Morrison (2009)<br>(144)          | CA             | To provide information regarding seasonal influenza and H1N1 vaccination programs currently offered in Canadian jurisdictions.                                            | Not clear or not specifically reported |
| Morrison & Dowler (2011)<br>(145) | CA             | To provide a general overview of newborn screening in Canada, including resources used and the retention period for samples.                                              | Multiple                               |
| Murzin & Furlotte (2013) (146)    | CA             | To outline the results of a national survey of programs and services which address the needs of older people living with HIV (PLWHIV) in Canada.                          | Multiple                               |
| Ndegwa (2010)<br>(147)            | CA             | To provide information regarding support services provided by cardiac rehabilitation programs across Canada.                                                              | Rehabilitation                         |
| Ndegwa (2011)<br>(148)            | CA             | To provide a general overview of regional health authority and other local level frameworks, initiatives, programs, and/or strategies developed to support healthy aging. | Multiple                               |

**Characteristics of the grey literature studies in the scoping review of environmental scans.**

| <b>Authors/ Year</b>         | <b>Country</b> | <b>Aim/Purpose of the Study</b>                                                                                                                                                                                                                                                                            | <b>Healthcare Setting(s)</b> |
|------------------------------|----------------|------------------------------------------------------------------------------------------------------------------------------------------------------------------------------------------------------------------------------------------------------------------------------------------------------------|------------------------------|
| Ndegwa et al. (2018) (149)   | CA             | To provide information about available services, factors affecting access, and funding practices related to nonpharmacological therapies for chronic non-cancer pain in Canada.                                                                                                                            | Multiple                     |
| Paccagnan et al (2017) (150) | CA             | To inform further development and population of the Bone and Joint Health Strategic Clinical Network (BJNSCN) Model of Care for Osteoarthritis Management (OA Model) by identifying programs and education tools in Alberta, Canada, and internationally for the management of hip and/or knee OA symptoms | Multiple                     |
| Seal et al. (2018) (151)     | CA             | To gather jurisdictional perspectives on ankyloglossia diagnosis and treatment in Canada.                                                                                                                                                                                                                  | Multiple                     |
| Smith (2001) (152)           | CA             | To examine resources and policies relating to access and equity in all Health Units and Community Health Centers in Ontario.                                                                                                                                                                               | Primary health care          |
| Topfer & Spry (2019) (154)   | CA             | To understand current resources and practices for sepsis detection in rural and remote settings.                                                                                                                                                                                                           | Multiple                     |

**Characteristics of the grey literature studies in the scoping review of environmental scans.**

| <b>Authors/ Year</b>         | <b>Country</b> | <b>Aim/Purpose of the Study</b>                                                                                                                                                                                                                                                                                                                                                                  | <b>Healthcare Setting(s)</b> |
|------------------------------|----------------|--------------------------------------------------------------------------------------------------------------------------------------------------------------------------------------------------------------------------------------------------------------------------------------------------------------------------------------------------------------------------------------------------|------------------------------|
| Tran et al. (2008)<br>(155)  | CA             | To evaluate the clinical benefit and to review the cost effectiveness of home telehealth versus usual care or no care for the management of diabetes, heart failure, and chronic obstructive pulmonary disease (COPD).                                                                                                                                                                           | Multiple                     |
| Wells et al. (2019)<br>(156) | CA             | To gain direct stakeholder perspectives on the current context surrounding opioid addiction programs (including both opioid OADs and other non-pharmacological programming) and care setting transitions.                                                                                                                                                                                        | Multiple                     |
| Young et al.<br>(2018) (157) | CA             | To identify existing or developing internet-delivered Cognitive Behaviour Therapy (iCBT) programs for treating patients with major depressive disorder (MDD) and anxiety disorders, to describe the relevant facilitators and barriers to implementation of these programs, and to explore the range of strategies that have been used to establish iCBT programs across Canadian jurisdictions. | Multiple                     |



**Characteristics of the grey literature studies in the scoping review of environmental scans.**

| <b>Authors/ Year</b>            | <b>Country</b> | <b>Aim/Purpose of the Study</b>                                                                                                             | <b>Healthcare Setting(s)</b> |
|---------------------------------|----------------|---------------------------------------------------------------------------------------------------------------------------------------------|------------------------------|
| Yurick & Allatt<br>(2016) (158) | CA             | To understand current state, functions, and components of comprehensive cancer-related supportive care in Canada, USA, UK, and New Zealand. | Multiple                     |
