# Supplementary material for: Use of environmental scans in health services delivery research: a scoping review
Source: PubMed Central journal article supplement — BMJ Open. 2021 Nov 10;11(11):e050284. doi: 10.1136/bmjopen-2021-050284 (PMC8587593; doi:10.1136/bmjopen-2021-050284), 2021-11-10
Supplement: bmjopen-2021-050284supp004.pdf [file bmjopen-2021-050284supp004.pdf]

## Supplementary file 4

## Environmental scan methods, data sources, and scanning mode characteristics studies from the peer-reviewed academic databases\*

| Authors/<br>Year                     | Data Collection Methods |        |                                            |             |                        |       | Data Sources     |                          |                          |                   |                     |       | Data Source Mode  |                     |                   |                     | Scanning Mode                                 |                                    |
|--------------------------------------|-------------------------|--------|--------------------------------------------|-------------|------------------------|-------|------------------|--------------------------|--------------------------|-------------------|---------------------|-------|-------------------|---------------------|-------------------|---------------------|-----------------------------------------------|------------------------------------|
|                                      | Literature review       | Survey | Key informant / semi-structured interviews | Focus group | Other personal contact | Other | Personal sources | Administrative databases | Reports or internal docs | Academic database | Internet web search | Other | Internal personal | Internal impersonal | External personal | External impersonal | Conditioned viewing - Passive data collection | Searching - Active data collection |
| Abrahamyan et al. 2015 (66)          |                         | X      |                                            |             | X                      | X     | X                |                          |                          |                   |                     | X     |                   |                     |                   |                     |                                               | X                                  |
| Ahmad et al. 2015 (67)               |                         |        | X                                          |             | X                      |       | X                |                          |                          |                   |                     | X     |                   |                     |                   |                     |                                               | X                                  |
| Baezconde-Garbanati et al. 2017 (68) | X                       |        | X                                          |             | X                      |       | X                |                          | X                        |                   |                     | X     |                   | X                   | X                 | X                   | X                                             | X                                  |
| Bak et al. 2013 (69)                 | X                       |        |                                            |             |                        |       |                  |                          |                          | X                 |                     |       |                   |                     | X                 | X                   |                                               |                                    |
| Bakhru et al. 2015 (70)              |                         | X      |                                            |             |                        |       | X                |                          |                          |                   |                     |       |                   | X                   |                   |                     |                                               | X                                  |
| Ball et al. 2011 (71)                |                         | X      |                                            |             | X                      | X     | X                |                          |                          |                   |                     |       |                   | X                   |                   |                     |                                               | X                                  |

| Authors/<br>Year          | Data Collection Methods |        |                                            |             |                        |       | Data Sources     |                          |                          |                   |                     |       | Data Source Mode  |                     |                   |                     | Scanning Mode                                 |                                    |
|---------------------------|-------------------------|--------|--------------------------------------------|-------------|------------------------|-------|------------------|--------------------------|--------------------------|-------------------|---------------------|-------|-------------------|---------------------|-------------------|---------------------|-----------------------------------------------|------------------------------------|
|                           | Literature review       | Survey | Key informant / semi-structured interviews | Focus group | Other personal contact | Other | Personal sources | Administrative databases | Reports or internal docs | Academic database | Internet web search | Other | Internal personal | Internal impersonal | External personal | External impersonal | Conditioned viewing - Passive data collection | Searching - Active data collection |
| Battye et al. 2003 (72)   |                         |        | X                                          | X           | X                      | X     | X                | X                        | X                        |                   |                     | X     | X                 | X                   | X                 |                     | X                                             | X                                  |
| Bednar et al. 2018 (73)   | X                       | X      | X                                          |             | X                      |       | X                |                          | X                        | X                 |                     | X     | X                 | X                   | X                 |                     | X                                             | X                                  |
| Brouwers et al. 2009 (74) | X                       |        | X                                          |             |                        |       | X                |                          |                          | X                 |                     | X     |                   | X                   | X                 |                     | X                                             | X                                  |
| Carter et al. 2017 (75)   |                         | X      |                                            |             |                        |       | X                |                          |                          |                   |                     |       |                   | X                   |                   |                     |                                               | X                                  |
| Cartmell et al. 2018 (76) |                         | X      | X                                          |             | X                      |       | X                |                          |                          |                   |                     | X     |                   | X                   |                   |                     |                                               | X                                  |
| Chang et al. 2017 (77)    |                         | X      | X                                          |             |                        |       | X                |                          |                          |                   |                     | X     |                   | X                   |                   |                     |                                               | X                                  |
| Davies et al. 2008 (78)   |                         |        |                                            |             | X                      | X     | X                |                          | X                        |                   |                     | X     | X                 |                     |                   |                     |                                               | X                                  |
| DeGroff et al. 2014 (79)  | X                       |        | X                                          |             |                        |       | X                |                          | X                        | X                 |                     |       |                   | X                   | X                 |                     | X                                             | X                                  |
| Delparte et al. 2014 (80) | X                       |        |                                            |             |                        |       |                  |                          | X                        | X                 | X                   |       | X                 |                     | X                 |                     | X                                             |                                    |

| Authors/<br>Year              | Data Collection Methods |        |                                            |             |                        |       | Data Sources     |                          |                          |                   |                     |       | Data Source Mode  |                     |                   |                     | Scanning Mode                                 |                                    |
|-------------------------------|-------------------------|--------|--------------------------------------------|-------------|------------------------|-------|------------------|--------------------------|--------------------------|-------------------|---------------------|-------|-------------------|---------------------|-------------------|---------------------|-----------------------------------------------|------------------------------------|
|                               | Literature review       | Survey | Key informant / semi-structured interviews | Focus group | Other personal contact | Other | Personal sources | Administrative databases | Reports or internal docs | Academic database | Internet web search | Other | Internal personal | Internal impersonal | External personal | External impersonal | Conditioned viewing - Passive data collection | Searching - Active data collection |
| Finnigan-Fox et al. 2017 (81) | X                       |        |                                            |             | X                      |       | X                |                          |                          | X                 | X                   |       | X                 |                     | X                 | X                   | X                                             | X                                  |
| Fong et al. 2018 (82)         | X                       |        |                                            |             |                        | X     |                  |                          |                          |                   |                     | X     |                   | X                   |                   |                     | X                                             | X                                  |
| Frost et al. 2016 (83)        | X                       |        |                                            |             |                        |       |                  |                          | X                        | X                 |                     |       |                   |                     | X                 | X                   |                                               |                                    |
| Glurich et al. 2017 (84)      | X                       |        |                                            |             |                        |       |                  | X                        | X                        | X                 | X                   |       |                   |                     | X                 | X                   |                                               |                                    |
| Goldwater et al. 2014 (85)    | X                       |        | X                                          |             |                        | X     | X                | X                        | X                        | X                 | X                   |       |                   | X                   | X                 | X                   | X                                             | X                                  |
| Gustafson et al. 2008 (86)    | **<br>NSI               | -      | -                                          | -           | -                      |       | -                | -                        | -                        | -                 | -                   | -     | -                 | -                   | -                 | -                   | -                                             | -                                  |
| Hauck et al. 2008 (87)        | -<br>NSI                | -      | -                                          | -           | -                      |       | -                | -                        | -                        | -                 | -                   | -     | -                 | -                   | -                 | -                   | -                                             | -                                  |
| Hogan et al. 2014 (88)        | X                       |        |                                            |             |                        |       |                  |                          | X                        | X                 |                     |       |                   |                     | X                 | X                   |                                               |                                    |

| Authors/<br>Year                    | Data Collection Methods |        |                                            |             |                        |       | Data Sources     |                          |                          |                   |                     |       | Data Source Mode  |                     |                   |                     | Scanning Mode                                 |                                    |
|-------------------------------------|-------------------------|--------|--------------------------------------------|-------------|------------------------|-------|------------------|--------------------------|--------------------------|-------------------|---------------------|-------|-------------------|---------------------|-------------------|---------------------|-----------------------------------------------|------------------------------------|
|                                     | Literature review       | Survey | Key informant / semi-structured interviews | Focus group | Other personal contact | Other | Personal sources | Administrative databases | Reports or internal docs | Academic database | Internet web search | Other | Internal personal | Internal impersonal | External personal | External impersonal | Conditioned viewing - Passive data collection | Searching - Active data collection |
| Hogenbirk et al. 2006 (89)          | X                       | X      | X                                          |             |                        |       | X                |                          | X                        |                   |                     |       |                   | X                   | X                 | X                   | X                                             |                                    |
| Jeon et al. 2012 (90)               | X                       |        |                                            |             |                        |       |                  |                          |                          | X                 |                     |       |                   |                     | X                 | X                   |                                               |                                    |
| Joschko et al. 2018 (91)            | X                       |        | X                                          |             |                        |       | X                |                          | X                        | X                 |                     |       |                   | X                   | X                 | X                   | X                                             |                                    |
| Kobe et al. 2019 (92)               | X                       |        |                                            |             |                        |       |                  |                          | NSI                      | NSI               |                     |       |                   |                     | X                 | X                   |                                               |                                    |
| Leiva Portocarrero et al. 2015 (93) | X                       |        |                                            |             | X                      | X     | X                |                          |                          | X                 | X                   |       |                   | X                   | X                 | X                   | X                                             |                                    |
| Liddy et al. 2015 (94)              | X                       |        | X                                          |             |                        |       | X                |                          | X                        | X                 |                     |       |                   | X                   | X                 | X                   | X                                             |                                    |
| Liddy & Mill, 2014 (95)             | X                       |        | X                                          |             |                        |       | X                |                          |                          | X                 |                     |       |                   | X                   | X                 | X                   | X                                             |                                    |
| Luke et al. 2018 (96)               | X                       |        | X                                          |             |                        |       | X                |                          | X                        | X                 |                     |       |                   | X                   | X                 | X                   | X                                             |                                    |

| Authors/<br>Year           | Data Collection Methods |        |                                            |             |                        |       | Data Sources     |                          |                          |                   |                     |       | Data Source Mode  |                     |                   |                     | Scanning Mode                                 |                                    |
|----------------------------|-------------------------|--------|--------------------------------------------|-------------|------------------------|-------|------------------|--------------------------|--------------------------|-------------------|---------------------|-------|-------------------|---------------------|-------------------|---------------------|-----------------------------------------------|------------------------------------|
|                            | Literature review       | Survey | Key informant / semi-structured interviews | Focus group | Other personal contact | Other | Personal sources | Administrative databases | Reports or internal docs | Academic database | Internet web search | Other | Internal personal | Internal impersonal | External personal | External impersonal | Conditioned viewing - Passive data collection | Searching - Active data collection |
| Mansell et al. 2017 (97)   | X                       |        | X                                          |             |                        |       | X                |                          |                          | X                 |                     |       |                   | X                   | X                 | X                   | X                                             |                                    |
| McDonald & Acri, 2018 (98) | X                       | X      |                                            |             |                        |       | X                |                          |                          | X                 |                     |       |                   | X                   | X                 | X                   | X                                             |                                    |
| Mew et al. 2017 (99)       | X                       |        | X                                          |             | X                      |       | X                |                          | X                        | X                 |                     | X     | X                 | X                   | X                 | X                   | X                                             |                                    |
| Mitchell et al. 2017 (100) | X                       |        |                                            |             | X                      |       | X                |                          | X                        | X                 | X                   |       |                   | X                   | X                 | X                   |                                               |                                    |
| Moore et al. 2015 (101)    |                         |        | X                                          |             |                        |       | X                |                          |                          |                   |                     | X     |                   |                     |                   |                     | X                                             |                                    |
| Morton et al. 2010 (102)   | X                       |        |                                            |             |                        |       |                  |                          |                          | X                 |                     |       |                   |                     | X                 | X                   |                                               |                                    |
| Munce et al. 2010 (103)    | X                       |        |                                            |             |                        |       |                  |                          | X                        | X                 |                     |       |                   |                     | X                 | X                   |                                               |                                    |
| Naumann et al. 2013 (44)   | X                       |        | X                                          |             | X                      | X     | X                |                          | X                        | X                 | X                   | X     | X                 | X                   | X                 | X                   | X                                             |                                    |

| Authors/<br>Year                  | Data Collection Methods |        |                                            |             |                        |       | Data Sources     |                          |                          |                   |                     |       | Data Source Mode  |                     |                   |                     | Scanning Mode                                 |                                    |
|-----------------------------------|-------------------------|--------|--------------------------------------------|-------------|------------------------|-------|------------------|--------------------------|--------------------------|-------------------|---------------------|-------|-------------------|---------------------|-------------------|---------------------|-----------------------------------------------|------------------------------------|
|                                   | Literature review       | Survey | Key informant / semi-structured interviews | Focus group | Other personal contact | Other | Personal sources | Administrative databases | Reports or internal docs | Academic database | Internet web search | Other | Internal personal | Internal impersonal | External personal | External impersonal | Conditioned viewing - Passive data collection | Searching - Active data collection |
| Ocampo et al. 2017 (105)          |                         | X      |                                            |             |                        |       | X                |                          |                          |                   |                     |       |                   |                     | X                 |                     |                                               | X                                  |
| O'Mahony & Clark, 2018 (104)      | X                       | X      | X                                          |             |                        |       | X                |                          |                          | X                 |                     | X     | X                 |                     | X                 | X                   |                                               | X                                  |
| Patel et al. 2014 (106)           |                         | X      |                                            |             |                        |       | X                |                          |                          |                   |                     |       |                   | X                   |                   |                     |                                               | X                                  |
| Porterfield et al. 2012 (107)     | X                       |        |                                            |             |                        |       |                  |                          |                          | X                 |                     |       |                   |                     | X                 | X                   |                                               |                                    |
| Poulin et al. 2014 (108)          |                         | X      |                                            |             |                        |       | X                |                          |                          |                   |                     | X     |                   |                     |                   |                     |                                               | X                                  |
| Reitmanova & Gustafson 2009 (109) | X                       |        |                                            |             |                        |       |                  |                          |                          | X                 | X                   |       | X                 |                     | X                 | X                   |                                               |                                    |
| Richard et al. 2016 (110)         |                         | X      |                                            |             |                        |       | X                |                          |                          |                   |                     |       |                   | X                   |                   |                     |                                               | X                                  |
| Rosa Fortin et al. 2014 (111)     |                         | X      |                                            |             | X                      |       | X                |                          |                          |                   |                     |       |                   | X                   |                   |                     |                                               | X                                  |

| Authors/<br>Year               | Data Collection Methods |        |                                            |             |                        |       | Data Sources     |                          |                          |                   |                     |       | Data Source Mode  |                     |                   |                     | Scanning Mode                                 |                                    |
|--------------------------------|-------------------------|--------|--------------------------------------------|-------------|------------------------|-------|------------------|--------------------------|--------------------------|-------------------|---------------------|-------|-------------------|---------------------|-------------------|---------------------|-----------------------------------------------|------------------------------------|
|                                | Literature review       | Survey | Key informant / semi-structured interviews | Focus group | Other personal contact | Other | Personal sources | Administrative databases | Reports or internal docs | Academic database | Internet web search | Other | Internal personal | Internal impersonal | External personal | External impersonal | Conditioned viewing - Passive data collection | Searching - Active data collection |
| Rowel et al. 2008 (29)         | X                       |        | X                                          | X           | X                      | X     | X                | X                        | X                        |                   | X                   | X     | X                 | X                   | X                 | X                   | X                                             | X                                  |
| Scime & Burke 2018 (112)       |                         |        | X                                          |             |                        |       | X                |                          |                          |                   |                     |       |                   | X                   |                   |                     |                                               | X                                  |
| Shahid et al. 2008 (65)        |                         |        | X                                          |             | X                      |       | X                |                          |                          |                   |                     | X     |                   |                     |                   |                     |                                               | X                                  |
| Silva et al. 2012 (113)        | X                       | X      | X                                          |             | X                      |       | X                |                          |                          | X                 | X                   |       |                   | X                   | X                 | X                   | X                                             | X                                  |
| Tark et al. 2019 (114)         | X                       |        |                                            |             |                        |       |                  |                          |                          | X                 |                     |       |                   |                     | X                 | X                   |                                               |                                    |
| Vandenberg et al. 2009 (115)   | X                       |        |                                            |             |                        |       |                  | X                        |                          | X                 |                     |       | X                 |                     | X                 | X                   |                                               |                                    |
| Whitton e al. 2009 (116)       | X                       |        |                                            |             |                        |       |                  | X                        |                          | X                 |                     |       | X                 |                     | X                 | X                   |                                               |                                    |
| Wijeysundera et al. 2012 (117) |                         |        | X                                          |             | X                      |       | X                |                          |                          |                   |                     | X     |                   |                     |                   |                     |                                               | X                                  |

| Authors/<br>Year          | Methods           |        |                                              |             |                        |       | Data Sources     |                          |                          |                   |                     |       | Data Source Mode  |                     |                   |                     | Scanning Mode                                 |                                    |
|---------------------------|-------------------|--------|----------------------------------------------|-------------|------------------------|-------|------------------|--------------------------|--------------------------|-------------------|---------------------|-------|-------------------|---------------------|-------------------|---------------------|-----------------------------------------------|------------------------------------|
|                           | Literature review | Survey | Key informant / semi - structured interviews | Focus group | Other personal contact | Other | Personal sources | Administrative databases | Reports or internal docs | Academic database | Internet web search | Other | Internal personal | Internal impersonal | External personal | External impersonal | Conditioned viewing - Passive data collection | Searching - Active data collection |
| Wittal 2018 (118)         | X                 |        | X                                            |             |                        |       | X                |                          | X                        | X                 | X                   | X     | X                 | X                   | X                 | X                   | X                                             | X                                  |
| Wittich et al. 2018 (119) |                   |        | X                                            |             |                        |       | X                |                          |                          |                   |                     |       |                   | X                   |                   |                     |                                               | X                                  |
| Wolff et al. 2018 (120)   | X                 |        |                                              |             |                        |       |                  |                          |                          | X                 |                     |       |                   |                     | X                 | X                   |                                               |                                    |
| Wurz et al. 2019 (121)    | X                 |        | X                                            |             | X                      |       | X                |                          | X                        | X                 |                     | X     |                   | X                   | X                 | X                   | X                                             | X                                  |
| Yergens et al. 2014 (122) |                   | X      |                                              |             |                        |       | X                |                          |                          |                   |                     | X     |                   | X                   |                   |                     |                                               | X                                  |

\* The data collection methods, data sources, data source mode, and scanning mode refer only to the environmental scanning component of the study. \*\* NSI=Not clear or not specifically reported
