# Supplementary material for: Use of environmental scans in health services delivery research: a scoping review
Source: PubMed Central journal article supplement — BMJ Open. 2021 Nov 10;11(11):e050284. doi: 10.1136/bmjopen-2021-050284 (PMC8587593; doi:10.1136/bmjopen-2021-050284), 2021-11-10
Supplement: bmjopen-2021-050284supp005.pdf [file bmjopen-2021-050284supp005.pdf]

Supplementary file 5

Environmental scan data collection methods, data sources, and scanning mode characteristics of studies from grey literature\*

| Authors/<br>Year                                                     | Data Collection Methods                          |        |                                             |             |                                                                    |                                                  | Data Sources   |                          |                                                                              |                                               |                                                                             |                                  | Data Source Mode        |                             |                         |                             | Scanning Mode                                 |                                    |
|----------------------------------------------------------------------|--------------------------------------------------|--------|---------------------------------------------|-------------|--------------------------------------------------------------------|--------------------------------------------------|----------------|--------------------------|------------------------------------------------------------------------------|-----------------------------------------------|-----------------------------------------------------------------------------|----------------------------------|-------------------------|-----------------------------|-------------------------|-----------------------------|-----------------------------------------------|------------------------------------|
|                                                                      | Literature review (academic and grey literature) | Survey | Key informant / semi- structured interviews | Focus group | Other person contact (e.g. advisory groups, individuals, networks) | Other (e.g. database, site visits, social media) | Person sources | Administrative databases | Other grey literature (e.g. reports, guidelines, policies, tools, materials) | Academic databases (peer-reviewed literature) | Internet/web (e.g. search for tools reports, policies/guideline, materials) | Other (e.g. media, social media) | Internal person sources | Internal non-person sources | External person sources | External non-person sources | Conditioned viewing - Passive data collection | Searching - Active data collection |
| Archer et al. 2010 (123)                                             | X                                                |        |                                             |             |                                                                    |                                                  |                |                          | X                                                                            |                                               |                                                                             |                                  |                         |                             |                         | X                           |                                               |                                    |
| Association of Maternal and Child Health Programs (AMCHP) 2011 (124) |                                                  |        |                                             |             |                                                                    | X                                                |                |                          |                                                                              |                                               | X                                                                           |                                  |                         |                             |                         | X                           |                                               |                                    |
| Bandali 2014 (125)                                                   | X                                                | X      | X                                           |             |                                                                    |                                                  | X              | X                        |                                                                              |                                               |                                                                             | X                                | X                       |                             |                         | X                           | X                                             |                                    |
| Bella et al. 2005 (126)                                              | X                                                | X      | X                                           |             | X                                                                  | X                                                |                | X                        | NSI                                                                          | NSI                                           |                                                                             | X                                | X                       | X                           | X                       | X                           | X                                             |                                    |

BMJ Publishing Group Limited (BMJ) disclaims all liability and responsibility arising from any reliance placed on this supplemental material which has been supplied by the author(s)

Charlton P, et al. *BMJ Open* 2022; 11:e00284. doi: 10.1136/bmjopen-2021-050284

| Authors/<br>Year                            | Data Collection Methods |   |   |   |   |  | Data Sources |  |   |  |  | Data Source Mode |  |  |  | Scanning Mode |   |
|---------------------------------------------|-------------------------|---|---|---|---|--|--------------|--|---|--|--|------------------|--|--|--|---------------|---|
| Blackman 2018 (127)                         | X                       |   |   |   |   |  | X            |  |   |  |  |                  |  |  |  | X             |   |
| Boonyasai et al. 2014 (128)                 | X                       |   |   |   |   |  | X            |  |   |  |  |                  |  |  |  | X             |   |
| Campos & Manning 2006 (129)                 | X                       |   | X | X |   |  | X            |  | X |  |  |                  |  |  |  | X             |   |
| Cowling & Dolcine 2017 (130)                | X                       |   | X |   |   |  | X            |  | X |  |  |                  |  |  |  | X             |   |
| Deshpande, Khoja, Lorca, et al. 2008a (131) | X                       | X |   |   | X |  | X            |  | X |  |  |                  |  |  |  | X             | X |

BMJ Publishing Group Limited (BMJ) disclaims all liability and responsibility arising from any reliance placed on this supplemental material which has been supplied by the author(s)

Literature review (academic and grey literature)

Survey

Key informant / semi- structured interviews

Focus group

Other person contact (e.g. advisory groups, individuals, networks)

Other (e.g. database, site visits, social media)

Person sources

Administrative databases

Other grey literature (e.g. reports, guidelines, policies, tools, materials)

Academic databases (peer-reviewed literature)

Internet/web (e.g. search for tools reports, policies/guideline, materials)

Other (e.g. media, social media)

Internal person sources

Internal non-person sources

External person sources

External non-person sources

Charlton P, et al. *BMJ Open* 2022; 11:e050284. doi: 10.1136/bmjopen-2021-050284

Conditioned viewing - Passive data collection

Searching - Active data collection

| Authors/<br>Year                                                                                                                                                                                            | Data Collection Methods                                                                                                                                                               |   |   |   |   |   | Data Sources |  |  |  |  | Data Source Mode |  |  | Scanning Mode |  |
|-------------------------------------------------------------------------------------------------------------------------------------------------------------------------------------------------------------|---------------------------------------------------------------------------------------------------------------------------------------------------------------------------------------|---|---|---|---|---|--------------|--|--|--|--|------------------|--|--|---------------|--|
| Deshpande, Kholia, Mckibbon et al. 2008b (132)<br><br>Dietitians of Canada 2018 (133)<br><br>Forsberg et al. 2014 (134)<br><br>Garland 2015 (135)<br><br>Great Plains Quality Innovation Network 2016 (136) | BMJ Publishing Group Limited (BMJ) disclaims all liability and responsibility arising from any reliance placed on this supplemental material which has been supplied by the author(s) |   |   |   |   |   |              |  |  |  |  |                  |  |  |               |  |
|                                                                                                                                                                                                             | Literature review (academic and grey literature)                                                                                                                                      | X | X | X | X | X |              |  |  |  |  |                  |  |  |               |  |
|                                                                                                                                                                                                             | Survey                                                                                                                                                                                |   | X |   |   |   |              |  |  |  |  |                  |  |  |               |  |
|                                                                                                                                                                                                             | Key informant / semi- structured interviews                                                                                                                                           |   |   | X |   |   |              |  |  |  |  |                  |  |  |               |  |
|                                                                                                                                                                                                             | Focus group                                                                                                                                                                           |   |   |   |   |   |              |  |  |  |  |                  |  |  |               |  |
|                                                                                                                                                                                                             | Other person contact (e.g. advisory groups, individuals, networks)                                                                                                                    |   |   |   | X |   |              |  |  |  |  |                  |  |  |               |  |
|                                                                                                                                                                                                             | Other (e.g. database, site visits, social media)                                                                                                                                      |   |   |   |   |   |              |  |  |  |  |                  |  |  |               |  |
|                                                                                                                                                                                                             | Person sources                                                                                                                                                                        |   | X | X | X | X |              |  |  |  |  |                  |  |  |               |  |
|                                                                                                                                                                                                             | Administrative databases                                                                                                                                                              |   |   |   |   |   |              |  |  |  |  |                  |  |  |               |  |
|                                                                                                                                                                                                             | Other grey literature (e.g. reports, guidelines, policies, tools, materials)                                                                                                          |   |   | X |   |   |              |  |  |  |  |                  |  |  |               |  |
|                                                                                                                                                                                                             | Academic databases (peer-reviewed literature)                                                                                                                                         |   |   |   | X | X |              |  |  |  |  |                  |  |  |               |  |
|                                                                                                                                                                                                             | Internet/web (e.g. search for tools reports, policies/guideline, materials)                                                                                                           |   |   |   | X | X |              |  |  |  |  |                  |  |  |               |  |
|                                                                                                                                                                                                             | Other (e.g. media, social media)                                                                                                                                                      |   |   |   |   |   |              |  |  |  |  |                  |  |  |               |  |
|                                                                                                                                                                                                             | Internal person sources                                                                                                                                                               | X |   |   |   |   |              |  |  |  |  |                  |  |  |               |  |
|                                                                                                                                                                                                             | Internal non-person sources                                                                                                                                                           |   |   |   |   |   |              |  |  |  |  |                  |  |  |               |  |
| External person sources                                                                                                                                                                                     |                                                                                                                                                                                       |   | X | X | X |   |              |  |  |  |  |                  |  |  |               |  |
| External non-person sources                                                                                                                                                                                 |                                                                                                                                                                                       | X | X | X | X |   |              |  |  |  |  |                  |  |  |               |  |
| Charlton P, et al. <i>BMJ Open</i> 2022; 11:e050284. doi: 10.1136/bmjopen-2021-050284                                                                                                                       |                                                                                                                                                                                       |   |   |   |   |   |              |  |  |  |  |                  |  |  |               |  |
| Conditioned viewing - Passive data collection                                                                                                                                                               |                                                                                                                                                                                       | X | X | X | X |   |              |  |  |  |  |                  |  |  |               |  |
| Searching - Active data collection                                                                                                                                                                          | X                                                                                                                                                                                     |   |   | X | X |   |              |  |  |  |  |                  |  |  |               |  |

| Authors/<br>Year                 | Data Collection Methods                          |        |                                             |             |                                                                    |                                                  | Data Sources   |                          |                                                                              |                                               |                                                                             | Data Source Mode                 |                         |                             | Scanning Mode           |                             |                                               |                                    |
|----------------------------------|--------------------------------------------------|--------|---------------------------------------------|-------------|--------------------------------------------------------------------|--------------------------------------------------|----------------|--------------------------|------------------------------------------------------------------------------|-----------------------------------------------|-----------------------------------------------------------------------------|----------------------------------|-------------------------|-----------------------------|-------------------------|-----------------------------|-----------------------------------------------|------------------------------------|
|                                  | Literature review (academic and grey literature) | Survey | Key informant / semi- structured interviews | Focus group | Other person contact (e.g. advisory groups, individuals, networks) | Other (e.g. database, site visits, social media) | Person sources | Administrative databases | Other grey literature (e.g. reports, guidelines, policies, tools, materials) | Academic databases (peer-reviewed literature) | Internet/web (e.g. search for tools reports, policies/guideline, materials) | Other (e.g. media, social media) | Internal person sources | Internal non-person sources | External person sources | External non-person sources | Conditioned viewing - Passive data collection | Searching - Active data collection |
| Health Tech Solutions 2018 (137) |                                                  | X      |                                             |             |                                                                    |                                                  | X              |                          |                                                                              |                                               |                                                                             | X                                |                         |                             |                         |                             |                                               | X                                  |
| Hochman 2019 (138)               | X                                                |        |                                             |             |                                                                    |                                                  |                |                          | X                                                                            | X                                             |                                                                             |                                  |                         |                             |                         |                             | X                                             |                                    |
| Loorand-Stiver 2012a (139)       |                                                  | X      |                                             |             |                                                                    |                                                  | X              |                          |                                                                              |                                               |                                                                             |                                  |                         |                             |                         |                             |                                               | X                                  |
| Loorand-Stiver 2012b (140)       | X                                                | X      |                                             |             |                                                                    | X                                                |                |                          | NSI                                                                          | NSI                                           |                                                                             |                                  |                         |                             | X                       | X                           |                                               | X                                  |
| Mason & Ford 2017 (141)          | X                                                | X      |                                             |             | X                                                                  |                                                  | X              |                          | X                                                                            | X                                             |                                                                             |                                  |                         |                             | X                       | X                           |                                               | X                                  |
| McGrath et al. 2017 (142)        | X                                                |        | X                                           |             |                                                                    | X                                                |                |                          |                                                                              | X                                             |                                                                             |                                  |                         |                             | X                       | X                           |                                               | X                                  |

| Authors/<br>Year             | Data Collection Methods                          |        |                                             |             |                                                                    | Data Sources                                     |                |                          |                                                                              |                                               | Data Source Mode                                                            |                                  |                         | Scanning Mode               |                         |                             |                                               |                                    |
|------------------------------|--------------------------------------------------|--------|---------------------------------------------|-------------|--------------------------------------------------------------------|--------------------------------------------------|----------------|--------------------------|------------------------------------------------------------------------------|-----------------------------------------------|-----------------------------------------------------------------------------|----------------------------------|-------------------------|-----------------------------|-------------------------|-----------------------------|-----------------------------------------------|------------------------------------|
|                              | Literature review (academic and grey literature) | Survey | Key informant / semi- structured interviews | Focus group | Other person contact (e.g. advisory groups, individuals, networks) | Other (e.g. database, site visits, social media) | Person sources | Administrative databases | Other grey literature (e.g. reports, guidelines, policies, tools, materials) | Academic databases (peer-reviewed literature) | Internet/web (e.g. search for tools reports, policies/guideline, materials) | Other (e.g. media, social media) | Internal person sources | Internal non-person sources | External person sources | External non-person sources | Conditioned viewing - Passive data collection | Searching - Active data collection |
| Medstar et al. 2017 (153)    | X                                                | X      | X                                           |             |                                                                    | X                                                | X              |                          | X                                                                            | X                                             | X                                                                           | X                                |                         |                             | X                       | X                           |                                               | X                                  |
| Moran et al. 2017 (143)      | X                                                |        |                                             |             |                                                                    |                                                  |                |                          | X                                                                            | X                                             |                                                                             |                                  |                         |                             |                         | X                           |                                               |                                    |
| Morrison 2009 (144)          | X                                                |        | X                                           |             |                                                                    |                                                  | X              |                          | NSI                                                                          | NSI                                           |                                                                             |                                  |                         |                             | X                       | X                           |                                               | X                                  |
| Morrison & Dowler 2011 (145) | X                                                |        | X                                           |             |                                                                    |                                                  | X              |                          | NSI                                                                          | NSI                                           |                                                                             |                                  |                         |                             | X                       | X                           |                                               | X                                  |
| Murzin & Furlotte 2013 (146) |                                                  | X      |                                             |             |                                                                    |                                                  | X              |                          |                                                                              |                                               |                                                                             | X                                |                         |                             | X                       |                             |                                               | X                                  |
| Ndegwa, 2010 (147)           | X                                                |        | X                                           |             |                                                                    |                                                  | X              |                          | NSI                                                                          | NSI                                           |                                                                             |                                  |                         |                             | X                       | X                           |                                               | X                                  |
| Ndegwa 2011 (148)            | X                                                |        | X                                           |             |                                                                    |                                                  | X              |                          |                                                                              | X                                             |                                                                             |                                  |                         |                             | X                       | X                           |                                               | X                                  |

| Authors/<br>Year            | Data Collection Methods |   |   |   |   |   | Data Sources |  |  |   |   | Data Source Mode |  |   | Scanning Mode |   |
|-----------------------------|-------------------------|---|---|---|---|---|--------------|--|--|---|---|------------------|--|---|---------------|---|
| Ndegwa et al. 2018 (149)    | X                       | X | X | X | X | X | X            |  |  |   | X |                  |  |   | X             | X |
| Paccagnan et al. 2017 (150) | X                       | X |   |   | X |   | X            |  |  |   | X |                  |  | X | X             | X |
| Seal et al 2018 (151)       | X                       | X |   |   | X |   | X            |  |  | X |   |                  |  | X | X             | X |
| Smith 2001 (152)            |                         | X |   |   |   |   | X            |  |  |   | X |                  |  |   |               | X |
| Topfer & Spry 2019 (154)    | X                       | X |   |   | X |   | X            |  |  | X |   |                  |  | X | X             | X |
| Tran et al. 2008 (155)      | X                       |   | X |   |   |   | X            |  |  |   | X |                  |  | X | X             | X |
| Wells et al. 2019 (156)     | X                       |   |   |   |   |   | X            |  |  |   | X |                  |  | X | X             | X |

BMJ Publishing Group Limited (BMJ) disclaims all liability and responsibility arising from any reliance placed on this supplemental material which has been supplied by the author(s)

Literature review (academic and grey literature)

Survey

Key informant / semi- structured interviews

Focus group

Other person contact (e.g. advisory groups, individuals, networks)

Other (e.g. database, site visits, social media)

Person sources

Administrative databases

Other grey literature (e.g. reports, guidelines, policies, tools, materials)

Academic databases (peer-reviewed literature)

Internet/web (e.g. search for tools reports, policies/guideline, materials)

Other (e.g. media, social media)

Internal person sources

Internal non-person sources

External person sources

External non-person sources

Charlton P, et al. *BMJ Open* 2022; 11:e050284. doi: 10.1136/bmjopen-2021-050284

Conditioned viewing - Passive data collection

Searching - Active data collection

| Authors/<br>Year         | Data Collection Methods                          |        |                                             |             |                                                                    |                                                  | Data Sources   |                          |                                                                               |                                               |                                                                             | Data Source Mode                 |                         |                             | Scanning Mode           |                             |                                               |                                    |
|--------------------------|--------------------------------------------------|--------|---------------------------------------------|-------------|--------------------------------------------------------------------|--------------------------------------------------|----------------|--------------------------|-------------------------------------------------------------------------------|-----------------------------------------------|-----------------------------------------------------------------------------|----------------------------------|-------------------------|-----------------------------|-------------------------|-----------------------------|-----------------------------------------------|------------------------------------|
|                          | Literature review (academic and grey literature) | Survey | Key informant / semi- structured interviews | Focus group | Other person contact (e.g. advisory groups, individuals, networks) | Other (e.g. database, site visits, social media) | Person sources | Administrative databases | Other grey literature (e.g. reports, guidelines , policies, tools, materials) | Academic databases (peer-reviewed literature) | Internet/web (e.g. search for tools reports, policies/guideline, materials) | Other (e.g. media, social media) | Internal person sources | Internal non-person sources | External person sources | External non-person sources | Conditioned viewing - Passive data collection | Searching - Active data collection |
| Young et al. 2018 (157)  |                                                  | X      |                                             |             |                                                                    |                                                  | X              |                          |                                                                               |                                               |                                                                             |                                  |                         |                             |                         |                             |                                               | X                                  |
| Yurick et al. 2016 (158) |                                                  |        | X                                           |             |                                                                    |                                                  | X              |                          |                                                                               | X                                             |                                                                             |                                  |                         |                             | X                       |                             | X                                             | X                                  |

\* The data collection methods, data sources, data source mode, and scanning mode refer only to the environmental scanning component of the study. \*\* NSI = not clear or not specifically reported

BMJ Publishing Group Limited (BMJ) disclaims all liability and responsibility arising from any reliance placed on this supplemental material which has been supplied by the author(s)
