# Supplementary material for: Use of environmental scans in health services delivery research: a scoping review
Source: PubMed Central journal article supplement — BMJ Open. 2021 Nov 10;11(11):e050284. doi: 10.1136/bmjopen-2021-050284 (PMC8587593; doi:10.1136/bmjopen-2021-050284), 2021-11-10
Supplement: bmjopen-2021-050284supp006.pdf [file bmjopen-2021-050284supp006.pdf]

**Supplementary file 6****Definitions and descriptions of environmental scan**

| Author                               | Definition/Description                                                                                                                                                                                                                                                                                                                                                                                                                                                                                                                                                                                                                                                                                                                                                                                                                                                                                                                                                                                                                         |
|--------------------------------------|------------------------------------------------------------------------------------------------------------------------------------------------------------------------------------------------------------------------------------------------------------------------------------------------------------------------------------------------------------------------------------------------------------------------------------------------------------------------------------------------------------------------------------------------------------------------------------------------------------------------------------------------------------------------------------------------------------------------------------------------------------------------------------------------------------------------------------------------------------------------------------------------------------------------------------------------------------------------------------------------------------------------------------------------|
| Baesconde-Garbanati et al., 2017 [1] | “Although environmental scans originated in the business sector, they have come to be used in public health to collect data that can be used to develop health programs and interventions tailored to the unique needs of specific communities [2] Environmental scans can help assess strengths, weaknesses, challenges, and opportunities for improvement. They may help to refute or confirm common perceptions within the community. The methodology for environmental scans vary depending on the needs of the organization or community. However, they often include multiple sources of internal and external data (e.g., literature review, surveys, interviews with key stakeholders, internal documents, focus groups, technology), various target populations, and program planning [3] Environmental scans can be a valuable tool to raise awareness of issues, plan for the future, develop interventions, assist in health decision-making, and provide information for the development of evidence- based policies” [3] p. 4931 |
| Bakhrui et al., 2015 [4]             | “An environmental scan is defined as a review of current structures, processes and outcomes of care, and barriers to the new process understood in the context of the ecosystem (in this case, the ICU)” [4] p. 2361                                                                                                                                                                                                                                                                                                                                                                                                                                                                                                                                                                                                                                                                                                                                                                                                                           |
| Bednar et al., 2018 [5]              | “An ES is a mixed-methods tool used in business, government, and public health to collect information, identify risks and opportunities, tailor strategic plans, or design programs in a flexible, rapid, comprehensive, low-cost manner” [2,3,6] p. 1483                                                                                                                                                                                                                                                                                                                                                                                                                                                                                                                                                                                                                                                                                                                                                                                      |
| Blackman, 2018 [7]                   | “There has been an increasing interest in environmental scans in public health practice, as they are now recognized as a valuable assessment and data collection tool by federal funding agencies and other health-related organizations. [8] Environmental scans originated in the business world as a tool for retrieving and organizing data to facilitate with strategic planning and decision-making.[3] Within the arena of public health, environmental scans have been used to collect, organize, and analyze information to guide the direction of new public health activity, raise awareness of health disparities, or initiate a project or funding opportunity [8]... As Rowel et al. [2] posited, the realities of the 21st century with regards to new technologies and diversity in sources of information have forced public health to                                                                                                                                                                                        |

reconsider traditional approaches to knowledge generation. It has been recognized that in a health environment that experiences challenges such as scarcity of resources, innovative approaches to public health research and practice is needed to maximize existing resources, ensure timely responses to health crises, and build on established knowledge. [2] Environmental scans incorporate nontraditional methods in searching for evidence that include exploring the Internet and directly contacting or surveying other programs, organizations, or experts. [9]

An advantage to an environmental scan approach is the allowance for organizations to account for diverse types of knowledge, which includes codified from statistics, policy documents, or clinical reviews) and tacit knowledge (data from interviews or focus groups). [3] There are multiple strategies for information collection that include, but are not limited to, focus groups, in-depth interviews, surveys, literature assessments, chart reviews, personal communication, and policy analyses.[8] The goal of environmental scans is to use the information attained to design health programs that meet the needs of the target population. Intrinsically, they are designed to help the process of planning for the future by guiding health organizations and projects, thereby leading to evidence-based solutions for health care issues [3]... A noted limitation of environmental scans is the inconsistent approach to conducting them, resulting in ambiguity of the process. [3,8] pp. 9-11, 30

Fong et al.,  
2018  
[10]

“A built environmental scan is an objective review of the environmental factors that influence an organization; those factors can include programs, policies, and physical features (for example, the availability of visible, safe, and clean stairs for walking) within an organization” [2] p. e366

Glurich et  
al., 2017  
[11]

“Ad hoc environmental scans are cross sectional surveys undertaken at unspecified frequency, for the purpose of reviewing the current relevant evidence base across a range of sources in an attempt to ascertain the current state of the art surrounding the specific topic under focus. Such scans are conducted to collect information that may inform future planning of various vested stakeholders” [11] p. 22

- Leiva Portocarrero et al., 2015 [12] “Environmental scans were developed as tools for retrieving and organizing data from a wide variety of fields in order to identify contexts and shifts in planning for the future. They can include internal (memos, notes from meetings with stakeholders, etc) as well as external sources (e.g., newly available technologies)” [3] p. 3
- Luke et al., 2018 [13] “An environmental scan was used to generate a map of paediatric PN models of care in Canada. Originating in the business context, environmental scans are useful tools to develop insight into the utilization of health services [2,3]. Environmental scans allow for the assessment of trends, status, policy initiatives and strategies within a specific area [14,15] and have the advantage of identifying and avoiding potential problems and implementing useful solutions” [16] p. e47
- Medstar et al., 2017 [17] “An environmental scan is an integral process for identifying, retrieving, and organizing information to enable health decision making and has been used to foster knowledge translation in primary care.” [3,18] p. 2
- Mew et al., 2017 [19] “We used an environmental scanning (ES) approach to consolidate information from community leaders, frontline practitioners, and publically available sources [3,20]. The first phase of our ES employed an active approach by gathering information from primary sources such as perspectives of First Nations health leaders and relevant stakeholders [3]. The second phase employed a passive approach by gathering information from secondary sources, such as publically available information, to supplement the results obtained from the active approach” [3] p. 3
- Moore et al., 2015 [21] “An environmental scan has been defined as the acquisition and use of information about events, trends and relationships in an organization’s external environment, the knowledge of which would assist management in planning the organization’s future course of action” [20] p. 303
- Naumann et al., 2013 [22] “In comparison, environmental scans are emerging as an effective tool to collect evidence pertaining to healthcare service delivery gaps...Originating within the business context as a valuable method for retrieving and organizing needs assessment data, the environmental scan methodology has been growing in use and complexity, recently emerging as a popular method of effectively determining the health care needs of communities. Similar to the scoping study, both external and internal sources of data are utilized during an environmental scan. External sources of data include corporate media and sources, government data, and academic literature; internal

sources include the informal records and knowledge held by individuals or organizations, personal communications, minutes of meetings, memos, and other internal documents.” [3,23] p. 32, 35

- Porterfield et al., 2012 [24] “An environmental scan examines unpublished literature and publicly available program information” [24] p. S164
- Richard et al., 2016 [25] “Environmental scanning is a research approach that uses wide-scope screening methods to identify the new, the unexpected and the emerging interventions, issues and challenges in health” [3] p. 2
- Rowel et al., 2005 [2] “The environmental scan is a tool that can be utilized to collect data to design health programs uniquely tailored to the needs of communities.” [2] p. 527 “Environmental scanning is the acquisition and use of information about events, trends and relationships in an organization's external environment, the knowledge of which would assist management in planning the organization's future course of action.” p. 529 [20] and “environmental scanning as "a systematic and continuous effort to search for important cues about how the world is changing and how these changes are likely to affect your organization.” [26] p.529
- Scime et al., 2018 [27] “Despite origins in a business context a tool for gathering information to enable strategic action p. 203 [3,20] ... Specifically, environmental scans are suitable for the identification and synthesis of evidence about existing resources, organizational processes, barriers and facilitators to action, and/or knowledge and practice gaps pertaining to the topic under study. [2] p. 203
- Shahid et al., 2008 [28] “Environmental scanning is a method most commonly used in business but is quite popular in the health care sector around the world [29,30,31], and is used to identify emerging issues within the broader economic and political environment. [32] It is similar to situational analysis in which a review is undertaken of health strategies and policies, institutional support systems with the aim of strengthening health reform and health systems. It differs from audits which generally evaluate performance and are aimed at ascertaining the validity and reliability of information as part of quality control processes. Morrison argues that environmental scanning is a method that enables decision makers both to understand the external environment and the interconnections of its various sectors and to translate this understanding into an institution ’s planning and decision-making processes.” [33] “...The advantage of environmental scanning for

organizational leaders is that knowing the internal and external environment in which the organization operates is helpful in planning their future course of action.” [20] p. 57

- Tark et al., 2019 [34] “Environmental scanning is a research method in which publicly available information is gathered systematically and is used to evaluate both internal and external environments of organizations, organizational practices, and health programs. It produces important insights on current trends and occurrences based on existing resources and can assist with the development of evidence-based policies in future practices” [34] p. 1033
- Wittich et al., 2018 [35] “In healthcare research, the environmental scan is often employed as a needs-assessment tool for the purposes of improving and developing the efficiency of health service programs and evidence-based policies. In using this approach, environmental or contextual factors are evaluated by reviewing existing data or actively collecting new data in the form of surveys or interviews, including a diversity of views and information, to determine the benefits, needs and efficiencies of practices within that environment” [2,3] p. 2-3
- Wurz et al., 2019 [36] “Environmental scans are one way to identify and collate a large body of information seeking to achieve such an aim. [20,37] Moreover, they are a useful way to inform strategic planning, provide evidence about the direction of a field, and raise awareness about gaps in program/service availability” [3,38] p. 1154
- Yurick [39] “Environmental scans are considered a rapid review of information. The information gathered is considered incomplete until validated, but gives a snapshot of current work, as well as the breadth of depth of information available” [39] p. 94
-

## REFERENCES

1. Baezconde-Garbanati L, Lienemann BA, Robles M, et al. Implementation of HPV vaccination guidelines in a diverse population in Los Angeles: Results from an environmental scan of local HPV resources and needs. *Vaccine* 2017;35:4930–5.
2. Rowel R, Moore ND, Nowrojee S, et al. The utility of the environmental scan for public health practice: lessons from an urban program to increase cancer screening. *J Natl Med Assoc* 2005;97:527–34.
3. Graham P, Evitts T, Thomas-MacLean R. Environmental scans: how useful are they for primary care research? *Can Fam Physician Med Fam Can* 2008;54:1022–3.
4. Bakhru RN, Wiebe DJ, McWilliams DJ, et al. An environmental scan for early mobilization practices in U.S. ICUs. *Crit Care Med* 2015;43:2360–9.
5. Bednar EM, Walsh MT, Baker E, et al. Creation and implementation of an environmental scan to assess cancer genetics services at three oncology care settings. *J Genet Couns* 2018;27:1482-1496.
6. Society for Human Resource Management. *Strategic planning: what are the basics of environmental scanning?* 2012. [www.shrm.org/resourcesandtools/tools-and-samples/hr-qa/pages/cms\\_021670.aspx](http://www.shrm.org/resourcesandtools/tools-and-samples/hr-qa/pages/cms_021670.aspx).
7. Blackman N. *Chronic Disease and Injury Prevention Programming for Canada's Indigenous Population* [dissertation]. Walden Dissertation and Doctoral Studies, Walden University, 2018. <https://scholarworks.waldenu.edu/cgi/viewcontent.cgi?article=6444&context=dissertation>. (Accessed Feb 2021)
8. Wilburn A, Vanderpool RC, Knight JR. Environmental scanning as a public health tool: Kentucky's human papillomavirus vaccination project. *Prev Chronic Dis* 2016;13:E109
9. Canadian Partnership Against Cancer. *Environmental scanning*. 2012 Retrieved from <http://www.cancerview.ca/treatmentandsupport/grcmain/grcgd/grcgdsearchingthe>
10. Fong AJ, Jones JM, Faulkner G, et al. Exploring cancer centres for physical activity and sedentary behaviour support for breast cancer survivors. *Curr Oncol* 2018;25: e365-e372.
11. Glurich I, Nycz G, Acharya A. Status update on translation of integrated primary dental-medical care delivery for management of diabetic patients. *Clin Med Res* 2017;15:21–32.
12. Leiva Portocarrero ME, Garvelink MM, Becerra Perez MM, et al. Decision aids that support decisions about prenatal testing for down syndrome: an environmental scan. *BMC Med Inform Decis Mak* 2015;15:76.
13. Luke A, Doucet S, Azar R. Paediatric patient navigation models of care in Canada: An environmental scan. *Paediatr Child Health* 2018;23:e46-55.
14. Barker KK, Bosco C, Oandasan IF. Factors in implementing interprofessional education and collaborative practice initiatives: Findings from key informant interviews. *J Interprof Care* 2005;19(Suppl. 1):166–76.

15. Health Canada. (2003). *A request for proposal from Health Canada – Interdisciplinary Education for Collaborative, Patient-Centred Practice: Discussion paper & research report*. Ottawa, ON: Health Canada.
16. Côté G, Lauzon C, Kyd-Strickland B. Environmental scan of interprofessional collaborative practice initiatives. *J Interprof Care* 2008;22:449–60.
17. Medstar Health Research Institute, Smith K, Baker K, et al. *Guide to improving patient safety in primary care settings by engaging patients and families-environmental scan report*. Rockville, Maryland: Agency for Healthcare Research and Quality (AHRQ), 2017. <https://www.ahrq.gov/sites/default/files/wysiwyg/professionals/quality-patient-safety/patient-family-engagement/pfeprimarycare/envscan-report.pdf>. (Accessed Feb 2021).
18. Solberg LI, Elward KS, Phillips WR, et al. How can primary care cross the quality chasm? *Ann Fam Med* 2009;7:164–9.
19. Mew EJ, Ritchie SD, VanderBurgh D, et al. An environmental scan of emergency response systems and services in remote First Nations communities in Northern Ontario. *Int J Circumpolar Health* 2017;76:1320208
20. Choo CW. Environmental scanning as information seeking and organizational learning. *Inf Res* 2001;7:1–26.
21. Moore C, Lee J, Milligan J, et al. Physical activity as medicine among family health teams: an environmental scan of physical activity services in an interdisciplinary primary care setting. *Appl Physiol Nutr Metab* 2015;40:302-5.
22. Naumann DN, Reynolds JN, McColl MA, et al. Environmental scan of programs for fetal alcohol spectrum disorder in Eastern Ontario. *J Dev Disabil* 2013;19:29-49.
23. Scobba V. PS1-23: The environmental scan: a valuable community health research tool. *Clin Med Res* 2010;8:184–5
24. Porterfield DS, Hinnant LW, Kane H, et al. Linkages between clinical practices and community organizations for prevention: a literature review and environmental scan. *Am J Public Health* 2012;42:S163-S171.
25. Richard L, Furler J, Densley K, et al. Equity of access to primary healthcare for vulnerable populations: the IMPACT international online survey of innovations. *Int J Equity Health* 2016;15:64
26. Blanken RL, Liff A. *Facing the future: preparing your association to thrive: emerging trends from the ASAE Foundation's ongoing environmental scan research*. Washington, DC: American Society of Association Executives, 1999.
27. Scime NV, Burke SM. Environmental scan of breastfeeding resources in Canadian NICUs. *JOGNN* 2018;47:202–13.
28. Shahid S, Beckmann KR, Thompson SC. Supporting cancer control for Indigenous Australians: initiatives and challenges for cancer councils. *Aust Health Rev Publ Aust Hosp Assoc* 2008;32:56–65.

29. Marton C. Environmental scan on women's health information resources in Ontario, Canada. *Inf Res* 2001;7.
30. El Jardali F, Fooks C. *An environmental scan of current views on health human resources in Canada: identified problems, proposed solutions and gap analysis*. Prepared for the National Health Human Resources Summit 2005. Toronto, ON: Health Council of Canada.
31. Thomas G. *Addiction treatment indicators in Canada: an environmental scan*. Canadian Centre on Substance Abuse 2005. Ottawa, ON: Canadian Centre on Substance Abuse
32. Harris H, Martin C. Environmental scanning in the Australian manufacturing sector: a discussion of some early results. In: Sohal A, Cooney R. ed. *Proceedings of the Sixth International Research Conference on Quality Innovation and Knowledge Management* 2002; 17-20 Feb Kuala Lumpur. P. 659-66
33. Morrison J. Environmental Scanning. In: In M. A. Whitely, J. D. Porter, and R. H. Fenske ed. *A Primer for New Institutional Researchers*. Tallahassee, Florida: The Association for Institutional Research 1992. 86-99. <http://horizon.unc.edu/courses/papers/enviroscan/> (Accessed Feb 2021).
34. Tark A, Agarwal M, Dick AW, et al. Variations in physician orders for life-sustaining treatment program across the nation: environmental scan. *J Palliat Med* 2019;22:1032-8.
35. Wittich W, Höbler F, Jarry J, et al. Recommendations for successful sensory screening in older adults with dementia in long-term care: a qualitative environmental scan of Canadian specialists. *BMJ Open* 2018;8:e019451.
36. Wurz A, Daeggelmann J, Albinati N, et al. Physical activity programs for children diagnosed with cancer: an international environmental scan. *Support Care Cancer* 2019;27:1153-62.
37. Pashiardis P. Environmental scanning in educational organizations: Uses, approaches, sources and methodologies. *Int J Educ Manag* 1996;10:5-9.
38. Albright K. Environmental scanning: radar for organizational success. *Inf Manag J* 2004;38:38-45.
39. Yurick J, Allatt D. *Supportive care framework report*. Alberta Health Services, Cancer Control Alberta, 2016. <https://www.albertahealthservices.ca/assets/info/hp/cancer/if-hp-cancer-supportive-care-framework-report.pdf>. (Accessed Feb 2021).
